# Supplementary material for: CBP/p300 Drives the Differentiation of Regulatory T Cells through Transcriptional and Non-Transcriptional Mechanisms
Source: Oxford University Press journal article supplement (doi:10.1158/0008-5472.can-18-3622), 2019-06-10
Supplement: 00085472can183622-sup-212292_2_supp_5547189_ps309v.xlsx [file 00085472can183622-sup-212292_2_supp_5547189_ps309v.xlsx]

## Sheet: Table S1
Table S1. List of 2153 genes identified as the human Treg differentiation geneset (P adjusted value <0.05). Data from 5 donors. See heatmap in Fig. 1B.
Gene	log2FC	AdjPvalue
CTSL1	10.026	2.14e-15
PTCHD1	9.75206	2.24e-20
C1orf106	8.09239	1.92e-15
MYO5B	7.29293	1.84e-08
PMEPA1	6.66293	5.58e-10
APOD	6.5542	1.68e-07
SPON1	6.09177	1.03e-08
KIF26B	5.93485	1.76e-07
TNFAIP8L3	5.91325	5.17e-07
TGFBI	5.89345	1.79e-11
CCL22	5.71753	2.16e-06
STMND1	5.5413	3.05e-07
MMP2	5.52552	4.22e-06
QPCT	5.41104	1.79e-11
DAZL	5.35868	2.16e-06
COL15A1	5.34447	3.35e-06
EPHA1	5.10028	3.73e-07
RORC	5.03365	2.34e-07
ARHGEF40	5.02272	5.65e-08
CHST3	4.98379	1.4e-08
MYO7A	4.91748	2.32e-07
COL5A2	4.89636	7.26e-08
LPL	4.52431	0.000170683
GAP43	4.5143	1.88e-07
NRP2	4.38864	2.9e-07
SLC14A1	4.35656	2.21e-08
SH3RF1	4.32523	2.31e-05
GOLGA8G	4.26477	0.000234084
KCNJ15	4.26347	1.53e-07
ADCY6	4.25945	1.39e-08
KRT79	4.25394	0.000683977
CRYAB	4.2061	1.66e-05
ITPRIPL2	4.19599	7.43e-08
LMCD1	4.17823	5.65e-08
CCL20	4.16817	0.000370173
VASH1	4.10943	1.32e-07
RBP1	4.04835	2.04e-06
GAS2	4.01418	0.000106212
GPR161	4.00682	1.3e-07
WDR65	4.00451	9.24e-05
NFATC4	3.98807	1.13e-06
TENM2	3.94983	1.22e-05
GLT1D1	3.78701	4.79e-09
PRSS23	3.78348	3.76e-07
TNS3	3.7812	1.26e-06
PTGS1	3.75894	1.87e-07
FAM131C	3.75186	0.000119657
RGS16	3.74476	1.76e-07
IL1A	3.73302	0.00537679
CDS1	3.70792	4.19e-07
MRC2	3.70602	1.75e-08
ATP8B1	3.6612	9.12e-06
DEC1	3.65764	5.98e-06
TJP1	3.62242	2.35e-05
MMP9	3.60759	5.11e-08
LAMC2	3.59973	0.0117689
FOXP3	3.58604	4.67e-05
DIRAS3	3.58325	8.13e-05
DBH	3.56258	6.02e-07
RAI2	3.55515	7.34e-06
FOXA1	3.55498	0.000101157
SLCO5A1	3.52992	4.18e-05
IL17RD	3.52538	1.9e-07
RAPGEF3	3.48124	1.73e-07
NCS1	3.46194	0.000370173
CR2	3.45249	0.00101418
PON3	3.43593	0.00111489
ISM1	3.43592	0.000223336
CD101	3.42427	2.2e-09
KCNH4	3.42419	8.8e-05
ECEL1	3.42324	0.000430079
ZNF704	3.41921	3.16e-08
CRMP1	3.40687	5.27e-05
DUSP4	3.40026	5.29e-08
PLEK2	3.39885	2.46e-09
NR4A3	3.39786	1.72e-05
ATP1B1	3.39518	1.3e-07
NSG1	3.38394	0.000157136
RBPMS	3.38012	0.000310132
RASGRP4	3.36575	3.25e-07
TNNT1	3.36412	1.75e-08
FNBP1L	3.3531	4.95e-08
TNFSF11	3.35003	1.46e-07
PLEKHA6	3.34098	5.13e-06
CHN1	3.33527	7.43e-08
SLC16A2	3.29205	6.2e-05
BASP1	3.28838	0.000686119
CD160	3.28157	3.52e-06
CDK14	3.25925	5.23e-11
GPR157	3.23868	1.83e-07
SAMD11	3.23715	2.48e-05
WDFY3	3.23592	0.00132358
GRB7	3.23238	5.65e-07
CYS1	3.22482	2.62e-08
TNP1	3.21725	0.000794951
NCR2	3.21664	4.18e-05
SLC6A17	3.19492	3.25e-07
ENTHD1	3.19357	3.46e-05
ADAM12	3.18038	0.00053873
ALPK2	3.17425	0.0068832
CSRP2	3.1736	0.00182485
SPATC1	3.16488	2.5e-05
SKIL	3.14413	5.23e-11
ARMC4	3.13368	4.57e-06
WWC1	3.1191	0.00794343
PRKCDBP	3.10757	4.95e-08
NEBL	3.09854	0.00140697
TOM1L1	3.09528	0.00014797
NIPAL4	3.08755	3.84e-05
IKZF4	3.08377	1.15e-09
RSAD2	3.07915	0.000436811
FUT7	3.07823	0.0016309
TGFA	3.06791	0.000667877
COL6A3	3.05536	0.00245644
SPTB	3.03886	1.94e-05
GAS6	3.02744	3.52e-05
GRIP1	3.02231	0.000219678
MAGI2	3.01193	2.9e-07
C9orf139	3.00217	0.0028441
CCL5	2.99256	2.53e-08
NMU	2.98969	3.65e-07
PPARG	2.97465	0.0028284
TMEM110-MUSTN1	2.9681	0.00281532
CPXM1	2.95411	3.25e-07
LMNA	2.95147	5.68e-06
THBS1	2.94035	0.00309508
ALPK3	2.93695	8.25e-05
DGCR5	2.93583	0.000456979
KCNQ3	2.93162	0.000250846
FMOD	2.92957	3.75e-05
ARHGAP20	2.91422	4.08e-05
CYP1A2	2.90762	0.0154447
MYH6	2.90731	0.0177986
COL6A1	2.90723	0.000243258
CLDN23	2.89201	0.00118598
CXCR3	2.89016	0.00362905
CAPG	2.88536	4.03e-10
GOLGA8I	2.88435	9.4e-07
SEMA7A	2.88314	5.29e-08
NYNRIN	2.87056	0.000107475
CD83	2.8676	0.00369694
IL1RN	2.86382	0.000109058
CHMP4C	2.86232	9.6e-07
TGM5	2.86074	0.00870537
MUC4	2.82762	0.000720538
NOXO1	2.82389	0.00591945
MAGI1	2.81987	0.000258434
TVP23A	2.80114	0.0049767
NLRP3	2.80059	0.00631681
RBM20	2.79744	0.000141829
EFHB	2.79656	0.00705884
CHRFAM7A	2.79574	0.00287176
RYR1	2.78886	1.83e-05
CLIC5	2.7871	4.22e-06
TNFRSF9	2.78604	1.53e-07
SARDH	2.77806	3.72e-09
TNFSF13	2.77079	6.15e-07
SLC1A1	2.75816	0.000204672
DYX1C1	2.7328	0.0176287
TMPRSS6	2.72184	0.00376622
RTKN	2.71593	3.1e-09
FARP1	2.70971	5.91e-06
RAB31	2.69735	0.0102659
CEP170B	2.68982	4.95e-06
CAMSAP2	2.68204	2.47e-08
CHDH	2.67517	0.000725361
TTBK1	2.66621	2.16e-05
TLR5	2.66498	0.00371378
TIAM2	2.65713	3.35e-07
GCNT1	2.65017	2.06e-08
MROH7	2.6473	1.72e-05
ARHGAP31	2.63363	1.1e-07
PRODH	2.62801	0.00034207
SUSD4	2.62755	0.000546587
FMN1	2.62729	0.00281532
MRC1	2.62566	0.0208358
DHRS2	2.62503	0.000283046
NTRK3	2.62463	0.00187336
NXPH3	2.62013	0.0168912
MACC1	2.59572	0.00319781
RHOV	2.59525	1.17e-06
CREB3L3	2.58804	8.99e-05
CLIC3	2.58314	0.0207061
ADAMTSL2	2.58297	0.00402186
CCL17	2.58038	0.00094911
CHRNA7	2.57662	0.00087935
VSIG10	2.56957	0.00266436
C1QL1	2.56495	0.000256467
OLFML2A	2.55445	0.0194474
DNM1	2.55426	1.46e-05
JPH4	2.55267	7.26e-06
BFSP2	2.54789	0.000320955
SIAH3	2.5468	1.59e-05
NIPAL2	2.54176	3.79e-07
GPR87	2.53866	0.0014683
CCDC74B	2.53845	8.85e-05
FAM78B	2.53674	0.00666232
TMEM136	2.5341	0.00242202
ANKRD18B	2.53044	0.00585134
FNDC9	2.52777	4.38e-07
LRRC16B	2.52044	8.74e-07
NKD1	2.51225	2.02e-05
C2orf78	2.50915	0.00101032
MEIS3	2.50648	0.00258333
PTHLH	2.49737	0.00313089
KCTD16	2.49565	5.9e-06
PRDM5	2.49536	5.49e-06
ZNF469	2.49524	0.00344678
NPNT	2.49135	1.06e-05
EEF1A2	2.47731	0.00342935
ASAP2	2.47069	0.00104392
HMX2	2.45863	0.00136063
PTK2	2.45665	1.27e-05
GPR34	2.45551	0.0063986
GALNT6	2.4496	1.6e-05
TTLL9	2.44624	7.32e-06
PTPN21	2.44624	5.75e-05
SRRM3	2.4454	0.0335313
FKBP10	2.44184	0.000733372
ABAT	2.4379	1.84e-06
MATN2	2.43727	6.35e-05
FERMT1	2.40863	8.11e-05
EPPK1	2.40759	0.026769
GPR126	2.40033	0.000116148
SPTBN2	2.39557	4.82e-06
CLEC17A	2.39127	0.000716064
PDCD1	2.38275	2.58e-06
C2CD4D	2.38155	0.00185387
ANK1	2.37871	7.45e-06
ACOT11	2.37488	4.82e-06
MARCKS	2.36461	1.74e-06
HMCN1	2.36203	0.0065738
GNG12	2.33738	1.1e-05
SCN2A	2.32777	0.000146121
GLI3	2.32522	0.0129971
CD80	2.32242	0.000459365
CAV1	2.31159	1.57e-05
TNFSF4	2.30829	0.0146394
KCNS3	2.30608	0.0188466
PRUNE2	2.29875	0.00170226
EPB41L1	2.29665	8.97e-06
ESPN	2.2924	0.00163371
TMEM200B	2.29202	0.000392065
BMF	2.2864	0.00664673
COL26A1	2.28606	0.0112683
TMEM139	2.28459	0.000127243
FBLN2	2.27957	0.00671155
CD79A	2.27687	8.46e-05
MAP2	2.27144	5.7e-05
CTNND1	2.27027	1.08e-06
ADPRH	2.26708	5.29e-08
TMEM37	2.26615	0.00065034
MAGI2-AS3	2.26615	0.0065738
KLRC2	2.26312	0.00612322
IGSF3	2.25465	4.97e-08
CPE	2.25437	0.0128517
ITGB8	2.25324	0.0178436
PBX1	2.25124	0.00363404
TGFB1I1	2.24873	0.00669129
FBXO27	2.24676	0.00438437
MFI2	2.24253	4.95e-08
ITIH4	2.2424	5.68e-06
LDLRAD4	2.24027	1.48e-08
FAM83F	2.23996	0.00869349
ABCB4	2.23482	0.0189909
SLC25A27	2.23137	0.00684634
PRRX2	2.23055	0.000828304
CSGALNACT1	2.22942	0.000286227
LGALS3	2.22117	0.0141939
APOBEC3H	2.21238	0.000305279
CALD1	2.20549	2.93e-07
DAPK2	2.18832	0.00589009
IL4I1	2.18541	1.31e-05
EBI3	2.18309	0.000173232
RHOD	2.17956	0.00697514
PTPN14	2.17821	0.000195799
OPRL1	2.17433	5.11e-08
CLDN1	2.1696	0.00267418
ULK4P3	2.1676	0.0364866
EVA1C	2.16724	2.32e-07
BCL2L11	2.16705	9.27e-07
FUT1	2.15729	0.000328989
TMEM130	2.15729	0.000868415
LPCAT2	2.15702	0.0318895
CLDN7	2.15476	0.00966846
DMD	2.15397	0.00159669
TUSC3	2.1537	0.00640472
SEMA4A	2.14865	4.16e-06
HSD11B2	2.13866	0.000733372
PROC	2.13866	0.0138744
BHLHE22	2.13508	0.000380572
PTPLA	2.13003	8.8e-05
CYTH3	2.12876	5.72e-05
PLXNB1	2.12866	3.48e-05
PTGFRN	2.12822	1.73e-07
SPATA25	2.12606	0.00282739
ENPP1	2.12016	0.00935876
CAPNS2	2.11646	0.0060772
FAM211A	2.11395	0.000231095
HAAO	2.11215	0.00145656
LTF	2.11102	0.0054737
CHST15	2.10877	0.00640065
DIXDC1	2.10196	0.0109199
IGF2BP1	2.09655	0.0317167
TNIP3	2.09473	0.000169798
EXTL2	2.09447	8.08e-05
SUOX	2.09344	2.57e-07
C1orf61	2.09149	0.00340804
NUDT12	2.08763	5.69e-06
CR1	2.08606	0.0152902
SPTBN5	2.07807	0.000613086
ECSCR	2.07484	0.00477518
COL6A2	2.07428	0.00349885
MARVELD1	2.07316	0.000397808
NCR3LG1	2.07309	0.00221955
PROS1	2.07033	0.000126464
CLNK	2.06615	0.0102845
C16orf74	2.06414	0.0268308
OTOA	2.05958	0.0377782
FXYD6	2.05948	0.0119071
KLHL35	2.05526	0.0319279
KIF7	2.05239	0.000476723
PROX1	2.0509	0.00339623
IQCJ-SCHIP1	2.04789	0.000456055
SLC30A3	2.04767	0.030871
LINGO4	2.04624	0.000132778
GJC3	2.04624	0.00982272
PLA1A	2.04574	0.0355197
PARP15	2.04486	0.000380572
B4GALT6	2.04356	1.27e-05
CYTL1	2.04029	0.00154973
CAMK2N2	2.04029	0.0140768
PLLP	2.04001	0.00200147
COL3A1	2.03575	0.0113003
CCR4	2.03208	6.98e-05
TTC39A	2.02697	0.00886523
TOB2P1	2.02697	0.0142987
VIM	2.02231	4.29e-06
GOLT1A	2.01926	0.00669102
RDH5	2.01597	0.0434635
KRT18	2.01466	6.28e-09
CYB5R2	2.01085	0.0273716
ABCB1	2.01038	3.75e-05
PGM2L1	2.00735	1.15e-09
SYBU	2.00186	0.0130824
BEX1	1.9999	0.0166867
GPR132	1.99498	6.83e-07
DFNB31	1.99425	0.00354485
KRTAP16-1	1.98769	0.0129971
RAG1	1.97119	0.00207877
AHCYL2	1.9707	8.88e-07
OBSL1	1.96986	0.0178916
STAC	1.96958	0.04772
DUOX1	1.96906	0.00173959
LBX2	1.96906	0.00210683
ATP6V1G3	1.96906	0.0258072
SFTPD	1.96906	0.0333776
HAP1	1.9681	0.0323587
ASPHD1	1.96769	0.00721464
PKP2	1.96313	0.0419212
CHRNA6	1.96129	4.04e-06
SBK1	1.95357	0.00813949
SRCIN1	1.95274	0.00422057
IGFBP5	1.95274	0.0124793
CTTN	1.94974	2.4e-06
HOMER2	1.94858	0.000275223
TNFRSF18	1.9417	0.000397808
STRIP2	1.94118	0.000285851
TSPAN18	1.93991	0.00302148
KIF5A	1.93986	4.95e-06
HES4	1.9377	0.0324558
EFCAB4A	1.93721	0.00478761
HECW2	1.92698	0.00375401
HSPA12A	1.92697	0.0270185
MYO1D	1.92548	4.79e-09
COL8A2	1.9233	0.0180349
BMPR2	1.91916	1.53e-07
PRRG4	1.91485	3.7e-05
IL9R	1.91191	0.00414383
CST3	1.91145	0.00662583
NFAM1	1.90983	8.61e-05
NTRK1	1.90959	0.000733372
TRIM15	1.90826	0.00787443
FKBP1B	1.90664	2.54e-05
IRF5	1.90453	2.16e-05
PCGF2	1.89788	0.00262322
DFNA5	1.89734	1.57e-07
TNFAIP2	1.89582	0.0456271
MCIDAS	1.89379	0.0177796
GRIN2D	1.89072	0.00215087
SLC14A2	1.88477	0.0141748
MCAM	1.88458	2.55e-05
NR4A1	1.88315	2.05e-05
MYRIP	1.88247	0.0354412
RASGRP3	1.88173	0.0124467
GLIS3	1.88111	0.000725137
TEAD4	1.87666	0.0234621
EFNA5	1.87428	0.00579855
SCARF2	1.87381	0.0256883
SGMS2	1.87376	0.00300912
DOCK1	1.87246	0.00914815
ZFP2	1.87152	0.0113887
MPP3	1.87069	0.00168653
PNMAL2	1.86934	0.00687509
IL7	1.86934	0.0131306
PLEKHA5	1.86742	0.0049098
EVC	1.86643	0.00773205
CHST1	1.86615	0.00821572
ATRNL1	1.86441	0.00353595
ARHGEF37	1.86333	0.00162809
C11orf63	1.8623	3.99e-05
GDPD5	1.86063	2.12e-06
LIPG	1.85481	0.00950882
TENC1	1.85372	0.00164003
TBC1D8	1.85275	4.45e-05
PAPLN	1.85249	0.000158439
ATP1A4	1.84917	0.0228446
LAMA2	1.83438	0.00476856
EDN2	1.83216	0.00292242
RAB13	1.82983	0.000105324
PRRT3	1.82901	5.65e-08
HOXB13	1.82167	0.00319781
SSTR2	1.82167	0.0065738
SPI1	1.82167	0.0268317
KIF26A	1.81926	0.0325672
TMEM145	1.81761	0.04107
FGD1	1.81354	0.000865294
IL17RE	1.8087	0.00159821
SAMD14	1.80505	0.0365946
DMTN	1.8004	0.000110084
SLC45A3	1.80007	0.00248984
CASQ1	1.79869	0.0422943
MUSTN1	1.79797	5.4e-05
KLF8	1.79628	2.5e-05
RHOU	1.79426	0.00369694
PLAGL1	1.79364	1.39e-08
GPR176	1.78842	0.000263506
BMP8A	1.78817	0.040066
PVRL1	1.78402	0.00528273
FAM81A	1.78333	0.0208358
SLC39A14	1.78088	4.6e-05
EFR3B	1.78038	0.00885176
KIF1A	1.78025	0.0287799
STON2	1.77937	0.02112
SPP1	1.77743	0.0272807
TTN	1.77625	0.00332998
PTPRG	1.77186	0.0090969
CERCAM	1.7712	0.00972721
MBL1P	1.76906	0.01921
TMEM110	1.76878	4.2e-07
ALDH1A2	1.76616	0.0416659
SPINT1	1.76491	9.6e-07
ROM1	1.76176	0.00153283
BAI2	1.76159	0.00626116
PGBD1	1.76096	1.82e-08
MEGF6	1.76	0.0030014
GCK	1.75978	0.0317504
SEPT5-GP1BB	1.75875	0.0171857
CSPG5	1.75786	0.0125573
TSPAN1	1.75729	0.0259417
ITGB5	1.75677	5.44e-06
NEK6	1.75429	0.00616838
ZNF853	1.75334	9.64e-05
CDR2L	1.74967	0.0184143
SLC8A3	1.74922	0.0126586
APOC1	1.74745	0.000591035
ZNF629	1.74641	6.25e-05
RASAL1	1.74628	0.0356341
TNFSF13B	1.74409	0.000157831
SLC16A5	1.74372	0.000113465
TP53I11	1.7418	1.08e-06
TOX	1.74126	0.0417953
SPTLC3	1.74025	0.00364584
UCP3	1.74019	0.000392288
CYP11A1	1.73866	0.00890104
TNFSF12	1.73829	2.9e-07
FAM211B	1.73192	0.00197019
TUBA3D	1.73165	0.00572692
GBGT1	1.72975	6.1e-05
CDK18	1.72712	0.000112101
F5	1.72661	0.00486811
FLVCR2	1.72559	7.98e-05
CNKSR3	1.7248	0.0281504
PRRT2	1.7238	1.23e-05
C17orf99	1.7233	5.86e-06
SOX30	1.7233	0.0020044
CLDN16	1.7233	0.00724335
LSR	1.72187	0.00403732
FAM92A1	1.71456	6e-05
PTK7	1.70954	0.00223779
CD200	1.70895	1.29e-07
ADAMTS10	1.70889	9.6e-07
BMP1	1.70704	0.000347402
MTMR11	1.7055	0.00179001
PTK6	1.70511	0.0143104
ITGA3	1.70489	0.0110772
TPPP3	1.70468	0.00462298
PLCB4	1.70468	0.0247661
GRIN1	1.70468	0.0268317
PLA2R1	1.70468	0.0377926
ASCL5	1.70468	0.0492482
SNX33	1.7002	3.7e-06
REEP1	1.69661	0.0483824
IGF2BP2	1.69587	0.0268495
SLIT3	1.69101	0.0277824
C10orf67	1.68911	0.00989457
GOLGA8F	1.68673	0.0132786
EBF4	1.68278	0.00527288
CHRNA5	1.68245	0.00153283
TNS1	1.681	0.0397689
PHLDB1	1.67941	3.35e-07
C11orf45	1.67746	0.00290608
CAPN2	1.67687	3.96e-08
ARHGEF17	1.67657	0.0293609
KLHL25	1.67576	4.2e-06
CST1	1.67069	0.00609006
ACER1	1.67069	0.0294937
NPDC1	1.66901	0.0032225
ASAH2B	1.66729	0.000690864
DLX4	1.66615	0.0100241
SLC2A4	1.66591	0.00290121
BAIAP2L1	1.66484	0.00232868
IL10	1.66339	0.0270501
INPP5F	1.6629	4.03e-07
EPHX4	1.66282	0.0333776
AKAP12	1.66252	0.0368048
GRASP	1.6507	4.62e-05
FEZ1	1.65039	0.00903994
IL1B	1.64624	0.0168633
IL18	1.64131	0.000866154
PINK1	1.64041	0.000544896
DOK4	1.64037	9.31e-07
HSPB2-C11orf52	1.64029	0.0212549
PON2	1.63894	0.00306447
PIWIL2	1.63865	0.0154794
SLC22A17	1.63656	5.66e-06
GRAP2	1.63459	7.26e-06
ARSD	1.63299	0.000609686
CPT1C	1.63132	0.00268021
ODF3B	1.63099	0.0136849
ST5	1.63057	0.000504556
CDH24	1.62647	2.23e-05
ABCA2	1.62354	0.00110764
GOLGA8T	1.61748	6.13e-05
CYP2S1	1.61608	0.0458199
IL36G	1.61519	0.0112404
PPARGC1A	1.61078	0.0384433
C14orf182	1.61024	0.00150573
NIPAL1	1.60759	0.00609891
CCDC149	1.60706	0.0121647
ITGB4	1.60246	0.00636953
CRIP1	1.60233	6.4e-05
PROX2	1.60176	0.0173488
C10orf105	1.59898	0.0436522
GOLGA8S	1.59731	0.00738961
C6orf147	1.59519	1.45e-05
SLC43A2	1.59007	0.0213879
CYP3A43	1.58844	0.033963
RASGRF1	1.58769	0.00266436
SERTAD4	1.58769	0.0359501
SSTR3	1.58728	0.00582572
TNFRSF25	1.58353	4.82e-06
DLGAP3	1.58314	0.0189909
NPM2	1.576	0.00409803
ALDH7A1	1.57553	8.32e-05
NELL2	1.57424	0.0154066
SDC4	1.57402	5.48e-05
TMEM158	1.57373	0.0173488
CCDC74A	1.57186	9.24e-05
SPR	1.56835	0.0289197
ERBB3	1.56602	0.00239431
KRT8	1.56599	0.00153469
ZFHX3	1.56503	0.000641212
PRR5L	1.56489	0.00248445
SYN2	1.56258	0.0165385
TMEM17	1.56047	0.00669129
FAM159A	1.56032	0.000463705
SH2D2A	1.55796	5.65e-07
FHL3	1.55794	4.88e-05
PKP1	1.55729	0.024982
DNM1P41	1.5569	0.0443376
C3AR1	1.55548	0.0104997
FAM174B	1.55279	0.00182574
SPATA6	1.55185	3.4e-05
IRS2	1.54941	0.00124665
KLK1	1.54916	0.0364866
CRIP2	1.54916	0.0454069
HPGDS	1.54442	0.0260667
REEP2	1.54298	2.47e-08
MYO1E	1.54137	0.00123089
ZCCHC18	1.54129	0.000397735
GMPR	1.5379	0.00185819
TMEM200A	1.53625	0.0197081
KRMP1	1.53508	0.0385867
PLS3	1.53503	0.00123272
CSPG4P8	1.53286	0.0107198
GJC1	1.53248	0.0447502
FANCL	1.53106	1.53e-05
SHB	1.52744	0.0132458
CCDC141	1.52735	0.000356218
ZBTB8A	1.52478	0.00159669
KCNQ2	1.5233	0.00344822
PACRG	1.5233	0.0403407
CCRL2	1.51957	0.000172791
LHFPL2	1.51682	0.035555
ALS2CL	1.51276	0.00550314
IL17RC	1.51234	0.00459521
CARNS1	1.51051	0.00555791
PTRF	1.51012	0.0160026
MLLT4	1.5097	0.00182246
INSR	1.50646	0.0090969
PLEKHG3	1.50468	0.045594
KCTD11	1.50429	0.020822
THNSL2	1.50338	0.00354485
DSE	1.49586	0.00179001
CD9	1.49233	0.000560955
ZBTB46	1.48897	0.00445647
LHX1	1.48819	0.0413414
CXCR7	1.48785	0.00442807
GSG1L	1.48477	0.0430431
MSANTD3-TMEFF1	1.47955	0.00743775
TBC1D16	1.47646	0.000354493
CBLN3	1.47622	2.1e-05
KCNJ12	1.47299	0.0167264
SYNPO2	1.47127	0.000554214
C1QTNF1	1.47069	0.0368048
RAPGEF4	1.46913	0.0338136
TPPP	1.469	0.0102437
CAMK2N1	1.46262	0.0276264
ETV4	1.46245	0.0119243
WBP5	1.46215	3.09e-06
ANPEP	1.46077	0.00154858
CEACAM19	1.45779	0.0187278
PRDM11	1.45684	0.0142475
KHDC1	1.45393	8.13e-05
ZNF223	1.4538	0.0176099
WASF1	1.45324	0.000271768
CEP112	1.45202	4.4e-05
WHAMMP2	1.45045	5.99e-05
ZNF311	1.44705	0.0125981
PPP1R26	1.44239	0.00741208
ZBED2	1.43832	0.0288069
HES7	1.43577	0.0242106
AQP7	1.43535	0.0125321
KLF7	1.43464	5.11e-07
C5orf54	1.43256	8.25e-05
ESAM	1.4288	0.0431472
NOTCH1	1.42805	0.00890104
RASGEF1B	1.42344	0.00275702
PHLDA2	1.42153	0.0231853
HVCN1	1.41782	0.000356218
ARHGEF35	1.41536	4.71e-05
ICA1	1.41487	0.000109762
LOXL3	1.41315	0.00724335
CDC42BPB	1.40786	0.00210683
CDH23	1.40641	0.0481923
GPC5	1.40631	0.0437006
ZBTB47	1.40493	0.00162142
RBMS2	1.40205	0.00404818
FNDC4	1.40111	0.0301296
ARHGEF25	1.39977	0.0014683
BFSP1	1.39328	0.00225348
WWTR1	1.39314	0.00210683
TRIM45	1.39306	0.000835264
PTMS	1.38615	2.36e-07
GOLGA6L4	1.38295	0.0102848
GLS2	1.38205	3.45e-05
CYFIP1	1.3816	0.000499465
SRGAP3	1.38115	0.00982169
INCA1	1.37956	0.00519733
DOC2A	1.37827	0.0278272
GADD45G	1.37631	0.0328615
RAET1K	1.37511	0.0243454
BACH2	1.37502	0.00840613
VDR	1.3745	0.00679457
CCDC24	1.37176	0.0177082
NPTX2	1.37171	0.0373485
ZNF575	1.36377	0.00881244
RASSF4	1.36329	0.00185387
PHLDB2	1.36271	0.000287894
OXER1	1.36258	0.0392158
COL9A2	1.36072	0.00195578
GLIPR1	1.35794	5.72e-05
LHX2	1.35729	0.00661782
TRIM67	1.35729	0.0391244
KANK3	1.35614	0.00278356
EVI5	1.3547	0.00104392
KLHDC7B	1.35397	0.00259377
S100A11	1.34887	6.23e-07
TMEM88	1.34686	0.0292225
GSN	1.34619	0.000542142
FAM109B	1.34618	0.00055721
PLEKHN1	1.34609	0.0221937
NID1	1.34486	0.00979193
ABCG1	1.34443	0.0333776
MST1R	1.34053	0.0257014
CD151	1.33781	4.46e-06
TMEM198	1.33649	0.00171462
TNFRSF4	1.33514	0.028026
FBLN7	1.33493	8.01e-08
C1QTNF6	1.33441	0.00139632
GAL3ST4	1.33278	0.000146236
CA13	1.33186	0.00456071
C1orf220	1.32952	0.00168653
LAMB3	1.32886	0.0191062
CTTNBP2NL	1.31989	0.000613086
CSNK1G3	1.31893	8.93e-07
CXCL16	1.31791	0.028001
SEC14L2	1.3171	3.58e-05
ANKRD19P	1.31517	0.0451787
MAN1C1	1.31091	0.00640472
PIK3IP1	1.30906	0.017651
BACE1	1.30836	0.0161473
SMAD7	1.30285	0.0170022
SEPN1	1.30217	6.46e-06
LRRC66	1.29821	0.00697514
TUBA8	1.29266	0.0163084
AFF2	1.2901	0.00169515
GPR135	1.28934	0.0279503
GABRA3	1.28932	0.0167264
MYO10	1.28844	0.0392158
CA11	1.28499	0.000135515
SMO	1.28431	0.00438437
CCDC136	1.28259	0.000284971
FAM66B	1.28075	0.0094313
CPNE7	1.27981	0.0436522
TNFSF12-TNFSF13	1.27887	0.0254743
LAMA3	1.27769	0.0256052
PTPRVP	1.27741	0.0125217
GABBR1	1.27661	2.16e-06
KCNC3	1.27569	0.0166065
CTSF	1.27267	0.0322777
RFPL1S	1.27004	0.00971878
LPXN	1.268	4.19e-07
ARMCX1	1.26675	0.000299958
PIWIL4	1.26653	5.66e-05
PRICKLE4	1.26553	0.0183358
GSTO1	1.26483	7.43e-08
ACOT4	1.26442	1.08e-06
MLF1	1.26424	9.75e-05
IGSF22	1.26269	0.00821123
DSG2	1.26038	0.00153283
HIVEP3	1.25049	0.000223377
CXXC5	1.2465	0.029885
ZNF697	1.24483	0.00362905
VSIG10L	1.24419	0.0033271
GSTO2	1.24303	0.000364933
SMKR1	1.24069	0.0364866
C1orf210	1.24029	0.0195059
PPP1R3F	1.24016	0.00488246
GREB1	1.23877	0.00213093
ASAP3	1.23369	0.0247661
PROCR	1.23276	0.0039823
CTLA4	1.23033	0.00669572
GOLGA6L5	1.22884	0.000256392
TDRD7	1.22767	0.00169573
PACSIN3	1.22631	0.000943965
TUFT1	1.22569	9.19e-05
DHRS12	1.22458	0.000238148
GPR125	1.22228	0.000384662
ITGAE	1.22162	0.00928663
GOLIM4	1.21796	7.87e-05
SEZ6L2	1.21795	0.0453896
TEAD1	1.21635	0.0439342
MEST	1.2151	0.0385835
CTNNA1	1.21385	0.00101299
TMEM27	1.20571	0.0377782
CTSB	1.20332	5.9e-06
NAPSA	1.20135	0.0286026
SLC35F2	1.19954	1.18e-05
NEK5	1.19818	0.0256052
BEGAIN	1.19597	0.0455473
DCST2	1.19593	0.048788
PPM1N	1.19483	0.00506029
PARP9	1.19059	0.0345791
C11orf95	1.18997	0.0061921
CHIT1	1.18867	0.021409
TNFRSF13B	1.18769	0.00212
PGLYRP3	1.18769	0.0225066
ADCY3	1.18731	0.00120708
ZNF219	1.18682	0.0238563
YPEL2	1.18545	0.00014476
ZCCHC24	1.18006	0.000591035
CTIF	1.1778	0.0006008
GATA3	1.17519	0.000777144
SPIRE1	1.17463	0.00160626
AFAP1	1.17404	0.00841796
PLP2	1.17402	1.17e-06
TRO	1.16897	0.000690864
ADAP1	1.16682	0.0289197
KREMEN1	1.16625	0.040669
KAZALD1	1.16612	0.00856671
STX1A	1.16493	0.0174784
RLN2	1.16492	0.000384457
ADAM22	1.16319	0.039026
PPP2R3A	1.16243	0.00750342
FKBP9	1.16148	0.0345766
PLEKHA7	1.1613	0.0209898
FADS3	1.1612	0.000288224
IL18R1	1.16074	0.00184147
VTN	1.15729	0.0374775
ADRA2A	1.15729	0.0453256
ADD2	1.15678	0.0240502
RAB40B	1.15513	0.0317167
MNS1	1.15479	0.04772
ITGA5	1.1505	0.00591526
CRTAP	1.14429	4.95e-06
BTLA	1.14326	1.06e-05
MEX3B	1.14217	0.00354485
AMOT	1.14164	0.00313662
RARA	1.14011	0.00218779
CD44	1.13813	0.00185387
C16orf45	1.13674	0.000246952
TNK2	1.13641	0.00679352
SLC35D2	1.13217	0.0053067
EGR3	1.13091	0.0183437
PTGIR	1.1307	0.00711591
AKAP6	1.12848	0.0110621
MID1	1.12812	0.0116406
ST7	1.12734	3.07e-05
LEPREL4	1.1245	0.00207877
BTBD18	1.1233	0.00358364
PSD2	1.1233	0.0408373
HGSNAT	1.12081	0.000117149
C3	1.11965	0.0356025
IVNS1ABP	1.11856	0.0445903
ARHGAP10	1.11633	1.76e-06
SLC25A53	1.11367	0.0177082
LGALS1	1.11285	0.0153061
AJUBA	1.11143	0.00478989
ZC2HC1A	1.11038	0.0112003
ZC2HC1C	1.10983	0.00190336
GPR55	1.10595	0.0376932
LAG3	1.10555	0.0462614
FMNL3	1.10263	1.29e-06
PHC1	1.10218	0.000195912
UNQ6494	1.102	0.0259435
HEG1	1.10198	0.00288214
FLNA	1.1015	0.00216926
TRANK1	1.10128	0.0134827
SLC46A1	1.1007	0.00168653
ACSL1	1.0997	1.59e-06
NRIP1	1.09779	0.000775685
NOTUM	1.09379	0.026263
CA2	1.09357	0.00220358
SYDE1	1.08975	0.0429435
MYRF	1.08679	0.0431472
LYSMD2	1.08569	0.000132177
ARHGEF34P	1.08186	0.031138
KRCC1	1.07975	0.00215087
TMIGD2	1.07958	0.00116918
BCL9L	1.07796	0.00813949
APOBEC3F	1.07753	2.86e-05
IL2RB	1.07513	8.69e-06
OCIAD2	1.07407	9.33e-07
MAP7	1.07168	0.00332998
GDF6	1.07069	0.0377866
SGCE	1.07036	0.043642
PARK2	1.07006	0.0111103
NBL1	1.06998	0.0328752
MAML3	1.0675	0.00992185
TRIP10	1.06736	0.000140932
TTC8	1.06564	0.000363231
ME3	1.06455	0.00886571
ROBO3	1.06304	0.00794343
SLC35G2	1.06046	0.0284594
NPL	1.05761	0.0117823
COPRS	1.05586	0.000316452
USP35	1.05417	0.000983734
ACSL4	1.05335	4.88e-05
SORBS1	1.05274	0.00905948
CCDC88A	1.05188	5.68e-06
SLC9A5	1.04717	0.0125573
ZG16B	1.0444	0.0125321
IDUA	1.04299	0.039026
HSPB1	1.0409	0.0431223
MT2A	1.0408	0.0136676
KLK11	1.04029	0.000609567
CBFA2T3	1.04029	0.0242106
SYT7	1.04029	0.0388347
APLP1	1.03868	0.0258872
TSPAN7	1.03828	0.0260163
NAV1	1.03522	0.0165385
GTF2IRD1	1.0343	0.011636
DNMT3B	1.03335	0.0039823
GOLGA8O	1.03222	0.0376301
TIGD2	1.02833	0.0247661
CROCCP3	1.02796	0.00318878
PRSS16	1.0258	0.00066639
AGPAT2	1.02216	0.0368048
SLC29A3	1.02044	0.0333706
ERCC6	1.01798	0.00910661
RHBDD2	1.01675	0.00638535
TUBA3FP	1.01531	0.0129132
DUSP22	1.01424	0.000157831
ARHGEF5	1.01387	0.0170261
LST1	1.00971	0.00321148
TMBIM1	1.00963	1.57e-05
ONECUT1	1.00631	0.00214725
FRMD1	1.00631	0.0288847
ZNF358	1.00556	0.0339804
SYP	1.00529	0.0178916
FOXP4	1.00442	0.0447837
SACS	1.0042	0.00115706
PRKD3	1.00405	0.000506585
FAM109A	1.00361	0.00567098
MLLT11	0.99989	0.000465686
ZFYVE28	0.99891	0.0182255
MPZL2	0.99758	0.0170166
CD2	0.99592	1.86e-06
DYRK3	0.99455	0.00921202
ZNF768	0.99162	0.00123495
ZCCHC14	0.99087	0.00168653
MICAL2	0.98786	0.00209814
ADAMTSL5	0.98786	0.0235317
WIF1	0.98769	0.0361092
SHOX2	0.98769	0.0434635
ZMAT1	0.98499	0.031806
MICALCL	0.98465	0.0048513
ENO3	0.98309	0.000801796
GRAMD3	0.98012	0.000650961
SLC1A4	0.97519	0.00671268
TRIM3	0.97498	0.000777144
MAST4	0.97096	4.95e-06
SLC37A2	0.96833	0.0311878
CHST10	0.96647	0.000933058
PLEKHG5	0.96647	0.0352294
NRIP3	0.96618	0.00983395
TPST1	0.9659	0.00984143
NR1D2	0.96522	0.000130215
TRPV3	0.96502	0.00698996
WHAMMP3	0.96433	0.029481
PDE4DIP	0.96401	0.00349251
KLHL22	0.96341	0.0202327
PVR	0.96217	0.000417598
MARCH3	0.96217	0.0142952
YPEL5	0.96073	0.000333043
RSPH3	0.95538	0.00579281
DNPH1	0.95457	0.00957483
V_alpha_immunoglobulin	0.95422	0.0154447
RNASEL	0.95394	0.00101299
MAST1	0.95183	0.0333512
ASIC3	0.95051	0.0138746
CGN	0.94865	0.02112
PLEKHG4	0.94776	0.000794136
BTN2A3P	0.9455	0.0048513
LFNG	0.94445	0.0131594
C20orf112	0.94347	0.00039704
FAM102B	0.94282	0.00125644
ARMC12	0.94124	0.00677515
EPHB6	0.93833	0.0156531
S100A5	0.93491	0.02112
BCAR3	0.93429	0.0372609
ANKH	0.93407	0.00820098
PMFBP1	0.93265	0.0180349
FAM63A	0.93263	0.000256467
PLEKHM3	0.92961	0.00238149
RUNX1	0.92819	0.000464199
PDK2	0.9279	0.00276677
SLAMF1	0.92754	0.000759028
SRC	0.92609	0.0432898
RGCC	0.92441	0.0102659
SPRR2G	0.9233	0.000485702
MYO1C	0.92174	0.0148196
ARMCX4	0.91886	0.0352294
DISP1	0.91717	0.00903852
KDM6B	0.91551	0.0445868
RHBDF2	0.91506	0.0025503
FAM120C	0.91141	0.0032225
HECTD2	0.90971	0.000771332
SLC9A7	0.9081	0.000432195
SUGT1P1	0.90809	0.034132
FAM114A1	0.90288	0.0382091
GAREML	0.9019	0.00662622
ITM2C	0.90183	3.18e-05
SERPINB6	0.89904	0.00519733
RIN3	0.89685	0.0198789
SCN8A	0.89496	0.0246886
NRBP2	0.89316	0.00659182
SERPINI1	0.89274	0.00671155
AS3MT	0.89266	0.00281284
C4orf32	0.8914	0.0111826
DLGAP4	0.89126	0.00438437
TCEAL3	0.88958	0.000195364
GPR137B	0.88951	0.000458133
ABCA3	0.88757	0.00235765
RDX	0.88757	0.00243562
TXNRD3	0.88756	0.028311
PDLIM7	0.8834	0.0281264
PKIA	0.8832	0.00902644
NDFIP2	0.88118	0.00232868
REL	0.88052	0.0243555
H6PD	0.8774	0.00971616
MORN3	0.87724	0.0476651
HYAL3	0.87627	0.000287303
CPT2	0.87573	0.00642792
NCF4	0.87572	0.00922842
COPZ2	0.87453	0.0179518
SH2B3	0.87251	0.0127542
PSD	0.87156	0.0249017
FGD6	0.87007	0.0276844
MCC	0.86993	0.0121922
C8orf37	0.86936	0.000305279
EPM2A	0.86933	0.00533633
BPHL	0.86853	0.039026
FCHO2	0.86402	0.0340721
C15orf52	0.86381	0.0392158
PRKCZ	0.86194	0.00309046
ELK3	0.8607	0.00393323
ABHD6	0.85946	0.039026
GTF2I	0.85904	5.97e-06
PAOX	0.85854	0.00228094
AKIP1	0.85785	2.25e-06
UACA	0.8563	0.024342
CMTM4	0.85589	0.0300571
CCDC92	0.85558	0.00525059
WDR17	0.85528	0.0272075
FDX1	0.85518	2.04e-06
C12orf66	0.85176	0.00131765
GGACT	0.85105	0.039026
TCEAL1	0.85075	6.21e-05
UEVLD	0.85042	0.00183502
TMEM216	0.85025	0.000152208
DDR1	0.84977	0.00579281
PFKFB3	0.84924	0.0472688
PPP3CA	0.84836	0.00114492
PCED1A	0.84527	0.000380572
ID3	0.84503	0.0397705
FBXL17	0.84467	0.00362905
SLC29A1	0.84348	0.0158221
SSH3	0.84334	0.000466071
HCN3	0.84277	0.00014622
SMIM10	0.84266	0.00483015
AMACR	0.84207	0.00107421
UPP1	0.84124	0.034118
KCNN4	0.83941	0.00369694
RAB23	0.83801	0.030674
ZNF34	0.83758	0.0148501
SMIM14	0.8363	0.00207877
RNF135	0.836	0.00010046
hADV36S1	0.83422	0.0375602
C20orf194	0.83403	0.0377782
CTSA	0.83392	0.00032803
RILPL1	0.83226	0.0033271
C12orf57	0.82738	0.00900032
PEA15	0.82722	0.00438437
ERCC6-PGBD3	0.82529	0.0434063
ACVR1B	0.82485	0.016973
ZNF821	0.82219	0.00272653
FGGY	0.82049	0.000466071
SLC25A24	0.82037	0.0172833
SIPA1L3	0.81912	0.0371322
HDAC11	0.81794	0.0126996
OSBPL8	0.81778	0.000169425
IFNLR1	0.81607	0.0265963
APOBEC3D	0.81564	0.00798213
ZSCAN9	0.81259	0.00406752
PAK1	0.80983	0.000499465
IER5	0.80631	0.00130049
ADAM33	0.80631	0.0356709
SAMD4A	0.8051	0.0289197
C1orf21	0.80471	0.0295361
KLF11	0.8032	0.040669
DNAJB5	0.80232	0.00173959
C3orf67	0.80095	0.0125321
SMIM19	0.79928	0.00015396
FAM102A	0.79909	0.00760681
IFNAR2	0.79791	0.000436546
KLHL42	0.79562	0.00933284
AQP11	0.79485	0.0161722
GLB1	0.79453	4.6e-05
HYI	0.7931	0.00947779
PPP1R16B	0.79303	1.54e-05
APLP2	0.79265	5.7e-05
KCNC4	0.79217	0.026265
UBE2Q2P1	0.79102	0.0157968
FUT8	0.79093	0.00733449
MAP3K7CL	0.79081	0.00557438
EXD2	0.79056	1.26e-05
PLAGL2	0.79052	0.00210766
FGFRL1	0.78895	0.00433163
ZFP36L1	0.78877	0.0311908
MINPP1	0.7865	0.00494637
ZSCAN31	0.78547	0.00626116
WDR35	0.78538	0.0392158
ANGEL1	0.78466	0.000226629
MAP3K10	0.78382	0.0270411
CEP120	0.78279	0.00330459
C7orf31	0.78171	0.0234621
ZNF516	0.78131	0.039464
SYNJ2	0.78099	0.000495651
FDX1L	0.77983	0.0458066
LRP2BP	0.77978	0.0404686
ARG2	0.77843	0.0161894
CD82	0.77751	0.00362905
FHOD1	0.77505	0.0017821
SEMA4C	0.77421	0.0288546
GPR174	0.77313	0.0333706
IL21R	0.77254	0.000356218
FAM227B	0.77097	0.0483908
RARG	0.77023	0.00349998
C14orf28	0.76936	0.0353148
SALL2	0.76606	0.00478761
KCTD21	0.76324	0.0478513
BTBD8	0.7626	0.00175757
VAT1	0.76206	0.00223322
CAPS2	0.76047	0.0177248
TRAF1	0.75946	0.00245019
EXPH5	0.75886	0.0059855
DMXL2	0.75865	0.0486963
C11orf80	0.75694	0.00191033
LRRC16A	0.75686	0.00352407
RANGAP1	0.75653	0.00579265
NT5DC3	0.7563	0.0238563
SLC20A2	0.75628	0.0281639
AMIGO2	0.75522	0.00613928
ST6GALNAC6	0.75344	0.0127531
S1PR2	0.75278	0.0126188
PAG1	0.75238	0.000983734
FAM69A	0.7499	0.0039823
DENND1B	0.74924	0.00453782
PPOX	0.74906	0.000587947
PITPNM2	0.74791	0.0431408
PCED1B	0.7468	0.00212061
MCF2L2	0.7453	0.00468805
RRAS	0.74497	0.00292242
AGFG2	0.74434	0.00466192
FAM221A	0.74342	0.00921202
NIPA1	0.74211	0.0105745
DUSP23	0.74207	0.0102848
SUPT3H	0.7408	0.00329004
IQGAP3	0.7403	0.00442454
CDC42EP4	0.73914	0.00655931
FSD1	0.73737	0.000195927
STAG3	0.73645	0.015237
SLA	0.73479	0.0147289
SFXN3	0.73322	0.036267
ACTN4	0.73307	0.0122983
CBRC7TM_40	0.73067	0.0364222
FAM160B2	0.73012	0.000933058
CTSZ	0.72946	9.19e-06
GRAP	0.72874	0.0481923
AFAP1L2	0.72864	0.0178547
ENDOV	0.72844	0.0421206
SYNGR2	0.72824	0.00492107
AVPI1	0.72609	0.0331226
SMIM3	0.72545	0.0116318
ANKRD50	0.72398	0.0373485
TNK1	0.72396	0.034017
PRSS57	0.7233	0.00727121
IFT27	0.72245	0.0259417
ANKRD13B	0.72227	0.0178436
ITGAV	0.71786	0.00765802
CERK	0.7157	1.06e-05
POMT2	0.7107	0.000733372
KDM4D	0.70947	0.0418054
AGAP3	0.70836	0.0232289
RFX2	0.70697	0.0261868
CLSTN3	0.70639	0.00399942
ARMCX2	0.70573	0.000477379
UGDH	0.70535	0.00652365
H2AFY2	0.70373	0.0380237
GRINA	0.70371	0.000528937
LAPTM4B	0.70317	0.0164818
PBX3	0.70226	0.000192216
PIGX	0.70206	0.000116148
PDCD4	0.69945	0.015174
TMEM14A	0.69671	5.63e-05
NCEH1	0.69651	0.00313662
SCCPDH	0.69573	0.00310256
PPM1F	0.69551	0.02112
FBN1	0.6939	0.0177082
NT5M	0.69368	0.0241808
MID2	0.69254	0.0142637
SGCB	0.68677	0.00587137
FAM131A	0.68588	0.0299384
KCNQ5	0.68475	0.00787443
MLYCD	0.68394	0.024634
GTF2IP1	0.68392	0.0149407
AHRR	0.68276	0.0334521
LETM2	0.68272	0.0309554
ANXA4	0.68087	0.00519733
TCEAL4	0.6806	0.0416659
FAHD2CP	0.67773	0.0227399
SLC24A1	0.67767	0.0119243
THUMPD2	0.67729	0.00697083
ZC3H7B	0.67472	0.0296027
EPHX2	0.6745	0.0431223
ATP8A1	0.67314	0.0133788
ARHGEF39	0.67218	0.0165298
FAM171A1	0.67104	0.0180689
PDLIM5	0.67065	0.0272807
GRN	0.66853	0.0212773
TMCC2	0.66743	0.02112
RAC3	0.66713	0.0119041
JOSD1	0.66151	0.000477746
TRD	0.66006	0.0289197
EED	0.65974	0.0159002
FOXP1	0.65713	0.000310132
TRIM22	0.65644	0.0170166
GABARAPL1	0.65177	0.00185617
LBH	0.6515	0.00251636
CDKN2C	0.65053	0.0142637
ZNF48	0.6495	0.040295
PACS1	0.64938	0.0120566
VANGL1	0.64905	0.0393517
AAMDC	0.64899	0.0154794
TMCO4	0.64872	0.0028228
ACAD11	0.64716	0.0235164
ECE1	0.64643	0.0220153
ITPR2	0.64594	0.00117385
C2CD2	0.64581	0.0231557
POU2F2	0.64457	0.0104888
USP40	0.64451	0.0151493
NAALADL1	0.64351	0.0145004
AV2S1A1	0.64233	0.0466363
DNMBP	0.64189	0.0439047
LIMK1	0.63915	0.0333706
TUBA3C	0.63901	0.0131299
FBXO24	0.63818	0.0212053
ATP6V0A2	0.63816	0.0181357
CAMK1	0.63631	0.00496355
NRSN2	0.63309	0.00962189
AAK1	0.63053	0.0227399
TRA@	0.62958	0.0168633
CCDC112	0.62915	0.0136032
NFU1	0.62885	0.00369694
STK38L	0.62862	0.00557122
THG1L	0.62838	0.00153656
GRK4	0.62811	0.024342
TPM1	0.6195	0.0390152
MLKL	0.61681	0.00207691
GALNT2	0.61605	0.0112404
CUL7	0.61506	0.0125321
ABHD14A	0.61482	0.0082424
ADCK2	0.61373	0.00215995
INPP1	0.6122	0.0120701
ANKRD26	0.61086	0.0110242
TCTN2	0.61075	0.018098
TTC7A	0.61051	0.00249861
TYSND1	0.61035	0.0368974
TMEM170B	0.60811	0.0206594
APOBEC3C	0.6075	0.0113003
CPEB3	0.60694	0.014443
PHTF1	0.60506	0.00585875
WHAMMP1	0.60382	0.0200749
SLC31A2	0.60376	0.00726525
PRKCA	0.6032	0.0030126
SRD5A1	0.60125	0.00851982
LIMA1	0.60043	0.00372159
ZNF791	0.59825	0.0335739
SMYD5	0.59609	0.000695302
TRABD2A	0.5929	0.00253164
MPP6	0.59214	0.00336537
TCP11L1	0.59127	0.00120531
IQCG	0.58799	0.0156909
MKNK1	0.5876	0.000531456
THEM4	0.58618	0.0249053
HEATR5A	0.58561	0.0104997
TSPAN14	0.58473	0.0161722
TFEB	0.58464	0.0102659
SLC40A1	0.58304	0.029885
RAB11FIP3	0.58279	0.0392158
C14orf93	0.58139	0.0244608
LXN	0.58082	0.00453782
TMEM91	0.58077	0.0210868
ZFAND5	0.57809	0.00195578
MSRB2	0.57793	0.00631681
C9orf64	0.57501	1.76e-05
CMTM6	0.57469	0.00330459
ATL3	0.57423	3.6e-05
LACC1	0.57421	0.0177794
APLF	0.5736	0.0181357
HIVEP1	0.57307	0.04107
CFLAR	0.57023	0.00442454
WDR75	0.56983	0.0049292
CHMP4B	0.56959	0.00816464
NF1	0.56755	0.0170334
CD6	0.56659	0.00555791
LCP2	0.56622	0.00929198
EMILIN2	0.56462	0.035555
ACTR3B	0.56389	0.03208
GATAD1	0.56138	0.00837301
SIAE	0.55887	0.0260772
AIM1	0.55739	0.0031013
hADV38S2	0.55676	0.0174784
MAGED2	0.55509	0.0465955
HLCS	0.55458	0.012216
PRKCD	0.55286	0.00517021
NSMCE1	0.55189	6.04e-05
KIF1C	0.54947	0.0235164
LAPTM5	0.5465	0.00693623
IFT74	0.54445	0.00165249
ANKMY1	0.54293	0.000902571
SLAIN1	0.54216	0.00787007
NHLRC3	0.5419	0.00881244
KCTD12	0.54174	0.0339466
SLC15A4	0.54115	0.000528188
ZFYVE19	0.54111	0.0010716
STK17B	0.5397	0.0364866
FBXW11	0.53967	0.00014797
LRIG1	0.53864	0.0167217
HEBP1	0.53696	0.0473109
C19orf12	0.53695	0.0102987
PLOD3	0.53649	0.00459374
KPNA1	0.53595	0.00110764
CCDC111	0.53472	0.0436831
STX17	0.53451	0.00921447
DPYSL2	0.53171	0.0257542
EEF2K	0.53168	0.0364866
DYNC1I2	0.52906	0.00931824
SNX9	0.52837	0.0250308
FAM210B	0.5281	0.0180349
FMNL1	0.52733	0.0432197
AV8S2	0.52671	0.0109645
AGO4	0.52622	0.0253853
PTPN6	0.52404	0.000304993
BBS4	0.52134	0.00265247
TMEM87B	0.51964	0.0203166
APPL2	0.51916	0.039154
ACP5	0.51815	0.0284954
LDLRAP1	0.51797	0.0438523
ADAMTS6	0.51794	0.0204238
LYPLAL1	0.51783	0.00765084
FANCF	0.51521	0.0402756
TTC39C	0.51486	0.00248568
PHLPP1	0.51445	0.00369694
AGO3	0.51348	0.0448269
MAML2	0.5133	0.0224899
ARHGEF6	0.51014	0.0102846
MAGEH1	0.50674	0.0432197
MKRN2	0.50615	0.00609891
ARL2-SNX15	0.50451	0.0046996
GGT7	0.50198	0.0209146
ABR	0.5013	0.00519733
ARL2BP	0.50043	0.0179464
BMP2K	0.50017	0.0256052
TRMT1L	0.49877	0.012216
PLD2	0.49867	0.00865226
GRAMD4	0.49679	0.00539072
ATXN1	0.49643	0.0333162
KIF3C	0.49626	0.0350076
CTPS2	0.49429	0.0202804
FOXO1	0.49352	0.0323053
SV2A	0.49216	0.00404624
LIMD1	0.49178	0.0169869
SARM1	0.49107	0.045815
XXYLT1	0.49021	0.0421981
LRTOMT	0.48879	0.0222385
ARID1B	0.48872	0.00497259
NAB2	0.48673	0.0471797
ACACB	0.48672	0.0156681
CAMK2D	0.48322	0.0336356
PTPDC1	0.48274	0.0352799
RNF11	0.48097	0.00496786
DNAJC1	0.47843	0.00421987
CMC4	0.47797	0.000233445
EML3	0.47511	0.0231011
METTL21A	0.47466	0.0237009
TUBG2	0.47294	0.0122764
WDFY2	0.47032	0.0338064
SDCCAG8	0.46969	0.00498604
STARD3	0.46943	0.0419342
RHOF	0.46874	0.0125517
OSGEPL1	0.46425	0.0475694
LIPA	0.4631	0.00621917
TMEM42	0.46285	0.0164925
STARD9	0.46084	0.0147289
UBQLN4	0.46083	0.039026
BCOR	0.45871	0.0169572
MAST3	0.45857	0.048788
POGK	0.45605	0.0107595
B4GALT1	0.45327	0.00572317
ATP8B2	0.45128	0.000499669
ZBTB24	0.4508	0.0358168
T-Cell_Receptor_V-alpha_region	0.44967	0.0452416
NT5C3B	0.44799	0.000460019
TRIM68	0.44723	0.0121966
STX7	0.4455	0.00881244
ETAA1	0.44129	0.032019
MSANTD3	0.4381	0.00562499
POFUT1	0.43767	0.00229368
FYN	0.43667	0.0186201
VOPP1	0.43615	0.00260799
KIFAP3	0.43286	0.00131963
ACAA2	0.43263	0.0253853
ALKBH2	0.43158	0.0135483
GRSF1	0.43149	0.0281397
ACAD10	0.42999	0.0103509
COMMD6	0.42885	0.0392551
PHYH	0.42806	0.0313038
DDI2	0.42501	0.0121647
TMEM19	0.42305	0.0312933
ENTPD6	0.42286	0.0142952
TTLL4	0.41927	0.0314063
HTRA2	0.41879	0.00873655
RIF1	0.41759	0.0159176
TRIM27	0.4174	0.0434635
TBRG1	0.41443	0.00293181
DHRS4L2	0.41361	0.00785485
TCRA	0.41349	0.0245009
IPP	0.41306	0.00603405
SMG9	0.41179	0.0246886
RRNAD1	0.41049	0.0247325
TMEM109	0.41025	0.0389131
RALA	0.40712	0.00892995
NUDT4	0.40676	0.00494637
TEP1	0.40263	0.00424461
FBXW4	0.40254	0.0434473
TESK2	0.40126	0.0154794
RIC8B	0.39918	0.047754
MFSD6	0.39655	0.0333776
WDTC1	0.39601	0.00216675
ZSWIM1	0.38998	0.0405479
SLX4IP	0.38939	0.0390152
STK36	0.38851	0.0375092
MEAF6	0.38762	0.0284718
MCM9	0.38734	0.00758228
ETHE1	0.38715	0.0165385
MAP3K12	0.38517	0.0206661
RAB22A	0.38364	0.0308725
CINP	0.38284	0.0134793
PPAPDC1B	0.38247	0.0490012
ARNTL	0.38209	0.0453896
MUTYH	0.38102	0.0355197
VPS13D	0.37841	0.032019
CD63	0.3783	0.0355692
UBL7	0.37532	0.03596
TRAC	0.37428	0.00701313
TAGLN2	0.37325	0.0152719
TSC22D2	0.37272	0.0241011
STAT5A	0.37272	0.0246131
LPCAT4	0.37258	0.0470146
MEX3C	0.37203	0.0172011
TBC1D5	0.3714	0.0458066
UBE2Z	0.37062	0.00146215
CAMK4	0.36994	0.0349667
TRIM44	0.36991	0.0326403
AGL	0.36896	0.0279042
RNF141	0.36867	0.0335739
MTMR2	0.368	0.0104539
TLN1	0.36481	0.0254892
CDV3	0.36451	0.0224797
SLC25A15	0.36263	0.032019
NUDCD3	0.36093	0.00494536
FAM115A	0.35869	0.0178539
TMEM219	0.35845	0.046604
SUMF2	0.35575	0.00570435
TCR-alpha	0.35372	0.0348177
KAT2A	0.35287	0.00622453
HERPUD2	0.35185	0.0373485
UXS1	0.35184	0.0182311
NRM	0.34263	0.0317167
RUNX3	0.3383	0.0334521
CTNNB1	0.33778	0.0165385
PPIP5K1	0.33604	0.0497626
CHTF8	0.32846	0.029885
SLC25A38	0.32656	0.0330132
RAC1	0.3213	0.0154794
C9orf123	0.31918	0.0189909
INTS6	0.31511	0.0155385
BEX4	0.31225	0.0406869
CHD4	0.30458	0.020006
RNPEP	0.30311	0.01753
CNDP2	0.30151	0.00433857
IFT20	0.29246	0.0348177
ARMCX6	0.29062	0.0340711
IKZF1	0.28697	0.0427113
SS18	0.2857	0.0237707
MAPKAPK2	0.28152	0.0377782
CDYL	0.26923	0.0153531
ATRAID	0.26342	0.0215449
C12orf45	0.26062	0.0420408
UBAP2	0.2463	0.0217669
DCTN2	0.2253	0.0243454
GAPVD1	-0.21781	0.0488423
CUL2	-0.25436	0.0345629
ADPGK	-0.25854	0.0110621
UBE2D3	-0.264	0.0155963
USF1	-0.2644	0.0421227
PPP1R7	-0.27087	0.0339562
MTCH1	-0.27342	0.0299914
SLC7A6OS	-0.27365	0.0342752
VPS26B	-0.27396	0.035535
ZZEF1	-0.27525	0.0464996
BAG5	-0.27631	0.0162945
RTCA	-0.27754	0.00437142
RTF1	-0.28023	0.0148695
VRK3	-0.28032	0.0293573
ZDHHC20	-0.28262	0.0448239
BECN1	-0.28487	0.0189421
PSMB1	-0.28636	0.0426553
YWHAZ	-0.2868	0.00698996
TMEM14B	-0.29335	0.0135483
DDX39B	-0.29442	0.0224797
TRPC4AP	-0.29515	0.0348177
HIF1AN	-0.29669	0.0490083
TMED2	-0.29717	0.0340383
TMEM248	-0.29756	0.0168649
VAV1	-0.29761	0.014736
GIT2	-0.29859	0.00962189
PDCL	-0.30138	0.0270185
HMGXB3	-0.30143	0.0426553
SEC22B	-0.3021	0.0190464
CELF1	-0.30216	0.0373485
SART3	-0.30315	0.0336356
MMADHC	-0.30371	0.0422003
SLC25A5	-0.30508	0.0114295
TMEM170A	-0.30576	0.0229834
MAPK14	-0.30866	0.0195368
CLCC1	-0.30881	0.0137713
CSNK1G1	-0.30914	0.00438437
DHX8	-0.30966	0.0125321
RBM27	-0.31087	0.0151519
TMCO1	-0.313	0.00747932
UBE4A	-0.31334	0.026263
C6orf106	-0.31403	0.0238563
ALDH9A1	-0.3158	0.0257405
GRB2	-0.31615	0.029885
MAGT1	-0.31643	0.0491372
MED20	-0.31667	0.0389276
CWC25	-0.31843	0.0226239
TBPL1	-0.31872	0.0428722
MRFAP1	-0.31953	0.0349965
GHITM	-0.32216	0.0355197
XRN2	-0.32355	0.0172833
DPP8	-0.32381	0.00922842
FAM156A	-0.324	0.0422943
SNX1	-0.32467	0.0143104
TXLNA	-0.32784	0.0281639
NHEJ1	-0.32862	0.015342
PROSC	-0.32942	0.0219824
CASP2	-0.33073	0.0345791
PPP6C	-0.33207	0.00478989
AGPAT6	-0.33555	0.0333776
SNRNP27	-0.33672	0.0437684
ABCF1	-0.33709	0.0275327
TRIM37	-0.33839	0.0231003
C10orf137	-0.33899	0.0348177
PSMC4	-0.33976	0.0470828
FAM103A1	-0.34035	0.0139218
PRPF38A	-0.34104	0.0292381
MTF1	-0.34214	0.0164281
WBP2	-0.34348	0.0356932
PFDN1	-0.34577	0.00360464
ATP5O	-0.34616	0.0254061
SHC1	-0.34783	0.032699
PWWP2A	-0.34848	0.0360955
DAZAP2	-0.34954	0.00961938
DHTKD1	-0.35027	0.0368048
CSNK2B	-0.35056	0.00353595
CAMK2G	-0.35073	0.00291985
DAP3	-0.35102	0.0120701
IDH3B	-0.35188	0.00859659
SMYD4	-0.35207	0.0458326
UBR1	-0.35381	0.00997776
EXOSC9	-0.35544	0.024884
DAXX	-0.35762	0.00189514
TAF11	-0.35765	0.0163189
FAF2	-0.35788	0.00538442
ACTR2	-0.35828	0.0276844
VTA1	-0.35857	0.0215505
DERL2	-0.3586	0.00915439
SLC25A20	-0.35877	0.0357008
GSPT2	-0.35889	0.0339269
SYNRG	-0.35942	0.0397689
SPIN1	-0.3598	0.0452416
CLIP1	-0.36156	0.015055
MDM4	-0.36222	0.048243
CRLF3	-0.3624	0.0335661
CHMP2B	-0.36451	0.0159293
PIP5K1A	-0.36464	0.00191592
PSMB4	-0.36553	0.00364584
ATG16L1	-0.36818	0.0065738
SETD8	-0.3697	0.0102659
SPCS2	-0.37043	0.0320285
CCNA2	-0.37081	0.0178547
CLP1	-0.37112	0.00865203
H3F3B	-0.37253	0.00865226
ERLIN2	-0.37258	0.0292374
YTHDC2	-0.37512	0.0367387
DNAJC8	-0.37587	0.0193993
GSK3A	-0.37676	0.00393935
HDAC1	-0.37677	0.00213972
ATPIF1	-0.37817	0.0129132
SAR1A	-0.37827	0.00808321
PRDX3	-0.38008	0.0365176
TMED5	-0.38034	0.0193754
BTBD1	-0.38093	0.00798035
CAB39	-0.38114	0.0467541
MTRF1L	-0.38192	0.00219813
FTH1	-0.38237	0.0423554
SNIP1	-0.38387	0.0129344
CYB5R4	-0.38528	0.0065738
DLAT	-0.38856	0.0311316
RTFDC1	-0.38881	0.00221058
PRPF18	-0.38934	0.00609006
NVL	-0.38946	0.0203487
LMBRD2	-0.39132	0.00853502
COPS5	-0.39145	0.0246294
COPS3	-0.39308	0.0113841
MFAP1	-0.39407	0.0411339
CCNC	-0.39673	0.00187599
NCKAP1L	-0.39721	0.00455277
FAM32A	-0.39763	0.0188466
PGD	-0.3986	0.0129971
CDCA7	-0.3991	0.0437726
DPM1	-0.40046	0.0328839
BRD7	-0.40057	0.0360594
SPTLC1	-0.40193	0.00783996
NCK1	-0.40343	0.0385867
TTF1	-0.40458	0.0270398
EI24	-0.40477	0.0243373
GTPBP8	-0.40507	0.00964051
CTR9	-0.40523	0.0042056
PSMD12	-0.40687	0.0264576
CCDC117	-0.40776	0.00615988
SEP15	-0.4087	0.0400271
PHF20L1	-0.40904	0.0184546
ACAT2	-0.40907	0.0187301
ATP6V1H	-0.41019	0.00435708
GPKOW	-0.41068	0.030674
ANKRD28	-0.41132	0.00950882
SSH2	-0.41335	0.0389104
NUCB1	-0.41419	0.0385867
ZNF394	-0.41431	0.00297032
EIF2B2	-0.41554	0.0168649
FASTKD5	-0.41567	0.00302673
NARS	-0.41756	0.0431722
VAMP7	-0.41833	0.00873875
PSMC1	-0.41988	0.0167264
FAM117A	-0.42173	0.0215065
PTP4A2	-0.42227	0.0025656
PSMD7	-0.42415	0.0117471
NUP98	-0.42447	0.00514692
DNAJB11	-0.42548	0.0279042
C1GALT1C1	-0.42684	0.0129748
LTA4H	-0.42767	0.0492688
SS18L2	-0.42782	0.00140113
SEPHS1	-0.42815	0.0446624
DNAJB1	-0.42867	0.00537679
ANP32A	-0.42883	0.0183125
C1orf52	-0.42911	0.00797087
KRR1	-0.43178	0.0471797
RPA1	-0.43194	0.0121632
LSG1	-0.43304	0.0116593
ACTR3	-0.43738	0.0178626
PPA2	-0.43827	0.0215917
ECT2	-0.43916	0.0299711
VTI1A	-0.43974	0.00081456
RIT1	-0.44016	0.0469829
ARHGAP35	-0.44196	0.0103981
GALNT1	-0.44326	0.0367945
TCEB1	-0.44501	0.024342
SPTY2D1	-0.4462	0.0127884
HNRPLL	-0.44714	0.0290699
TDG	-0.44756	0.0187182
ARPC1A	-0.45029	0.000191101
TBC1D1	-0.45037	0.00725712
PSMB2	-0.45135	0.0125573
PSENEN	-0.45176	0.00305448
EPS15L1	-0.4525	0.000356218
ABCC1	-0.45312	0.031745
PTPN11	-0.45499	0.0133456
TMEM2	-0.45653	0.027743
PRKRIP1	-0.4583	0.0438007
SLC39A10	-0.45898	0.00413391
TALDO1	-0.4598	0.0305982
ZC3HAV1	-0.46024	0.000130641
TMEM183A	-0.46103	0.00120708
FGFR1OP	-0.46116	0.0131299
NT5C2	-0.46135	0.0236677
ZNF101	-0.46218	0.0354412
TOB1	-0.46224	0.0209892
DOCK11	-0.4648	0.00254404
ZNF609	-0.46611	0.0100063
GNG10	-0.47119	0.0484819
LUZP6	-0.4715	0.00185929
FAM126B	-0.47215	0.0447502
FBXW7	-0.47399	0.00281532
KBTBD2	-0.47453	0.0178567
SLC38A2	-0.47608	0.00737289
ARHGDIB	-0.4763	0.00349998
GMFG	-0.47814	0.00963438
CHST11	-0.47844	0.0188466
PIK3CD	-0.47874	0.00859051
PSMA4	-0.47956	0.0268317
TP53BP2	-0.47969	0.00318878
LZIC	-0.48153	0.00681511
CXorf57	-0.48188	0.0310163
RPS16P5	-0.48313	0.0377782
C6orf89	-0.48523	0.00679457
MLLT3	-0.48541	0.0220159
ZRANB2	-0.48653	0.0384333
ARPC5L	-0.48782	0.025299
STRADB	-0.48793	0.0167991
HS2ST1	-0.49245	0.0233691
SUMO1P3	-0.4962	0.0244949
RB1	-0.49634	0.0422003
CSTF2T	-0.49862	0.00130896
PRR13	-0.49882	0.000256467
ATP5F1	-0.50068	0.00134466
PIKFYVE	-0.50073	0.00521063
ASAH1	-0.50324	0.0370503
POLG	-0.50354	0.00901595
TBC1D22B	-0.50514	0.0137994
TERF1	-0.50579	0.00980687
HAT1	-0.50684	0.0467541
PAQR3	-0.50701	0.0110866
TCTEX1D2	-0.50859	0.0110829
ACSL5	-0.51134	0.0155385
MTMR12	-0.51537	0.000683704
C16orf80	-0.51594	0.00250925
HNRNPH2	-0.51758	0.0113118
ZNF131	-0.51781	0.0042056
CYTH1	-0.51864	0.0002176
HTT	-0.5187	0.0339625
PXN	-0.52033	0.00292242
FBXO33	-0.52039	0.00619648
GTDC1	-0.52139	0.0392158
SARS	-0.52248	0.0212049
C1GALT1	-0.52283	0.0140926
CDKN2AIP	-0.52311	9.73e-05
HMGCR	-0.52363	0.0210657
LYRM1	-0.52388	0.0121552
KARS	-0.52504	0.0177338
UBE2G1	-0.5272	0.00164337
YBX1	-0.52989	0.00794343
SNX5	-0.52991	0.0140768
STK17A	-0.53259	0.0125981
EID2B	-0.53437	0.00521063
MTERFD2	-0.53649	0.00533204
UBE2E1	-0.5427	0.000111667
ABHD17B	-0.546	0.00153283
MAN1A1	-0.546	0.0208566
PDE12	-0.55153	0.0154607
CRTC3	-0.55473	0.0095074
NDUFV2	-0.55547	0.0010716
ZNF544	-0.55664	0.000544873
FAM115C	-0.56257	0.039026
GRAMD1B	-0.56322	0.0229289
DGKE	-0.56406	0.0076228
ARHGAP19	-0.56463	0.00890953
SNRK	-0.56477	0.000365787
MDM1	-0.5657	0.00146495
UBE2V2	-0.56658	0.0217818
SELPLG	-0.56888	0.0371954
AKAP2	-0.56911	0.00593335
FOXN2	-0.56937	0.00886628
ACSS2	-0.57087	0.0300571
LRRC59	-0.57267	0.0190175
PRKCE	-0.57333	0.0422943
CHP1	-0.57479	0.00386589
AAGAB	-0.57728	0.0103648
LBR	-0.57957	0.00217954
SYNE2	-0.58243	0.0240377
XRCC4	-0.58634	0.00782047
SIDT1	-0.58682	0.0165378
ZNF92	-0.58767	0.00366555
GNE	-0.5894	0.00862124
SC5D	-0.59033	0.00906106
CCDC109B	-0.59042	2.9e-05
SEL1L	-0.59242	0.000349891
LDLR	-0.59353	0.0314063
INSM1	-0.59369	0.0398686
SMAP2	-0.59547	0.0210661
UTRN	-0.59704	0.00325668
NCOA2	-0.59944	0.00220358
UGP2	-0.60136	0.00971878
APITD1	-0.6044	0.0393157
BCL7A	-0.60551	0.0121847
NCOA7	-0.60863	0.0421302
C12orf76	-0.61252	0.00793303
FAM45B	-0.61405	0.0342612
HSDL1	-0.61639	0.00382549
RASA2	-0.61818	0.0017821
RAD51C	-0.61957	0.00929198
CPNE2	-0.61966	0.0228971
MARCKSL1	-0.62076	0.0206268
FLNB	-0.62766	0.00211747
AGTPBP1	-0.629	0.0154794
TTC39B	-0.63003	0.00291583
FAM65B	-0.63487	0.000150347
LYSMD4	-0.63582	0.0117471
SPG20	-0.63598	0.00697906
FAM219A	-0.63652	0.0111827
DYNLT1	-0.63674	0.00155601
CDC42SE2	-0.63898	0.000111667
CASP4	-0.64149	0.0355197
CCDC69	-0.64153	0.00210292
SAR1B	-0.64565	0.00140113
BNIP2	-0.64645	4.98e-06
TRAFD1	-0.64715	0.000102713
ARHGAP15	-0.64799	0.00210766
SH2D1A	-0.64914	0.00674193
METTL12	-0.65143	0.0432197
ERP27	-0.65717	0.0163982
MPP1	-0.65733	0.000933058
PHGDH	-0.65836	0.041564
STT3B	-0.65968	0.000933058
KLHL5	-0.66076	0.00120531
PRPF40B	-0.66187	0.000792176
MTM1	-0.66417	0.00225348
ARID5B	-0.66643	0.00642792
SSBP2	-0.66709	0.0237707
CTAGE5	-0.669	0.00506903
MDM2	-0.67688	0.00239431
COX10	-0.68669	5.27e-05
ALOX5AP	-0.68671	0.0177545
JX088243	-0.68721	0.000617113
SOS1	-0.68744	0.0371954
RELL1	-0.6891	5.63e-05
TUBA4A	-0.68918	0.0340383
UBALD2	-0.68938	0.0258142
MICB	-0.69019	0.0045097
RAP1GDS1	-0.69038	0.000120661
FLI1	-0.69046	0.000744509
SEC61A2	-0.69165	0.000336725
TPM4	-0.69257	0.00033728
PGS1	-0.69456	0.00184536
ANKRD32	-0.69994	0.039026
RPS6KA5	-0.70029	0.00519733
FGFR1	-0.70034	0.0437006
RGL1	-0.70063	0.00964444
AGK	-0.70468	0.00870687
GSR	-0.70487	0.00184147
STAMBPL1	-0.70608	0.0163325
RRBP1	-0.70734	0.0156909
EBP	-0.7132	0.000387912
FAM107B	-0.71355	0.00252589
HSP90AA1	-0.71401	0.0427022
TXN	-0.71452	0.0276479
BLZF1	-0.7162	0.00403438
IFITM2	-0.72409	0.00957483
MPZ	-0.7246	0.000768676
RFFL	-0.7279	0.000109058
IDH3A	-0.73022	0.0154512
SERINC5	-0.73778	0.000615415
SESN2	-0.73858	0.0248593
PTPN2	-0.75286	6.96e-06
GIMAP2	-0.75296	0.00136063
MBP	-0.76002	0.000904021
ZNF767	-0.76867	0.0186944
SHISA5	-0.77077	0.00697906
LY9	-0.77133	0.0205589
GSAP	-0.77179	0.0357333
TRAT1	-0.77517	0.000364933
INTS8	-0.77523	0.00260819
ADA	-0.77544	0.00483519
FHIT	-0.78075	0.00214875
WIPI1	-0.78766	0.0458066
DCP2	-0.78775	0.000641212
GALM	-0.78795	0.00720344
PASK	-0.78823	0.0102854
BPIFB4	-0.79369	0.0247661
FNIP2	-0.79995	4.55e-05
CRIM1	-0.80008	0.028014
CHD7	-0.80123	4.93e-06
PIK3R1	-0.80218	5.63e-05
PRKX	-0.80581	0.0133456
TRIB3	-0.80717	0.0368048
ICOS	-0.81259	0.00326744
DSTN	-0.81528	0.000370173
RNF144B	-0.81534	0.012216
ZNF487P	-0.81575	0.0209892
FTL	-0.81701	0.00159591
TNS4	-0.8245	0.04107
LRMP	-0.82895	0.0447837
RAB3D	-0.83154	0.00341291
AKAP7	-0.83464	0.00313662
KIF1B	-0.84125	0.00221576
CD48	-0.84509	0.00235765
TXNDC11	-0.84913	3.48e-05
PTGER4	-0.85635	0.00930306
LMO4	-0.85865	0.0150004
PLCG2	-0.86674	0.0305762
SPECC1	-0.86772	0.00112975
CCDC88C	-0.87036	0.000129473
CASP9	-0.87396	0.000157831
TGFBR3	-0.87607	0.0243454
CLIP4	-0.88	0.00141177
ARL6	-0.88062	0.0413414
MAPK6	-0.88254	0.000733372
STOM	-0.88936	0.0012749
GSTK1	-0.89163	0.000169425
GRK5	-0.89215	6.04e-05
CASP8	-0.89347	0.00210766
LY96	-0.894	0.00289636
ALS2CR12	-0.89693	0.00852611
PIK3CG	-0.89738	0.0479943
CASP10	-0.89756	6.86e-05
EXOC3	-0.90503	0.00222685
CTSG	-0.91068	0.00265323
CD5L	-0.91068	0.0339466
SYNE3	-0.91179	0.0109819
ARHGAP25	-0.91249	0.00708873
DEGS1	-0.91298	1.76e-07
CCDC85C	-0.91864	0.000127291
PGAP1	-0.92036	0.00369694
KIR3DL1	-0.92062	0.0042056
RAB19	-0.92333	0.0120701
CCNI2	-0.92853	0.037814
SLC25A4	-0.92893	0.045321
EHD4	-0.93059	0.000318516
INPP4B	-0.9365	0.00209814
ZNF75D	-0.9381	0.000538712
IQGAP2	-0.93922	0.000543319
UGCG	-0.9394	0.00259072
NPCR	-0.95338	0.00519733
LMO7	-0.95343	0.0177338
CBLB	-0.95627	0.000146236
SESN3	-0.95634	0.0247931
OSTF1	-0.95777	2.87e-05
RALGAPA2	-0.9623	2.06e-07
JAK2	-0.96379	0.0121632
TBC1D14	-0.96961	3.23e-05
SNX25	-0.97446	0.00047704
SLC37A3	-0.98016	0.00617883
MAP3K5	-0.9808	0.0333707
CASP3	-0.98756	0.00464096
TLR2	-0.99007	0.00136063
CD99	-0.99465	0.0124467
IL32	-1.00554	0.00123089
CDK5R1	-1.01147	0.00980687
MAL	-1.01214	2.37e-05
SATB1	-1.01281	1.88e-07
EVL	-1.02109	0.00330133
CD1A	-1.02768	0.000298303
GPR65	-1.02854	0.00472532
RALB	-1.03513	0.0147289
GLB1L3	-1.03591	0.0392158
SH3BP5	-1.04507	0.00179001
ANTXR2	-1.04749	0.00157351
GCLM	-1.04969	0.00485762
PPID	-1.05578	0.00207855
LEP	-1.05808	0.00776942
LIN28A	-1.05808	0.0341335
BCAT1	-1.06653	0.0276479
TRERF1	-1.07021	0.00153283
GCSAM	-1.0749	0.0252435
PLXNC1	-1.07905	8.24e-05
PPP5D1	-1.08028	0.00376622
PCCA	-1.09593	0.000140932
CLDN10	-1.10256	0.0177183
FCRLA	-1.11068	0.00481274
C12orf74	-1.11068	0.0372388
NR5A1	-1.11068	0.0435467
ST8SIA4	-1.11367	1.59e-06
QSOX2	-1.12688	2.3e-06
PIM2	-1.13617	0.0184926
CLMN	-1.13625	0.0102987
ADC	-1.14258	0.0340383
POU1F1	-1.14467	0.000465686
ZIC5	-1.17507	0.0316477
SLC25A2	-1.17507	0.0342612
MINA	-1.17629	0.00245646
TMEM65	-1.17854	0.000700981
NACAP1	-1.19346	0.0411433
USP6NL	-1.1943	3.92e-08
LIMS3	-1.19673	0.0242106
MCOLN2	-1.19811	0.00786648
PTPRO	-1.20229	0.0208887
ZC3H4	-1.21159	0.000190513
TC2N	-1.21962	0.00034207
RIMS4	-1.22768	0.0397403
AOC4	-1.23191	0.00741208
FAM27E3	-1.23271	0.00357069
SYNM	-1.23502	0.00272653
LPAR6	-1.24576	3.68e-05
EXOC3L1	-1.25063	0.0413414
MX2	-1.25094	0.00267801
ACSL6	-1.25218	0.0268308
SNX29	-1.2697	2.54e-05
STAP1	-1.27109	0.000399344
SAMHD1	-1.27295	0.00165249
BCL2A1	-1.27953	0.00151194
NTPCR	-1.2797	0.00589341
PLA2G2D	-1.28848	0.0299384
MCTP2	-1.28925	0.0166287
IFITM1	-1.294	9.64e-05
ARHGEF11	-1.29561	0.00480492
VIPR2	-1.30201	0.0352294
ATCAY	-1.30614	0.0381536
C6orf123	-1.31068	0.0235164
ELOVL6	-1.31616	0.00159821
DOK3	-1.32133	0.0176829
RNF213	-1.3245	0.00134473
SNCA	-1.33495	0.0143434
PIK3AP1	-1.34745	0.000572249
AXIN2	-1.3625	0.00196296
CLEC2B	-1.3661	0.0138676
KLF3	-1.37382	2.63e-07
NINJ2	-1.37428	0.024342
BRDT	-1.37507	6.83e-06
NLRC4	-1.37507	0.0142174
ESM1	-1.37507	0.0339466
RARRES3	-1.37617	0.000495851
CXCL3	-1.40906	0.0333706
[truncated: 155 more rows]

## Sheet: Table S2
Table S2. List of 2602 genes regulated by CBP/p300 bromodomain during human Treg differentiation (P adjusted value <0.05). Data from 5 donors. See heatmap in Supplementary Fig. 1C.
Gene	log2FC	AdjPvalue
CST7	-6.94548	7.3081e-12
HLA-DRA	-5.44629	3.18802e-09
ALPK2	-5.33903	0.000154753
NKD2	-5.08406	1.41382e-06
HLA-DQA1	-5.02229	3.98202e-07
ENTPD1	-5.01133	2.04132e-07
Ig_kappa	-4.72843	0.000300726
GPR15	-4.63006	1.80929e-07
CABLES1	-4.50223	9.7306e-08
CCR8	-4.44853	0.0163023
SLC28A3	-4.33178	4.34316e-05
IL23R	-4.19273	0.00132689
CD86	-4.09391	0.0030895
SGIP1	-4.05551	0.00170832
CNR2	-3.96365	0.0251749
SMPD3	-3.89455	0.00516949
SLC23A1	-3.89072	0.000195385
KLF2	-3.85466	0.000433126
MZB1	-3.84902	5.35721e-06
MYCL1	-3.8128	0.000149016
CYP26A1	-3.80959	0.00277863
KCNJ12	-3.69839	0.000725505
CAMK2N1	-3.69336	0.000158337
BIRC7	-3.67807	0.000824167
CD24	-3.63319	5.49511e-06
C17orf104	-3.61343	1.67012e-05
PLCH1	-3.61145	0.00258648
XCL2	-3.58877	0.00589599
C5AR2	-3.56687	0.001232
RBFOX3	-3.56687	0.0048345
BAHCC1	-3.44964	0.00260779
NR5A2	-3.4462	7.19399e-05
HLA-DRB1	-3.44439	7.9692e-05
SLC29A4	-3.41549	1.81935e-05
CA8	-3.41438	3.15328e-06
NPTX1	-3.40518	8.65408e-07
YBX2	-3.39866	7.12365e-05
ATP8B4	-3.38894	0.00018081
ITGA11	-3.38514	0.000215176
TUSC5	-3.35936	0.00168404
SEC14L5	-3.35936	0.0197772
RGS18	-3.34314	0.00151812
NLRP6	-3.34212	0.000404318
NOG	-3.31443	0.000220214
MYO7B	-3.29416	0.0113461
ACSBG1	-3.27889	0.00376685
UMODL1	-3.22784	0.00931042
B3GNT7	-3.22784	0.013762
GTSF1L	-3.21327	0.0123381
AMZ1	-3.19839	0.00022896
RAET1E	-3.19839	0.00041418
FGF9	-3.17807	6.06274e-06
F12	-3.17463	0.00075358
CIITA	-3.15235	8.4718e-05
RGS9BP	-3.14862	0.00289729
SECTM1	-3.14549	0.000113248
SLIT3	-3.14528	0.00239301
RAB37	-3.13196	1.57716e-05
S1PR3	-3.12702	0.000854325
DRAXIN	-3.12646	0.0361997
TRPM2	-3.1175	0.0110305
SLAMF7	-3.10773	2.51538e-09
SLC6A15	-3.10283	0.0152238
ILDR1	-3.10207	0.00212941
ABCA1	-3.09517	0.0137514
ST8SIA1	-3.08841	0.00196761
CCR2	-3.06853	0.0224106
WFDC5	-3.06687	0.00657254
FUT7	-3.05023	0.00638188
DGAT2	-3.04655	1.77241e-07
DMBX1	-3.02564	0.00041418
RGL4	-3.02122	7.74404e-06
ZNF80	-3.01412	8.65408e-07
MT1L	-2.99275	9.92628e-05
DNAJC5B	-2.99087	0.0184153
PIK3R6	-2.95512	0.000933911
LRRC25	-2.94964	0.0135314
JPH2	-2.94681	0.0139534
TPSB2	-2.9342	0.020468
CCL25	-2.90674	8.30961e-06
CXCR2	-2.90591	0.00402607
IGLL1	-2.90591	0.0441732
BOK	-2.87387	0.00936164
GPR124	-2.87259	1.02351e-05
NMUR1	-2.85936	0.00173209
WNT10B	-2.85936	0.00247363
CAPSL	-2.85936	0.00652776
C2orf78	-2.85936	0.0153216
FAT1	-2.85256	0.0198764
FFAR3	-2.85245	0.0174725
MGC12916	-2.84667	8.77586e-06
CDHR1	-2.84417	0.00404661
GPR82	-2.84314	0.0220127
JPH3	-2.83903	0.00264585
NCR3	-2.81581	1.08184e-06
MGLL	-2.80959	0.000435267
HLA-DQB1	-2.80388	6.54526e-08
KRT86	-2.79936	0.000278559
PTPN3	-2.79669	0.000556779
C20orf195	-2.79659	0.0267795
FBXW10	-2.77874	0.0137712
LRP2	-2.76632	0.000415482
IL7R	-2.76477	0.000381589
CXCR7	-2.76429	2.7271e-06
HDC	-2.74682	0.0102114
NOXO1	-2.74094	0.0204587
PANX2	-2.73739	0.000318512
SNED1	-2.73739	0.0222267
WASF3	-2.73359	0.00655279
EPHA3	-2.72668	0.0317342
KCNH2	-2.72608	0.000296896
MGAT5B	-2.72094	0.0204063
CREB3L3	-2.71819	0.00312752
LGALS9C	-2.71698	0.0194977
JAG1	-2.70987	0.000469313
ISM1	-2.70636	0.0311456
XCL1	-2.70418	0.0227539
DMGDH	-2.69839	0.032377
FGFBP2	-2.69501	0.00120305
CLDN5	-2.67807	0.00609389
LHX1	-2.67117	0.0177343
SLC9A2	-2.6632	0.00844634
HLA-DRB6	-2.66118	0.0490669
CD7	-2.64909	1.84684e-09
MGAT3	-2.64107	0.00229563
FAM46C	-2.63963	3.18802e-09
OR56B1	-2.6392	0.00191542
FLT1	-2.63861	0.000167336
FCER2	-2.63563	0.00685764
ADORA2A	-2.62695	0.000493496
ZACN	-2.62646	0.0054706
BFSP2	-2.62646	0.00576118
ASS1	-2.61978	0.00721051
CD160	-2.61343	0.00889708
MYO18B	-2.61131	0.0340673
ZNF541	-2.61092	0.0394015
CRYAB	-2.60207	0.0452722
MYOF	-2.577	0.0177343
CCDC42B	-2.56937	0.0494533
LHX5	-2.56687	0.00186621
PGLYRP3	-2.56687	0.00212941
SOX18	-2.56687	0.00294602
PAX6	-2.56687	0.00476744
UNC5C	-2.56687	0.015207
ECEL1	-2.55962	0.0395109
GAS7	-2.55955	0.0152794
ZBTB32	-2.55176	0.00139828
C9orf139	-2.54632	0.0235296
ICAM5	-2.54492	8.52219e-06
FAM160A1	-2.52149	0.00279203
EPR-1	-2.51711	0.0267795
ADRA2C	-2.51711	0.0288565
HPGDS	-2.50527	0.00669946
FAM26F	-2.48585	0.000744366
PDE4A	-2.48562	0.000202398
C11orf96	-2.46365	0.0142721
FAM81A	-2.45053	0.0026862
JN120857	-2.43536	0.0147014
TIMP2	-2.43403	3.25227e-05
TJP1	-2.42811	0.00232796
PNMA6C	-2.42239	0.0477533
GSG1L	-2.40591	0.00517905
JSRP1	-2.40591	0.0245102
DIO2	-2.40591	0.0258147
LRRC10B	-2.40591	0.0408697
AFAP1L1	-2.3952	0.00161397
RYR1	-2.38964	3.58141e-06
EPAS1	-2.38587	0.00542035
KCNA6	-2.382	0.000575121
ASB2	-2.37746	1.2328e-05
DTNA	-2.36658	0.0128158
EPB41L4B	-2.3624	0.00682223
SH2D5	-2.35936	0.0105349
HS3ST3B1	-2.3525	0.00175115
FXYD2	-2.35203	0.00419301
ADAMTS4	-2.35126	0.000201641
OSBP2	-2.35039	0.0189258
ADRA2B	-2.34507	0.0178822
TEX19	-2.34314	0.00783316
CPAMD8	-2.34314	0.0488272
SDCBP2	-2.32561	0.000870183
MT3	-2.32009	0.000837846
ZAN	-2.30959	0.0481339
SNCB	-2.29471	0.0236922
LAG3	-2.29391	1.36435e-06
PTPN14	-2.28416	1.12285e-05
PDLIM1	-2.27986	0.000643462
FGF14	-2.27439	0.00399474
TTC34	-2.27439	0.00832527
MAFA	-2.27439	0.0269041
COL9A3	-2.27439	0.0479522
FXYD1	-2.27439	0.0496559
KCNA3	-2.25401	4.57707e-06
CXCR3	-2.24789	0.00651473
UBASH3B	-2.2429	1.57716e-05
GNA15	-2.23848	7.62203e-06
LAIR2	-2.23237	0.0152932
CPNE7	-2.2308	0.000384156
GZMK	-2.22204	0.00320551
BATF3	-2.21911	0.012947
RASGRP4	-2.21377	0.000714864
HECW2	-2.20645	0.00454272
SIGLEC9	-2.19839	0.0182165
KLF15	-2.19839	0.0193717
GAPT	-2.19839	0.0195489
RAX	-2.19839	0.0278154
MNX1	-2.19839	0.0378244
BMP7	-2.19839	0.0494322
CXorf21	-2.19571	3.18802e-09
CILP2	-2.1895	0.0181369
RASGRP2	-2.18669	0.000259552
KLRB1	-2.17807	0.0476418
ZBTB16	-2.17466	0.000971664
MYO1F	-2.17354	0.000870183
METRNL	-2.16215	0.0155044
MTL5	-2.15924	2.70482e-06
REG4	-2.1422	0.000493496
DDC	-2.1283	0.0236423
NETO2	-2.12524	0.00264585
GALNT3	-2.12468	4.88105e-05
HIC1	-2.12335	0.000178789
TANC2	-2.12303	4.62768e-06
TIGIT	-2.11817	0.000352034
IGFLR1	-2.11455	2.89968e-07
TBX1	-2.11343	0.000934864
RAB3IL1	-2.11343	0.00207229
HORMAD2	-2.11343	0.024489
CTHRC1	-2.11343	0.031893
GATM	-2.10983	0.000599966
PITX2	-2.10207	0.0292491
TNFSF9	-2.06927	0.016991
CACNA1H	-2.06775	0.0011793
ASXL3	-2.06687	3.25227e-05
MVB12B	-2.06687	0.000355714
TNFRSF13B	-2.06687	0.000399603
SASH1	-2.06687	0.0112748
CPA3	-2.06687	0.0135543
FOXD2	-2.06687	0.0143273
PCDH1	-2.06687	0.0191299
ZSCAN10	-2.06687	0.0449233
FOXD1	-2.06434	0.00985251
KIT	-2.0536	0.0484614
XPNPEP2	-2.05066	8.52219e-06
ATP1A4	-2.05066	0.0475316
LZTS1	-2.04911	0.00103608
JAKMIP1	-2.04888	0.000560065
CMAHP	-2.04082	2.69657e-08
CGREF1	-2.03492	0.018784
GALR2	-2.02032	0.0129849
TTLL9	-2.01711	0.0167642
CECR3	-2.01711	0.045073
WDR49	-2.01711	0.0487065
DUSP9	-2.00575	0.0274974
SMAD9	-2.00411	0.00939031
RFX8	-1.9995	0.0207623
SCIN	-1.99087	0.0255191
WNT1	-1.98191	0.0408344
GPR174	-1.97961	4.77968e-07
ICOSLG	-1.97527	0.000195385
LGALS17A	-1.97466	0.00574394
FAM172BP	-1.9723	0.00368907
C12orf39	-1.96365	0.0147014
HES4	-1.96365	0.0342089
LAMA2	-1.95752	0.0288842
TP53INP1	-1.95167	0.00137449
FGFR1	-1.94501	3.10919e-06
RNF222	-1.94491	0.041945
PNMA5	-1.93536	0.0452722
RNF165	-1.93452	0.0114847
TERT	-1.93193	0.0190263
GPRC5C	-1.93122	0.0312298
NCALD	-1.92547	0.0123828
GLT1D1	-1.92524	0.00476744
SELL	-1.92371	0.000958309
RAMP1	-1.92078	0.0328365
B4GALNT4	-1.91713	0.00596946
TOX2	-1.91623	0.00103245
OR1F2P	-1.91445	0.0469039
SLCO4A1	-1.91183	0.0001158
ITPKA	-1.91151	7.08351e-05
CNNM1	-1.90702	0.0156858
LHX2	-1.90591	0.00467746
COL16A1	-1.90591	0.0101858
FCER1A	-1.90591	0.0271634
LHX6	-1.90591	0.0320629
LHX4	-1.90591	0.0432167
AJAP1	-1.90591	0.0439013
ITGB4	-1.90256	0.000971664
SLC16A9	-1.90241	0.0165877
ARHGAP39	-1.89267	0.0160513
TSC22D3	-1.88616	0.00416793
C3	-1.88559	0.0478568
FCGR1A	-1.8833	0.0364724
MATN4	-1.88238	0.0394015
BTBD11	-1.86947	1.28149e-06
ZC3H12D	-1.86233	0.000837846
ECSCR	-1.85936	0.0235296
HS3ST3A1	-1.85539	0.0396462
SLC9A3R2	-1.85356	0.0249439
CASKIN1	-1.848	0.00243985
ELFN2	-1.84127	0.0167607
KLHL31	-1.83788	0.0441347
CCDC144CP	-1.83476	0.000762129
GALNT18	-1.83448	0.000870183
PLXND1	-1.8194	0.00075358
AIM2	-1.81416	0.00495724
MT1M	-1.8137	0.0408465
MT2A	-1.8126	6.3e-05
PIWIL2	-1.80959	0.0465144
CPA5	-1.7915	0.0139888
NPCR	-1.78492	0.000618821
ARHGEF10	-1.77735	0.000105193
IL9R	-1.77459	0.0341709
NXNL2	-1.77439	0.00611451
CPZ	-1.77439	0.00993695
BHLHE22	-1.77439	0.0179196
CRYAA	-1.77439	0.0361689
NRTN	-1.77136	0.0105271
IRAK3	-1.76425	1.25118e-05
QSOX2	-1.75665	5.25487e-10
PNPLA3	-1.74308	0.00650308
PHEX	-1.73991	0.00176056
ANKRD36BP2	-1.72968	6.06274e-06
MYB	-1.72925	0.000826239
WNT10A	-1.72849	0.0057743
SYTL3	-1.72821	8.7799e-06
NTNG2	-1.72571	0.0137514
Nup88	-1.72463	0.00399474
TMED6	-1.72094	0.0340524
IL32	-1.71555	4.5593e-06
SH2B2	-1.71425	0.0203973
ZBTB46	-1.71327	0.00550779
EFCAB4A	-1.71191	0.000580859
EGOT	-1.71163	0.0165477
STC1	-1.70172	0.0375821
RAB20	-1.70151	0.00186621
FES	-1.70066	0.00675638
C6orf223	-1.69851	4.57707e-06
SOX1	-1.69839	0.00333933
CCDC36	-1.69839	0.00503959
TRPC5OS	-1.69839	0.0230805
C1orf127	-1.69839	0.0340768
ATP8B3	-1.6981	8.52219e-06
KRT7	-1.6925	0.0489586
DEPTOR	-1.68685	0.032808
RHOB	-1.68623	0.031714
SLC27A2	-1.6784	9.87397e-05
KBTBD11	-1.67745	0.0123217
SEC11C	-1.66855	1.77241e-07
HHEX	-1.6673	0.00541453
HLA-DOA	-1.66583	0.0148485
FSCN1	-1.66362	0.000470541
DPYSL4	-1.6611	0.00087083
METRN	-1.65292	0.0136052
HELZ2	-1.6525	0.0242489
MYRF	-1.6504	0.0165477
SRGAP3	-1.64907	0.0184158
SPINK2	-1.63905	0.0287739
C2orf72	-1.62304	0.0012273
CD74	-1.61871	3.71978e-09
KCTD15	-1.61792	0.0241595
NKX6-1	-1.61343	0.000119534
ONECUT1	-1.61343	0.000779942
C17orf99	-1.61343	0.00168404
AK5	-1.61343	0.00288801
TEKT3	-1.61343	0.0198764
GLP1R	-1.61343	0.0395276
PRODH	-1.61343	0.0459201
MASP2	-1.61343	0.0463695
TMEM89	-1.61343	0.0491139
SIM2	-1.61343	0.0497695
ITGAX	-1.61336	0.0201462
BID	-1.61326	0.0108819
CTSW	-1.60755	0.000141464
NTRK1	-1.59724	0.00991331
ULBP1	-1.59698	0.0486364
ACP5	-1.59643	1.65672e-08
MAPK12	-1.59267	0.000854715
SLC7A11	-1.5872	0.0142988
HAGHL	-1.58588	0.00574735
PVRL2	-1.58273	0.032377
RCN3	-1.58078	0.00945163
RASAL1	-1.57562	0.012284
SHISA3	-1.56865	0.0317023
CHRNA6	-1.56778	0.0022578
EVI2A	-1.5675	0.000101288
C20orf201	-1.56687	0.0162376
DCLK3	-1.56687	0.0327969
EPSTI1	-1.56678	0.0157524
POU2AF1	-1.5601	0.000195385
SERPINE2	-1.5588	1.77241e-07
PDGFA	-1.55468	0.00586234
GCSAM	-1.55134	0.00160297
GAD1	-1.55025	0.0218391
RGS1	-1.54802	0.0138217
CCDC110	-1.5352	0.0359951
GPR183	-1.53247	0.00297917
MEX3B	-1.52399	0.0161865
IL12RB2	-1.52395	0.00907026
JAG2	-1.52151	0.0279989
RAB3A	-1.51136	0.00272309
SOX4	-1.5097	0.00255926
PIM2	-1.50422	0.000516007
BIRC3	-1.50337	2.60623e-05
RGS14	-1.49564	0.00241579
SPON1	-1.49547	0.0191354
PER1	-1.49082	0.0252594
GJC2	-1.48864	0.0353217
DFNB31	-1.4823	0.0198776
CDKN1C	-1.47836	0.0172311
MYO5C	-1.4757	0.00176056
PLIN2	-1.46746	0.000907444
MYO1B	-1.46397	1.15714e-08
ASIC1	-1.46217	0.00100357
TPRG1	-1.45971	0.00955211
CD84	-1.45937	0.000564719
RASSF8	-1.45683	0.00178615
DUSP5P1	-1.45294	0.000195385
GPR55	-1.44412	0.000581021
MARCH3	-1.42936	0.000109043
AMICA1	-1.42633	0.00169679
CD27	-1.41665	0.000597127
U2AF1L4	-1.41311	1.57716e-05
FAM117A	-1.41307	1.9024e-05
DHRS3	-1.41112	9.77049e-07
P2RY8	-1.41002	0.000278559
KIF12	-1.40591	2.97583e-05
MLPH	-1.40591	0.000198049
ISL1	-1.40591	0.00136217
PCDH17	-1.40591	0.00272378
MDFI	-1.40591	0.00843966
ADCY5	-1.40591	0.0165477
BTBD18	-1.40591	0.0221299
TRNA_Gly	-1.40591	0.030483
KLK11	-1.40591	0.0431008
CXorf40A	-1.40194	1.27552e-06
AV1S4A1N1T	-1.39912	5.62731e-06
ZMYND10	-1.3975	0.00701131
HPGD	-1.39072	0.00123395
SPON2	-1.38863	0.0277105
MYO1A	-1.3877	0.0171781
SPNS3	-1.38723	0.0105349
LST1	-1.38205	0.00285558
ACSM3	-1.38166	1.16647e-07
IL1R2	-1.37954	0.025488
AV25S1	-1.37218	0.000387134
FOSL2	-1.37208	8.22605e-05
BSPRY	-1.37098	1.60077e-05
PITPNM2	-1.36403	0.00813683
JHDM1D	-1.36063	0.00672161
MMP25	-1.36004	0.0443534
AIM1	-1.35101	8.65408e-07
RNF125	-1.3495	0.000137609
CASS4	-1.34933	0.0232942
ST8SIA4	-1.3403	0.000422816
OTUD1	-1.34025	0.00102891
NKG7	-1.32798	0.0431673
ADAMTS7	-1.32767	0.0303929
CACNA2D2	-1.31951	0.0137588
ADRBK2	-1.3194	1.77241e-07
C5orf56	-1.3172	0.000477129
SLC25A53	-1.31519	0.00319988
MYO1E	-1.31265	0.00994763
BNIP3	-1.30913	0.00517905
VLDLR	-1.30792	0.0125471
GPR146	-1.30743	0.046028
TTC22	-1.30714	0.0217925
RGPD1	-1.30644	0.0113461
NOD2	-1.29882	0.0163023
MAL	-1.29719	0.00337774
TCEA3	-1.29233	0.00611916
HSD17B14	-1.29221	0.0139534
TIFA	-1.29179	5.55329e-05
GPR65	-1.29136	0.00621815
SLC1A4	-1.29036	7.08351e-05
RAB43	-1.2888	0.00782809
GK	-1.28479	2.28194e-07
ECE2	-1.28444	0.000834913
LRRC33	-1.28296	0.000278559
ADAM8	-1.28207	9.78816e-05
SYPL1	-1.28186	0.000480455
NEURL1B	-1.27527	0.0397765
SAMD10	-1.27509	0.0221524
RNF208	-1.27439	0.0382943
COL26A1	-1.27439	0.0498411
PLCG2	-1.27346	0.000198049
MAP3K14	-1.27276	4.58172e-07
PDE6G	-1.2722	0.0265299
NT5M	-1.27052	8.86023e-07
P2RY10	-1.26507	3.9863e-07
APOBEC3H	-1.25998	0.00173063
INPP5A	-1.25902	1.65609e-06
NUDT8	-1.25618	0.000569363
CBS	-1.25502	0.00214077
DUSP16	-1.25078	4.45064e-05
EVI2B	-1.2501	0.00606303
GBP5	-1.24915	0.00173094
XKRX	-1.24885	0.0410454
FGD6	-1.24738	0.00188596
SPTBN4	-1.24303	0.0138049
RAB33A	-1.23656	0.000107839
TNFRSF18	-1.23629	0.0426191
IKZF2	-1.23519	0.0279228
IL4I1	-1.23519	0.0454642
NUDT14	-1.22688	0.000775908
LSP1	-1.22576	0.00791978
CD68	-1.22549	0.0304839
FOXJ1	-1.2237	0.0469039
FRMD4B	-1.22226	0.0105593
RAB11FIP5	-1.22147	0.0116174
JDP2	-1.22129	0.0439056
ACTG1P4	-1.22033	0.0331825
DLL1	-1.21738	0.0483644
ZBED2	-1.21734	0.0449376
SURF4	-1.2172	5.25487e-10
TMEM64	-1.21478	3.41245e-05
CSGALNACT2	-1.21477	1.41382e-06
TRIM16	-1.21391	0.0302417
DERL3	-1.2116	0.013054
KLHL32	-1.21118	0.036206
MTO1	-1.21099	1.1419e-05
ARG2	-1.21076	0.000807438
SDCBP	-1.20469	0.000234888
CKB	-1.20467	0.0171001
SAT1	-1.20397	0.00291656
EVL	-1.19666	0.0017412
FLT4	-1.19552	0.0349661
CHST2	-1.19528	0.00339904
ATHL1	-1.19145	0.00084955
CD28	-1.18887	0.0011301
ADA	-1.18803	5.35067e-07
ANKRD55	-1.18517	0.000428928
PIK3R5	-1.18129	2.48487e-05
LIPE	-1.17993	2.46482e-05
HCG27	-1.17871	0.00189189
GPR19	-1.17507	1.50281e-06
BNIPL	-1.16735	0.0239029
AHCYL2	-1.16457	0.0274256
GEM	-1.16168	0.0390923
BBC3	-1.16036	0.0419229
S1PR1	-1.15544	0.00167146
PXK	-1.15387	1.20015e-05
IL16	-1.14961	0.00598058
EDA2R	-1.14912	0.0284125
ARAP3	-1.1472	0.0167008
STC2	-1.14304	0.012765
STAM	-1.1405	3.11634e-07
PREX1	-1.14	0.000586193
MYLIP	-1.13806	0.00815915
RASA3	-1.13748	0.00116973
GPR18	-1.137	0.0489586
STK32C	-1.13667	0.000294841
SPECC1	-1.13597	1.36435e-06
SESN3	-1.13578	0.00599859
ADCK3	-1.13414	0.000156425
LGALS9	-1.13399	0.0253833
PLAU	-1.13195	0.0456985
SEPT3	-1.13186	0.0066342
CDCA7	-1.13086	0.00279203
LOXL1	-1.12667	0.015689
TNFRSF1B	-1.12531	0.00447357
CD226	-1.12421	0.0086678
MCTP2	-1.12413	0.00013488
GKAP1	-1.11842	0.00951545
LAT	-1.1173	7.91815e-05
GSTA4	-1.1162	0.000779942
CXCL16	-1.11593	0.0478568
TIAM1	-1.1146	3.11365e-05
ZFP57	-1.11343	0.00390842
SPDYC	-1.11343	0.00693594
TUBA3C	-1.11343	0.00917523
DNAJC5G	-1.11343	0.018159
ADAM33	-1.11343	0.0238582
OR4F15	-1.11343	0.0309077
HYAL4	-1.11343	0.038171
ADCYAP1	-1.11343	0.0402487
KRT19	-1.11343	0.0421328
PCBP3	-1.1032	0.0484148
MTSS1	-1.10306	0.0397039
MDS2	-1.10231	0.00975452
LYSMD2	-1.10192	1.24621e-05
DEPDC7	-1.10114	0.00166894
LRP11	-1.09553	0.00018081
CT45A2	-1.09517	0.0126259
NUCB2	-1.09408	2.83936e-08
LRFN1	-1.09369	0.00980269
JMY	-1.09224	0.00747485
RHEBL1	-1.08997	0.00148282
GLA	-1.08917	0.00815915
GK3P	-1.08613	0.00377212
FHIT	-1.08608	0.0166804
PMS2L14	-1.08456	0.00539691
TTC32	-1.08282	0.0166975
ARID5B	-1.07719	0.00187363
RAC3	-1.07673	0.00137082
SLC15A4	-1.07585	0.000584168
IFITM3	-1.07522	0.0353089
GPRIN3	-1.07516	0.00186621
HCG4	-1.0722	0.0241715
ARHGAP9	-1.07099	4.81084e-06
GZMM	-1.07068	0.00892315
HAVCR2	-1.06819	0.00653225
X58749	-1.06726	0.0262625
SLC17A9	-1.06342	0.00250672
HDAC4	-1.06042	0.0203246
NOS3	-1.06022	0.00112603
WHAMM	-1.05579	0.00990541
RTN4IP1	-1.0527	0.00015427
ITGAM	-1.05226	0.0350548
TRIO	-1.05178	0.0015676
C2CD2	-1.04819	0.000556265
HLA-DPA1	-1.04744	0.0243015
N4BP3	-1.04668	0.0280168
RORA	-1.04594	0.00544159
ISG20	-1.04456	0.00679805
AKAP2	-1.04396	0.00124908
LAX1	-1.0424	0.000355714
KCNQ1	-1.04199	7.43125e-07
P2RX5	-1.04126	0.00836269
BATF	-1.04042	0.000870183
RFK	-1.03897	0.010713
MAGEH1	-1.03872	3.32739e-06
ERP27	-1.03728	0.0101118
TMEM120A	-1.03666	0.0394443
NUDT11	-1.03533	0.0182391
MYO6	-1.03505	0.0209644
PRKAR1B	-1.03246	0.000670636
PYHIN1	-1.03228	0.0402691
SCARNA21	-1.0318	0.00766299
CXorf40B	-1.02848	1.24621e-05
TNNC1	-1.02695	0.0314612
DNAJB9	-1.02636	0.045823
OSBPL6	-1.02161	0.0340768
RAB11FIP4	-1.01955	0.000195385
SCARNA6	-1.0194	0.00738589
MAP3K15	-1.01302	0.00830767
C12orf75	-1.01023	0.000366871
HLA-DMA	-1.00856	0.000693468
STX1A	-1.00728	0.0115744
ASPRV1	-1.0049	0.0136054
TIGD3	-1.0028	0.0393733
PELI2	-1.00244	0.0132356
PDE4DIP	-1.00181	0.000241434
GYPC	-1.00047	2.40492e-06
TMC8	-1.00022	1.27171e-07
SEC31B	-0.99626	0.0158802
PMS2P5	-0.99544	0.00012668
ARL5B	-0.99431	0.0325603
SYNGR3	-0.99394	0.0279977
ZFP36	-0.99202	0.0191299
TRABD	-0.99096	0.000998778
UBASH3A	-0.99058	0.037443
ARL4C	-0.99039	0.00176737
NACC2	-0.98886	0.00164391
CCDC141	-0.98858	0.0484148
IL1RAP	-0.98785	0.0192956
SNX16	-0.98769	0.00173184
C1orf21	-0.98767	0.000241434
GMFG	-0.98752	1.2328e-05
E2F1	-0.98735	0.00230515
NEURL	-0.98657	0.0354839
XYLT1	-0.98333	0.0152238
TUBA4A	-0.98313	0.000383462
LAYN	-0.98245	0.0207623
INPP5D	-0.98214	0.00103245
ARPP21	-0.98191	0.00352633
ASB9	-0.97973	0.00289729
DBP	-0.97649	0.0196757
PIM1	-0.97295	0.0163588
DBN1	-0.96995	0.00148407
DENND6B	-0.9697	0.0165615
FKBP11	-0.96932	7.19547e-05
CD48	-0.96542	0.000348008
C2orf48	-0.96535	0.000584168
TMSB4X	-0.96448	0.000185109
LAT2	-0.9641	0.000388177
WIPF1	-0.96165	0.000971664
CORO2A	-0.96095	0.000834913
CDT1	-0.96014	0.000120195
CMIP	-0.9576	0.0173062
TBX21	-0.95669	0.0334829
GLCCI1	-0.95652	0.00874265
PTAR1	-0.95586	0.00173184
RNF44	-0.95562	3.11817e-06
CCDC19	-0.95477	0.040555
GALM	-0.95154	0.00220026
STAC3	-0.94806	0.0267846
DCK	-0.94805	0.0027605
SLC12A7	-0.94763	0.00247219
FAS	-0.94621	4.97621e-06
TNIK	-0.94552	2.25827e-05
NARF	-0.94292	9.69857e-06
SLC43A1	-0.94086	0.0101253
TMEM38B	-0.94013	0.00599859
SIGIRR	-0.93806	0.00951545
TMEM2	-0.93629	7.12365e-05
IRF2BP2	-0.93617	0.000160707
ANXA2R	-0.93165	0.0342218
PRKCH	-0.93159	2.20702e-06
PGM2L1	-0.93052	0.000330274
CEBPB	-0.93051	0.0276256
SPRY1	-0.93026	0.00717173
AOC2	-0.93001	0.0392955
FTL	-0.92947	0.00828876
PLCXD2	-0.92718	0.010023
ZNF724P	-0.92401	0.00443365
LONRF3	-0.92374	0.0478568
ERO1L	-0.92315	0.0123934
SMAP2	-0.92225	0.000426676
NHLRC4	-0.92075	0.00684211
INSIG1	-0.91905	0.00391874
FAM162A	-0.91564	0.00183969
NGLY1	-0.91439	7.19399e-05
VPS8	-0.91331	0.00564113
MYO1G	-0.9114	6.27546e-05
BAIAP2	-0.90625	0.0141067
CES5A	-0.90591	0.000286554
BTNL3	-0.90591	0.000434689
SUPT20HL2	-0.90591	0.000974492
GNRHR	-0.90591	0.00904903
SPZ1	-0.90591	0.0118779
AKNAD1	-0.90591	0.0212537
C10orf107	-0.90591	0.0254806
POU3F3	-0.90591	0.0426559
DOK2	-0.90343	0.00274249
S100A4	-0.90323	0.0192019
AIF1	-0.90279	0.00270406
DNAJB4	-0.901	0.0372447
SLA	-0.89816	0.00823381
RCAN3AS	-0.89773	0.0342218
SCARNA22	-0.89731	0.0360781
ZBTB41	-0.89272	0.0111355
LRP5L	-0.89219	0.00480878
TMTC2	-0.89217	0.0154291
RRAGD	-0.88905	0.00191981
MTHFD2	-0.88556	0.0227539
SEPT9	-0.88476	0.00136217
PODXL	-0.88323	0.0162156
SNX10	-0.88191	0.038494
SCARNA9L	-0.88111	0.000181362
ANKEF1	-0.87985	0.0115854
GOLT1B	-0.87847	0.0173825
ARHGDIB	-0.87497	0.000854643
PBXIP1	-0.87255	0.0459201
SRXN1	-0.87219	0.00850265
DPP4	-0.87141	0.0235973
LMCD1	-0.87073	0.0100054
PVRIG	-0.87058	0.00823381
HDAC7	-0.86795	7.7466e-05
SFI1	-0.86702	0.000591884
SNX20	-0.86597	0.0015146
RGS12	-0.86459	0.00077264
CDKN1B	-0.8643	0.00143424
YPEL1	-0.86384	0.0252965
PHLPP1	-0.86121	0.0121973
ZNF850	-0.86033	0.00472066
P4HA2	-0.86015	0.0047575
EFNA4	-0.86013	0.0118332
EAF2	-0.8598	0.0053132
SEC24A	-0.85887	0.00181178
LCK	-0.85883	5.1094e-05
ZNF341	-0.85762	0.00395987
CD8B	-0.85679	0.0173797
CBX7	-0.85663	0.000456225
NMNAT3	-0.85655	0.0194726
CD79B	-0.85642	2.74296e-05
FCHSD2	-0.85636	3.0721e-05
BCL3	-0.85619	0.0496291
FLI1	-0.85552	0.00044689
FAM159A	-0.85513	0.0419229
S1PR4	-0.85389	0.0372439
AP3S1	-0.85177	0.00404278
GAS2L3	-0.8513	0.011175
PMS2L2	-0.84733	0.000608122
SLC39A8	-0.8473	0.00125537
ST3GAL5	-0.84513	0.0280611
POLR3D	-0.84458	0.00220293
PTPRVP	-0.84276	0.0293656
ISYNA1	-0.84204	0.00188741
KLHL28	-0.84144	0.0217025
SYCP2	-0.8414	0.00974519
QPCTL	-0.84088	0.0014739
AVPI1	-0.83851	0.0274248
SPAG4	-0.83631	0.0099448
RAB8B	-0.83594	0.032923
ARID3A	-0.83397	0.000635592
TNRC18	-0.83055	0.000695468
KCND1	-0.82628	0.0242489
CCBL1	-0.82365	0.00168404
CORO1B	-0.82339	0.000969727
GPD1L	-0.82044	0.00664492
ATF7IP	-0.82022	4.29785e-05
RHOG	-0.81562	2.92948e-05
ZNF257	-0.81554	0.0192845
GPR113	-0.81401	0.0345042
DUSP10	-0.81388	0.0360781
IKBIP	-0.80397	0.000854325
AMZ2P1	-0.80344	0.000734536
EPOR	-0.80155	0.00268907
STMN3	-0.80123	0.0390611
TRUB1	-0.8005	0.0464737
HMGA1	-0.79986	9.69857e-06
PPP1R32	-0.79817	0.0499487
PLXNB2	-0.79671	0.0484614
SIRPG	-0.7963	0.00424533
MAPK11	-0.7961	0.041945
QPRT	-0.79569	0.00678105
DCXR	-0.79533	0.000277536
SIAH2	-0.79518	0.00515276
HCST	-0.79481	0.0137514
LYSMD3	-0.79453	0.0123926
GTDC1	-0.79274	0.00570101
ITGAL	-0.79115	0.0133703
IL10RA	-0.78901	0.011681
SASH3	-0.78861	0.000809214
TMEM243	-0.78727	0.00909126
hADV38S2	-0.78663	0.0165877
PLEKHB2	-0.78615	0.00154618
HERPUD1	-0.78549	0.000586287
VCPIP1	-0.78319	0.00220026
ZNF280C	-0.78191	3.3043e-05
CCNG1	-0.78152	0.0314612
SREBF1	-0.77941	0.000164646
PBX4	-0.77513	0.0156204
STK17B	-0.77353	0.00549863
CNNM2	-0.77289	0.0240835
AURKA	-0.7725	0.00200249
B3GNTL1	-0.77211	0.0129161
MCEE	-0.76816	0.0152397
PIGX	-0.76481	0.000149016
TESC	-0.76441	0.0309926
INPP4B	-0.76374	0.00694238
ITGB2	-0.76369	0.00242508
ARRB1	-0.76234	0.0239029
SLC9A5	-0.76203	0.00700311
LRMP	-0.76156	0.0248372
CBX8	-0.76134	0.0255381
SNX22	-0.76032	0.041945
THEMIS	-0.75827	0.0263533
SMIM3	-0.75678	0.0158171
PCED1B	-0.75451	0.0200887
ANKZF1	-0.75365	0.0151279
CD55	-0.75318	0.0293656
RRN3P1	-0.7521	0.0128926
GBP2	-0.75208	0.00283339
HELB	-0.74825	0.00260921
STARD10	-0.748	0.00617613
IPMK	-0.74747	0.03406
ZNF101	-0.74698	0.00202577
HIP1	-0.74513	0.0484457
SCD	-0.74426	0.00113393
TREX1	-0.74291	0.0106295
MICB	-0.74219	0.00425627
IMPA2	-0.73898	0.00173209
IL21R	-0.73623	0.0257714
PTPRE	-0.73428	0.031956
PPP4R1L	-0.73059	5.3544e-05
SNRK	-0.72996	0.000121681
ZBTB25	-0.72917	0.0122973
FAM160B1	-0.72806	0.000523022
ARHGAP26	-0.72796	0.0116174
KCNAB2	-0.7277	8.30961e-06
IQSEC1	-0.727	0.0156824
NEIL3	-0.72677	0.000557391
ABHD17B	-0.72521	0.0024072
MSH5	-0.72508	0.0239875
ITPR1	-0.72196	4.62768e-06
MICA	-0.72023	0.0056204
ZNF273	-0.72008	0.00144685
ZNF670	-0.72003	0.0381697
HJURP	-0.71946	0.000992817
SH3PXD2A	-0.71667	0.00162841
RMI2	-0.71345	0.0225034
HBP1	-0.71056	0.0395446
SEC23B	-0.70973	0.0022131
PITPNC1	-0.70944	0.00150011
WDR74	-0.7072	0.00731164
GCNT1	-0.70718	0.0243015
SLFN12L	-0.70561	0.0232394
LEPROTL1	-0.70354	6.52015e-05
TOM1	-0.70097	0.0148199
RAP1A	-0.70039	0.046028
SLC27A5	-0.69802	0.0392729
XRCC6BP1	-0.69713	0.00317348
FBXO48	-0.69697	0.0223534
PTMA	-0.69476	0.00678105
SH2D1A	-0.6915	0.00293702
TVP23C-CDRT4	-0.6899	0.0219203
RAB4B	-0.6888	0.000155497
EDEM3	-0.68718	0.000188481
VAMP4	-0.68673	0.0382767
PTPN22	-0.68666	0.000258676
ORC1	-0.68654	0.000799792
MST4	-0.68531	0.00586234
ARHGEF6	-0.68108	0.00117121
LATS2	-0.68011	0.0278154
MBP	-0.67933	0.0267629
TKT	-0.67831	0.000680706
TRA	-0.67611	0.00172016
PRKRA	-0.67382	0.000125737
ITGA4	-0.66632	0.0215343
SYNGAP1	-0.66501	0.0429331
HIST1H2BN	-0.66295	0.00205663
PLCXD1	-0.66239	0.046028
PEX2	-0.66192	0.000665034
IDH2	-0.66172	0.00143242
PNRC1	-0.6605	0.0424877
MOB3A	-0.6599	0.0130072
TNFAIP3	-0.65939	0.00487042
ZNF292	-0.65933	0.000628847
PLAG1	-0.65822	0.0419229
USP28	-0.65726	0.00146039
DOCK10	-0.65718	0.000588714
SLC4A7	-0.65702	0.00998848
RHOH	-0.65628	0.0442528
PLEKHA8	-0.65605	0.0212741
CD96	-0.65519	0.0446459
ZNRF2	-0.65488	0.0026392
GRK5	-0.65272	0.0314612
SMG1	-0.65224	0.00418899
MXD3	-0.65099	0.0126155
PRKAG2	-0.65013	0.00230688
IKZF1	-0.64876	0.0190072
VMP1	-0.64746	0.000826239
ENO1	-0.64666	0.0295888
HIST1H2AD	-0.6454	0.0325603
TIMM21	-0.64398	0.0231628
SH2D3C	-0.64318	0.00657254
SH3TC1	-0.64285	0.0278154
SLC12A6	-0.64111	0.029908
MED26	-0.63929	0.0182165
TRIM22	-0.63777	0.00666071
SGTB	-0.63725	0.0222267
RBM7	-0.63687	0.0325083
GALC	-0.63632	0.0190991
RFX5	-0.635	0.000475862
ISOC2	-0.6329	0.0182391
ENO2	-0.63289	0.0250545
TBC1D4	-0.63271	0.0109144
PTPRJ	-0.63242	0.0207338
YIPF6	-0.6315	0.0223432
GFI1	-0.6314	0.012947
PRKCB	-0.63055	0.000413404
RCOR1	-0.62888	0.0226326
IRF2BPL	-0.62886	0.00710589
CORO6	-0.62875	0.0347313
YIPF2	-0.62873	0.0246544
LPXN	-0.62847	0.00258219
GOLGA2	-0.6284	0.0408697
TIPRL	-0.62735	0.00161397
RANGRF	-0.62559	0.00222164
PDE7A	-0.62484	0.000354463
TBC1D10A	-0.62447	0.00574394
SQRDL	-0.6242	0.0327822
STAMBPL1	-0.62169	0.0481339
PTPN6	-0.62133	0.00117121
HMGCS1	-0.6195	0.00945163
ERMP1	-0.61946	0.00537296
AV8S2	-0.61875	0.00320945
ITM2C	-0.61757	0.00480535
DSTN	-0.61689	0.0442847
PLEKHA2	-0.61564	0.00394132
PC	-0.61553	0.0212745
DNAJB1	-0.61535	0.0047762
LIMS1	-0.61497	0.038358
IQCJ	-0.61343	0.000381505
CTNND2	-0.61343	0.00937208
OTOG	-0.61343	0.0121091
FAM25C	-0.61343	0.0280697
A1CF	-0.61343	0.0282568
ACAN	-0.61343	0.0386366
CCL19	-0.61343	0.0481757
CHRM2	-0.61343	0.0494322
MRO	-0.61343	0.0494322
KDM4B	-0.61255	0.027543
MSL2	-0.61205	0.00540837
ARNTL	-0.61112	0.00471641
GMCL1	-0.61044	0.00554305
NINJ1	-0.60978	0.00201844
KLF9	-0.60959	0.0474329
SPINT2	-0.60885	0.0330726
PTPN1	-0.60473	0.0131222
SKAP1	-0.60273	0.000382946
FAM117B	-0.6021	0.0117762
RDM1	-0.6021	0.0239581
SLC9A3R1	-0.6018	0.0030895
TCFL5	-0.60165	0.0148485
MAD1L1	-0.60061	0.00232796
TPD52	-0.60051	0.0219203
RPL39L	-0.60033	0.00198897
SUSD3	-0.5999	0.00612713
NEK7	-0.5999	0.0251187
NDUFB8	-0.5992	0.00103664
OCEL1	-0.59715	0.0485087
RUNX3	-0.59659	0.00345644
SPAG9	-0.59402	0.00480878
PHF1	-0.59314	0.0112097
RNASEH2B	-0.59291	0.00084955
MPZL3	-0.59251	0.0480058
ITK	-0.59248	0.0079012
RBM15	-0.59211	0.0114154
PPP1R12B	-0.5913	0.00622613
CLEC2D	-0.59037	0.0122331
DDAH2	-0.5885	0.0425351
CNIH	-0.58813	0.047426
NUDCD2	-0.58702	0.0197223
YIF1B	-0.58635	0.0095763
UNC119	-0.58628	0.00593806
DEAF1	-0.58344	0.00430181
FCHO1	-0.58272	0.00195321
PPP1R9B	-0.58073	0.00289162
AAK1	-0.57929	0.0343425
LRRFIP1	-0.57599	0.000178748
TAPT1	-0.57524	0.000971664
CSNK1G3	-0.57237	0.02845
STK38	-0.57207	0.0341072
NAP1L4	-0.57148	8.65578e-05
OBFC1	-0.57114	0.00136217
PPP6R1	-0.57054	0.000580859
WHAMMP1	-0.57044	0.0110868
HAUS6	-0.5699	0.00909321
ARL6IP5	-0.56985	0.000389585
IL2RG	-0.56969	0.00279203
LCORL	-0.56776	0.0263533
POLR2H	-0.56765	0.0341835
LNX2	-0.56722	0.000435267
RTKN2	-0.56578	0.0293474
PVT1	-0.5656	0.037931
CD3D	-0.56515	0.0141972
CBX4	-0.56488	0.00294602
ACAP1	-0.5648	0.0121793
NUP98	-0.56427	0.000393243
BUB1	-0.5642	0.01154
FAM115C	-0.56253	0.0077867
GRAMD1A	-0.56196	0.00339904
RYK	-0.56125	0.00128868
MTFP1	-0.55952	0.0076409
ACYP1	-0.55918	0.0287826
ARHGAP15	-0.55889	0.0116174
CSTF2T	-0.55878	0.0122438
PAK2	-0.55829	0.00247219
TMF1	-0.55808	0.00376749
PRKD2	-0.55796	0.0138228
RAP2A	-0.55789	0.0251749
CDR2	-0.55749	0.00345524
CMTM8	-0.55583	0.0370216
FAM195A	-0.55528	0.0161846
JARID2	-0.55523	0.00312954
SUPT4H1	-0.55495	0.00985251
CEP120	-0.55208	0.0150563
ZNF726	-0.55177	0.0331294
ACOT8	-0.55011	0.00173209
LAPTM4A	-0.5498	0.0443534
LEPR	-0.54973	0.045477
SNX25	-0.54876	0.0388004
DNHD1	-0.54757	0.0395446
SDHA	-0.54709	0.000399603
ALDOA	-0.54608	0.0064107
TTF1	-0.54549	0.00192714
PPM1K	-0.54543	0.00990921
SNN	-0.54441	0.0139534
HSH2D	-0.54433	0.0114892
SLA2	-0.54425	0.00436703
LSM11	-0.54391	0.0298423
TERC	-0.5434	0.0472531
FAM126A	-0.54275	0.0381444
TRPT1	-0.54216	0.0287739
SLC39A10	-0.54179	0.0133005
FDX1	-0.54106	0.045565
UNKL	-0.53989	0.0205861
C18orf54	-0.53937	0.0455514
LONP1	-0.53867	0.00945163
GNB5	-0.53807	0.00409485
VIMP	-0.53728	0.0294056
LPAR6	-0.537	0.0439013
RUVBL2	-0.53671	0.0137165
HTRA2	-0.53579	0.00902448
ADRBK1	-0.53578	0.00248647
ZNF581	-0.5348	0.0105349
HECA	-0.5347	0.046997
PRDX1	-0.53462	0.0325472
SPTY2D1	-0.53163	0.032465
SCARNA12	-0.53023	0.00488836
SUV420H2	-0.52809	0.0267795
JOSD1	-0.52791	0.00188698
TRAF3	-0.52725	0.000108114
RNF149	-0.52671	0.00254034
MMS22L	-0.52647	0.0343375
PSMB10	-0.52582	0.0137165
RPS21	-0.52526	0.00296375
NFKB2	-0.52471	0.0395447
SUCLG2	-0.52432	0.00603744
BTG1	-0.52405	0.0421598
ZNF217	-0.52236	0.00645518
POLG2	-0.52199	0.0491744
HOOK1	-0.52097	0.00311336
COTL1	-0.52085	0.0337562
ZNF486	-0.52059	0.0116174
GRK6	-0.5205	0.00163092
GPI	-0.51952	0.039778
NHEJ1	-0.51867	0.00163533
PRNP	-0.5186	7.87191e-05
UPRT	-0.5186	0.0493353
BIN1	-0.51803	0.0280168
RASGRP1	-0.51747	0.000326121
ELF1	-0.51679	0.00664692
SLX1A	-0.51652	0.00556996
SRP68	-0.51592	0.00907026
NBEAL2	-0.51557	0.00284501
PPP1R35	-0.51489	0.00467857
AKR1A1	-0.51446	0.000958309
DPH5	-0.5126	0.00210114
HSP90AB1	-0.51228	0.0409797
BLZF1	-0.51198	0.0164812
FAM107B	-0.51136	0.0172763
SGOL1	-0.51135	0.038171
FAM105B	-0.51118	0.0287384
MND1	-0.50962	0.0142075
EBP	-0.50922	0.0314612
PCSK7	-0.50919	0.00805246
FAM110A	-0.50895	0.00243985
PJA2	-0.50881	0.0434128
MRGBP	-0.50879	0.0247552
HEIH	-0.50804	0.0196196
SYNGR2	-0.50772	0.00684869
UFL1	-0.50702	0.00243065
CARHSP1	-0.50618	0.00560338
MGAT4A	-0.50555	0.0443534
FAM84B	-0.50497	0.0325603
CRTC2	-0.50464	0.013559
NFE2L2	-0.50412	0.00320551
PGPEP1	-0.50404	0.0491744
CCM2	-0.50333	0.038756
SAMHD1	-0.50319	0.00586234
ERI1	-0.50172	0.0392686
RPTOR	-0.50162	0.0439168
CSK	-0.50101	0.0192902
FOPNL	-0.50081	0.0437402
CAMK2G	-0.49916	0.00173184
UQCRC2	-0.49885	0.00081307
ASF1A	-0.49863	0.00518257
Metazoa_SRP	-0.49757	0.00813683
SIT1	-0.49755	0.0109835
MASTL	-0.49556	0.0280397
APOL3	-0.49523	0.0240432
PHF7	-0.49481	0.0388945
BNIP3L	-0.49356	0.0271123
TMEM214	-0.49304	0.0137514
PHF10	-0.493	0.0160166
UFD1L	-0.49189	0.0272253
CRTC3	-0.49172	0.0252566
DENND1C	-0.4917	0.00519683
SQSTM1	-0.48895	0.0194081
SACM1L	-0.48872	0.0118436
ICAM3	-0.48851	0.0102767
PDIK1L	-0.48843	0.0186279
RNF19A	-0.48836	0.0228358
BACH1	-0.48639	0.0156858
RTTN	-0.48423	0.00368806
FOXN3	-0.484	0.00721051
H2AFJ	-0.48352	0.0167264
SFXN1	-0.48216	0.0113614
ZNF100	-0.48016	0.00583392
CEP97	-0.48009	0.038915
QRSL1	-0.48007	0.00410166
CARS	-0.47951	0.0291883
DHRS13	-0.47766	0.0437402
SLC25A42	-0.47753	0.0416265
EED	-0.47653	0.0219203
DDX50	-0.4765	0.00805246
CUTA	-0.47622	0.0431008
CDCA7L	-0.47599	0.0139688
TK1	-0.47598	0.0299314
DENND2D	-0.4758	0.0415861
TMEM204	-0.47562	0.0479324
ZBTB21	-0.47334	0.00258648
CYC1	-0.47326	0.0300229
RELL1	-0.47292	0.0290224
TMEM55B	-0.47122	0.026385
ERAP2	-0.47039	0.0109561
ALDH18A1	-0.47035	0.00900249
NDUFV1	-0.46975	0.0165477
TRMT2A	-0.46821	0.0250834
OXNAD1	-0.46704	0.039778
PRICKLE3	-0.46634	0.0493683
ZBTB5	-0.46617	0.00452134
SEPT6	-0.46556	0.0299926
UBE2R2	-0.46425	0.0148205
TBL1XR1	-0.46342	0.0334094
GTPBP1	-0.46262	0.0215343
TMEM167A	-0.46238	0.0449902
ARFGAP3	-0.46153	0.0485885
LHPP	-0.46125	0.0479324
ZC3H12A	-0.45772	0.0347704
LAPTM5	-0.45611	0.0210634
CANX	-0.45546	0.0118436
PEX16	-0.45516	0.0168559
ZSCAN25	-0.45514	0.00399474
TMEM194A	-0.45508	0.0372691
RFWD3	-0.45469	0.0443534
TBC1D23	-0.45081	0.0410592
CD53	-0.44755	0.0341479
RALBP1	-0.44737	0.00011865
ECI1	-0.44729	0.0330707
UTRN	-0.44477	0.0235973
IPO5	-0.4439	0.0488242
BLOC1S6	-0.4405	0.0382767
EBPL	-0.44024	0.0463084
POLQ	-0.43917	0.0125672
RBM12B	-0.4388	0.00381844
MAD2L2	-0.43824	0.0250354
BTD	-0.43685	0.0424263
EZR	-0.43599	0.0214658
GPSM2	-0.43583	0.0251749
IFT122	-0.43563	0.00161759
EEF2	-0.43555	0.0260541
DGKZ	-0.43514	0.0273604
RAD21	-0.43428	0.0439056
ERCC5	-0.43407	0.00240614
NPHP4	-0.43393	0.0382371
ZNF680	-0.4321	0.0293656
TMEM245	-0.42755	0.00957311
ADAM15	-0.42736	0.0280697
ECH1	-0.42719	0.0154156
CDC42SE2	-0.42406	0.0312298
DNAJA2	-0.42394	0.00214336
WDTC1	-0.42315	0.0293679
CEP128	-0.42195	0.0374888
WDR89	-0.4217	0.00522629
TOP2B	-0.42153	0.00136081
SHMT2	-0.42062	0.000608122
GANAB	-0.41966	0.00125284
MKRN1	-0.41885	0.0236423
SLC35E1	-0.41795	0.0236682
ZBTB44	-0.41772	0.04499
WDR48	-0.41552	0.0216254
GNL1	-0.41521	0.00689307
PAPD5	-0.41483	0.0473229
TMEM134	-0.41466	0.038756
SERP1	-0.41433	0.0317342
NT5DC1	-0.41421	0.00537516
STK39	-0.414	0.0448777
WDR7	-0.41309	0.0477292
METTL13	-0.41272	0.0174289
UHRF1BP1L	-0.41195	0.00618618
AIFM1	-0.4111	0.00824154
LIMD1	-0.40993	0.0265497
FDFT1	-0.40975	0.0146453
AIP	-0.40942	0.0365408
MDH1	-0.4091	0.0382767
PPP2R4	-0.40886	0.0158171
EME1	-0.40865	0.0352237
CLIC1	-0.4086	0.016148
TRAC	-0.40826	0.0128028
ERGIC1	-0.40774	0.0481177
RNF157	-0.40766	0.0493353
BAG4	-0.40653	0.0488485
STAG3L2	-0.40629	0.0186201
NKAP	-0.40299	0.0221866
LDHB	-0.40057	0.0389228
RELB	-0.39987	0.0131871
ULK3	-0.39955	0.00715664
ASXL1	-0.399	0.0017552
RNF167	-0.39724	0.0230217
DEF6	-0.39711	0.0226733
WHSC1L1	-0.39691	0.0245506
NR3C1	-0.39661	0.0308928
PTPRC	-0.39385	0.00602478
UQCRC1	-0.39384	0.0271123
ETFB	-0.39366	0.0260532
CDK7	-0.39242	0.0442972
SEC24D	-0.39211	0.0359327
ATP6V1G1	-0.39122	0.0150629
ZNF519	-0.39038	0.0473883
RPL18A	-0.38992	0.00704924
PPIF	-0.3894	0.0409416
COX10	-0.38923	0.0343635
ANAPC16	-0.38895	0.00945163
SH3BP1	-0.38865	0.0242149
RAB24	-0.38831	0.0163588
PIKFYVE	-0.38826	0.025991
PRPSAP2	-0.38762	0.038941
CLINT1	-0.38756	0.00205175
NCK2	-0.38543	0.0327822
GPANK1	-0.38229	0.0346048
CRLF3	-0.3817	0.00137082
FAM102B	-0.38115	0.0252434
BRWD1	-0.3806	0.0488008
CREBL2	-0.38007	0.0137079
RPS2	-0.3786	0.0171001
BRD7	-0.37841	0.0426559
PABPC4	-0.37712	0.0216254
MORC3	-0.37704	0.0407693
CXXC1	-0.37414	0.0222268
ZNRD1	-0.37331	0.0360781
SDHAP1	-0.37257	0.0397664
HPS5	-0.37242	0.00597501
MID1IP1	-0.37219	0.0358538
RPS5	-0.372	0.0148485
LAMP2	-0.3713	0.031697
ASCC1	-0.36832	0.00847211
FAU	-0.36758	0.0151197
UBQLN1	-0.36744	0.0310993
ABHD3	-0.36729	0.0283415
RILPL2	-0.36695	0.0407515
ABCC1	-0.36616	0.0256077
LRRC8B	-0.36593	0.0272484
RPL3	-0.36206	0.0326486
MTMR4	-0.36075	0.00701532
COPG1	-0.36053	0.0347975
NOB1	-0.35845	0.04499
TCF3	-0.35807	0.0395447
DARS	-0.357	0.040441
HADH	-0.35591	0.00282648
GCLC	-0.35428	0.0192084
HAX1	-0.34942	0.0293022
KANSL3	-0.34753	0.00657254
KEAP1	-0.34435	0.0289241
UBA2	-0.34356	0.0258147
ALDH9A1	-0.34319	0.0160964
RPS9	-0.34151	0.0349311
SEPT1	-0.33891	0.04499
TXNDC12	-0.33828	0.0484614
ELOVL5	-0.33748	0.0300153
EIF3K	-0.3373	0.0302417
DPAGT1	-0.33623	0.0361705
LPIN1	-0.33585	0.045169
TMED10	-0.33528	0.0256002
MYSM1	-0.33385	0.0479522
RLTPR	-0.33302	0.0320882
CPT1A	-0.32779	0.0277876
AMZ2	-0.3265	0.0359841
DCAF16	-0.32531	0.0386366
RAPGEF6	-0.32406	0.0182391
STAT5A	-0.32326	0.0431008
NPM1	-0.32307	0.0387448
DAXX	-0.31989	0.0297795
TRIM4	-0.318	0.02723
FNIP1	-0.31722	0.0485955
POLR1D	-0.31702	0.0264446
HAUS4	-0.31426	0.0164812
ZNF330	-0.31215	0.0144799
GSTO1	-0.31085	0.049036
CDKN2AIP	-0.29903	0.0470231
ELP2	-0.29721	0.0493272
ZNHIT3	-0.29429	0.0439056
SLC10A7	-0.29375	0.037684
SEC24C	-0.28617	0.0192084
ATG16L2	-0.27944	0.0243099
RPL7A	-0.27854	0.0452722
EIF2S3	-0.27292	0.0483136
SYS1	-0.27069	0.0320629
FAM104A	-0.26579	0.0133005
INPP5B	-0.25859	0.0270004
CNST	-0.24588	0.0409416
PRKAR1A	-0.24438	0.039778
DCP1A	-0.23423	0.0291994
VTI1B	0.22428	0.0439013
ENSA	0.2281	0.0138413
FBXW2	0.23412	0.0412802
MRPS14	0.23951	0.0259361
RSBN1L	0.24232	0.0472205
HECTD1	0.24858	0.0431297
SAP30BP	0.25519	0.039524
PPWD1	0.25526	0.0341709
C17orf85	0.25534	0.033273
UTP14C	0.2578	0.0353089
PARG	0.25896	0.045169
CNOT2	0.26163	0.0278154
ACTR10	0.2632	0.029908
FUBP3	0.26321	0.0419321
AP3M1	0.2641	0.00657254
IKBKAP	0.26636	0.0198304
SMARCE1	0.26687	0.0206103
MRPS10	0.26754	0.048816
PRPF18	0.27126	0.0488485
AKAP8	0.27395	0.0369455
ERAP1	0.27535	0.0226733
VPS25	0.27597	0.0313972
RER1	0.2769	0.0285385
SEPT2	0.27967	0.00679805
NENF	0.27981	0.0293474
SUPT7L	0.28065	0.0331294
MICU1	0.2812	0.0189967
RBM5	0.28453	0.0173062
THOC2	0.28613	0.0137165
FAM204A	0.28615	0.021198
ACOX1	0.28677	0.016991
COPS7B	0.28788	0.0386153
ATXN10	0.29031	0.0492025
RABL3	0.29322	0.0386366
CD47	0.29386	0.047426
EXT2	0.29532	0.03154
NSMAF	0.29557	0.0189208
VCP	0.29619	0.0421328
OSBPL11	0.29672	0.0450869
PEX11B	0.29695	0.0176273
SEC22C	0.29756	0.016991
UBE2Q1	0.29767	0.0419808
WAPAL	0.29794	0.0163358
TBK1	0.30102	0.0132827
LAMP1	0.30158	0.0325092
SS18	0.30366	0.0478568
HMGN4	0.30486	0.0326017
CHM	0.30636	0.0280397
SCYL2	0.30684	0.020917
TCEAL8	0.30841	0.0360781
PPP1R8	0.30844	0.0240602
STK24	0.30872	0.0171614
BMS1	0.30933	0.0116707
DEDD	0.30964	0.0325929
ZDHHC7	0.31006	0.0392686
TLN1	0.31026	0.00173209
PRCC	0.31032	0.045169
PTPRA	0.31068	0.0224986
AREL1	0.31099	0.0266704
CAP1	0.31156	0.0258478
PYURF	0.31157	0.0429929
NUPL2	0.31202	0.0442033
PHAX	0.31304	0.00896439
PAFAH1B1	0.31566	0.00242508
ECD	0.31602	0.0153864
XPO6	0.31605	0.000702722
POLK	0.31616	0.0113505
STX18	0.31657	0.0278163
TTC1	0.32166	0.0409416
GFOD2	0.32197	0.0394015
DDX42	0.32224	0.00414364
CUL5	0.32314	0.00904903
DNAJC8	0.32419	0.0479522
MCUR1	0.32483	0.0459201
DNAJC24	0.32555	0.0368691
RTF1	0.32667	0.032808
C10orf76	0.32684	0.0396796
IP6K1	0.32807	0.0399921
CEP89	0.32828	0.016104
GTF3C2	0.3284	0.0443656
APP	0.32849	0.00574394
ASTE1	0.32898	0.0377433
BTBD10	0.33121	0.0280611
RANBP2	0.33197	0.0243015
RBM23	0.33232	0.0291426
ANKRD17	0.33247	0.019153
TBCCD1	0.3333	0.0174864
NSDHL	0.33365	0.0485592
PWP1	0.33468	0.00701532
PARP6	0.33602	0.0259126
UTP14A	0.33604	0.0445476
NRDE2	0.33633	0.038915
YTHDF2	0.33701	0.0109963
KXD1	0.33716	0.0272253
RASSF3	0.33731	0.0472745
INTS3	0.33771	0.00945163
FTSJD1	0.33839	0.0498296
CSNK1G1	0.34019	0.00744785
ATE1	0.34028	0.023703
SENP6	0.3413	0.0165615
PDLIM5	0.3417	0.0361997
TLK2	0.34253	0.00182695
GMEB1	0.34402	0.0148205
LRCH3	0.34405	0.0193717
ZNF621	0.34447	0.0419928
EIF2S1	0.34466	0.0494876
UBE2L3	0.34483	0.0338074
AGPS	0.345	0.0492442
ZNF407	0.34577	0.0389228
TPM3	0.34582	0.0243015
OSGEP	0.34602	0.0359219
ZNF236	0.34618	0.00575801
NOL10	0.34657	0.0431008
MOCS2	0.34661	0.0352581
TRPM7	0.34815	0.0283218
IAH1	0.3486	0.0154748
DDX3X	0.34875	0.0441347
CDK9	0.34946	0.0449376
ATXN7L3	0.3501	0.040457
HAUS1	0.35017	0.0115854
TRMT11	0.35173	0.0443534
CD2AP	0.35214	0.031714
TYW1	0.35253	0.0179903
R3HCC1	0.35255	0.0174864
AACS	0.3531	0.038756
CERS5	0.35327	0.0295888
UBE2E1	0.35389	0.0280397
DERA	0.35415	0.0481757
SMURF1	0.35427	0.0342804
INTS6	0.35504	0.0425231
RNF220	0.35507	0.0189897
MAP4	0.35546	0.00900249
DDX10	0.3562	0.0448816
RPL23AP82	0.3564	0.0491546
ELMOD3	0.35788	0.038756
VWA8	0.3592	0.0095599
NEK9	0.35976	0.0323023
ADO	0.35987	0.027543
NOMO1	0.35995	0.0184939
CCDC132	0.36111	0.0223885
EIF2B4	0.36185	0.0220596
MEF2A	0.36324	0.0361997
TRIP4	0.36352	0.0421328
TMEM25	0.3638	0.00990921
UBE3C	0.36385	0.00958176
DDX1	0.36457	0.0325603
RNF141	0.36605	0.0349284
EBAG9	0.3672	0.0256706
BAZ1B	0.36778	0.0247552
FBXW4	0.3688	0.025565
LRRC57	0.36917	0.0176247
IWS1	0.36919	0.0442528
CCDC138	0.37103	0.0454965
GLOD4	0.37109	0.00242508
FIP1L1	0.37139	0.0157524
ITGB1BP1	0.37177	0.0233029
EIF2B1	0.37242	0.00834417
C6orf47	0.3736	0.0322714
MFN1	0.37373	0.00367239
OCIAD2	0.374	0.0112488
NOTCH2	0.37416	0.0450869
TAF1	0.37471	0.00945163
RNF14	0.37527	0.00841625
DHX30	0.37647	0.0341479
ARMCX2	0.3771	0.0450278
CCDC14	0.37786	0.0350548
TOR3A	0.37806	0.0163358
HEATR5B	0.37822	0.00465915
LRRC41	0.37917	0.0152943
PI4KA	0.3802	0.00666242
SRSF8	0.3805	0.0259934
KATNAL1	0.3824	0.0206092
KIDINS220	0.38419	0.00623535
AHSA2	0.38444	0.0496291
THRAP3	0.38449	0.0274248
ZBED5	0.38454	0.0027688
MCM9	0.38456	0.00289162
RAD54L2	0.38567	0.0115854
CYB5R3	0.3857	0.0296704
EXOC6	0.38588	0.0310993
NSD1	0.38646	0.0111993
MED24	0.38773	0.00497635
CDC7	0.38809	0.0154487
RPF1	0.38856	0.0360781
RNF185	0.38861	0.044521
PLCB3	0.38889	0.0158802
TMEM192	0.38997	0.0107716
MTA3	0.3902	0.0076615
ITGB1	0.39032	0.00680367
KIF16B	0.39065	0.0120242
TOR1A	0.39065	0.0174915
SCFD1	0.39151	0.00853191
SUDS3	0.39236	0.00910831
ARMCX6	0.3925	0.0178822
TRIP12	0.39268	0.0056204
EML4	0.39298	0.00242508
FBXO31	0.39324	0.0204063
GCFC2	0.39395	0.0409179
ALDH3A2	0.39435	0.0173062
ZNF26	0.3952	0.013776
TAX1BP3	0.39595	0.0312619
SPG21	0.39605	0.00354827
MPRIP	0.39636	0.0026392
RNF115	0.39668	0.0254819
ZFYVE16	0.39862	0.00424158
CLOCK	0.40017	0.015689
EIF2AK4	0.40038	0.00981945
ZNF271	0.40112	0.0177781
ERI3	0.40143	0.0320614
YWHAB	0.40179	0.00782809
FAM120AOS	0.40193	0.0364064
CAB39L	0.40251	0.0439013
XRCC4	0.40264	0.0395446
UBLCP1	0.40277	0.0385362
VPS29	0.40328	0.00510111
DENND5A	0.40334	0.0479522
TMEM237	0.40436	0.0431673
ZNF346	0.40547	0.0425516
RSU1	0.40571	0.012299
PRKRIR	0.40593	0.0253445
ZNF592	0.40654	0.0150297
BBS7	0.40672	0.00669946
DDX19A	0.40785	0.0239029
DHX29	0.40793	0.012284
TTC4	0.40876	0.0064107
GNG5	0.41013	0.04499
TYW3	0.41159	0.0137258
MTMR2	0.41182	0.0138049
PDPK1	0.41184	0.0222971
ZC3H8	0.41251	0.0151489
EIF4G2	0.41363	0.0342252
EMC8	0.414	0.0452222
WWP2	0.41413	0.00170832
MAPK1IP1L	0.41477	0.00929052
HMGB3	0.41523	0.0232942
ZNF398	0.41537	0.048969
OGFOD1	0.41698	0.0147014
ABI2	0.41737	0.0117272
BCL7B	0.41748	0.00821011
DBR1	0.41915	0.018144
UBP1	0.41948	0.0252566
RUFY2	0.41999	0.0359327
ANKMY2	0.42158	0.00256174
WDR11	0.42172	0.0496196
CAMSAP1	0.42176	0.0107961
EXOSC10	0.42193	0.012947
KLC1	0.42406	0.00888223
MAPKAP1	0.42468	0.001892
PPT1	0.42468	0.00485419
DOM3Z	0.42493	0.0138727
SH3GLB2	0.4253	0.0494322
SIRT7	0.42531	0.0218508
HSD17B4	0.42538	0.0026862
VEZT	0.42552	0.00041418
ATP8B2	0.42595	0.00621774
HIBCH	0.42633	0.038171
DCTD	0.42692	0.00813683
MORC4	0.42707	0.0159221
VPS36	0.42708	0.000939309
MKI67IP	0.4272	0.0437903
DNMT3A	0.42753	0.00648835
FBXL5	0.42879	0.00651679
C9orf64	0.42928	0.0342089
KIF13B	0.42986	0.0317342
GOLPH3L	0.43005	0.0443597
ATR	0.43091	0.00244769
EXTL3	0.43096	0.0252434
GORASP1	0.43142	0.0288842
NPTN	0.43143	0.0186463
XPA	0.43228	0.0118436
FEM1A	0.43334	0.0442014
PHKB	0.4334	0.0326413
TTC19	0.43348	0.00171399
MYL6	0.43402	0.0341543
TMCO3	0.43429	0.0188912
DNM1L	0.43465	0.00084955
GLYR1	0.43513	0.0166492
CHMP3	0.43589	0.048742
RAC1	0.43624	0.00110786
MRPL20	0.44066	0.0151489
NAA40	0.44246	0.000597127
SIPA1L1	0.44246	0.0362335
KIF1C	0.44281	0.0493272
RAP1B	0.44359	0.00283339
MICU2	0.44423	0.0015915
LITAF	0.44424	0.0191495
CROT	0.44425	0.037753
CD63	0.44459	0.029908
STAT6	0.44465	0.0484457
RNF25	0.44507	0.0499474
TRIM21	0.44598	0.0276425
ARHGAP21	0.44652	0.00961782
SLC23A2	0.44737	0.00346573
MAPK1	0.44814	0.0137514
POMGNT1	0.44887	0.00657844
WRN	0.44896	0.0439056
RP9	0.44903	0.0333074
UBE2E3	0.44957	0.01048
C16orf72	0.44965	0.00971339
CCBL2	0.4499	0.0395446
DUSP12	0.45048	0.0331854
PANX1	0.45063	0.037976
NCSTN	0.45264	0.00617366
NGFRAP1	0.45277	0.0426191
RAB22A	0.45311	0.0213977
PACSIN2	0.4536	0.00137082
HIATL1	0.4539	0.00355384
TBC1D1	0.45427	0.0259255
NPEPPS	0.45594	0.0450278
METTL25	0.45615	0.0257166
SPTAN1	0.45851	0.0113461
HUS1	0.4615	0.0258188
AP3D1	0.46249	0.00130635
CD2BP2	0.46251	0.00332307
ARHGAP35	0.46393	0.0136054
DOPEY2	0.4645	0.0436635
REEP5	0.46478	0.0308502
CSTF3	0.46508	0.0150297
WDR46	0.46691	0.0177781
STRADA	0.46707	0.00608242
HEATR1	0.46751	0.0107507
DMTF1	0.46848	0.00795503
RBM6	0.46914	0.00465915
LYRM2	0.46948	0.00479306
SRRD	0.47013	0.0280762
PYGB	0.47101	0.0362008
PIP4K2C	0.4711	0.0254819
AIG1	0.47253	0.0341072
SEPW1	0.47255	0.0229855
AGFG1	0.47317	0.00175998
ARL3	0.47361	0.00289729
LRRC14	0.47453	0.0280697
SCCPDH	0.47506	0.00408839
ARF3	0.47519	0.00312752
MTFMT	0.47535	0.0052095
PHF20L1	0.47576	0.0113614
EARS2	0.4764	0.00729443
ERCC1	0.47786	0.0359396
SOAT1	0.47888	0.0121793
E2F4	0.47916	0.0290224
ABHD12	0.48049	0.00166894
C12orf4	0.48077	0.0255381
RAD50	0.48228	0.0104528
TP53BP2	0.48263	0.00900249
ALS2	0.48265	0.0392737
SNRPD3	0.48346	0.0280397
MYO19	0.48384	0.0263989
PRPF31	0.48428	0.0222946
CD99L2	0.48454	0.0455514
TCP11L1	0.48482	0.035559
RUFY1	0.48635	0.00628428
DFFB	0.48767	0.0117272
FAM136A	0.48835	0.00516949
ACER3	0.48897	0.0254819
ERCC6L2	0.49162	0.0059852
MAP3K13	0.49207	0.0166625
BTN2A1	0.4927	0.000494942
RPL7L1	0.49275	0.012155
ADD1	0.4946	0.000211944
TBCE	0.49478	0.000834913
VPS45	0.49554	0.00482716
TM9SF1	0.49561	0.00985251
FAM200B	0.49592	0.042548
BAG1	0.49639	0.0409987
NSUN2	0.49692	0.0450812
PCYT1A	0.49693	0.0230683
CD40	0.49735	0.046028
SUV420H1	0.49884	0.00195321
SRF	0.50029	0.00840034
KIF21A	0.50077	0.012947
EXOC7	0.50299	0.0113614
NSMCE4A	0.50353	0.025097
TCF25	0.50395	0.00372333
MEAF6	0.50443	0.00211531
VWA9	0.50476	0.00289729
MAGOH	0.50564	0.0252434
MPND	0.5059	0.0267846
ANKRD26	0.50607	0.0112748
HDHD3	0.50615	0.0137079
NSRP1	0.5062	0.0154487
PITPNA	0.50748	0.0326682
N4BP1	0.50781	0.0117272
UNK	0.50949	0.00735214
REPS1	0.50989	0.00484467
TMEM120B	0.51042	0.0410334
TP53BP1	0.51046	0.00674053
CTSB	0.5113	0.025565
MPZL1	0.51165	0.0111454
C12orf43	0.51243	0.0243066
PFDN1	0.51258	0.00242508
FLAD1	0.51449	0.0278154
TIMM13	0.51507	0.0262038
SMARCD1	0.51537	0.00684869
CC2D1B	0.5163	0.00992778
FADS1	0.5165	0.046028
EFR3A	0.51715	0.00338869
HN1L	0.51725	0.0293474
ABCF2	0.51782	0.0257166
COMMD2	0.51789	0.00354634
BTBD6	0.51793	0.00820181
FPGS	0.51804	0.046737
RUSC1	0.51853	0.0225958
RARG	0.51925	0.0423425
GTF2H2	0.52036	0.00781833
GBA	0.52247	0.033084
CYP20A1	0.52298	0.00251013
NCLN	0.5236	0.0190493
ANKRD52	0.52376	0.0423267
PTPLAD1	0.52386	0.00991331
LZTR1	0.52427	0.00820181
TBCEL	0.52478	0.0103011
POP5	0.52484	0.0224556
DCTN1	0.52505	0.00498448
DNAJB12	0.52575	0.00936149
TCEAL1	0.52591	0.00974519
HERC2P7	0.52635	0.0452222
TIMM22	0.52705	0.0101048
CEP104	0.52721	0.00760442
DAG1	0.52903	0.0421328
DHX57	0.52935	0.012053
TOB2	0.53017	0.022225
MYH10	0.53206	0.000916267
NF1	0.53236	0.01983
SDR39U1	0.53243	0.0217329
ERCC8	0.53396	0.0195589
ZZZ3	0.53429	0.000470541
CEP290	0.53506	0.000714864
ZNF584	0.53523	0.0364573
DHCR24	0.5369	0.00484522
FAM195B	0.53829	0.0113528
FASTKD1	0.53875	0.00183378
KLF3	0.53878	0.0448753
RABIF	0.53941	0.00857746
TRIM8	0.5404	0.0163081
DMAP1	0.54206	0.0113772
TMEM179B	0.54222	0.0174725
PLXNA3	0.54361	0.0113772
AP1G2	0.54386	0.00290307
PCTP	0.54393	0.0269648
ZSWIM7	0.54414	0.0223655
TMEM19	0.5444	0.00354634
ARL13B	0.54465	0.0314612
IPP	0.54515	0.016991
NEDD4	0.5458	0.00225076
ORMDL2	0.54666	0.010886
ZNF37A	0.54722	0.0113614
EMC10	0.54755	0.0311456
DPH3	0.54774	0.0241007
ITFG2	0.54902	0.000210076
DYNLRB1	0.55019	0.00604784
PPP6R3	0.55058	0.00258064
SERPINH1	0.55167	0.0172936
MFSD6	0.55169	0.0102488
RALGAPB	0.55227	0.00447357
GOLGA8B	0.55319	0.0492025
DDX5	0.55369	0.0299207
PGM1	0.55372	0.00289817
DUSP23	0.55485	0.0363515
TCTN2	0.55495	0.04499
C4orf27	0.55552	0.000231307
ICMT	0.55756	0.0491323
UBXN2A	0.559	0.000195385
NADK	0.5596	0.00850652
ATL3	0.56008	7.68564e-06
EMC1	0.56021	0.000126251
ATP10D	0.56035	0.0298243
RRAGB	0.56258	0.0276619
GPX7	0.56309	0.0229812
SIK3	0.56384	0.0410592
EIF4G1	0.56474	0.028777
DDX52	0.56579	0.00661248
RABEP1	0.56639	7.19547e-05
ATP6V0E2	0.56797	0.00333933
TUBGCP5	0.56807	0.0120242
RIPK1	0.56817	0.0431008
ZMYM4	0.56822	0.013762
TTC5	0.56891	0.0202066
ATG7	0.5694	0.00393076
GTF2I	0.5716	5.28153e-05
GRWD1	0.57199	0.0277178
NAP1L5	0.57204	0.0256605
MTERFD3	0.57228	0.0442847
TIMM8B	0.57233	0.00177097
EXD2	0.57244	0.000867823
ZC4H2	0.57298	0.00330679
FAM160B2	0.57541	0.0036654
PTGR2	0.57573	0.0363515
SREK1	0.57646	0.039524
OGFOD3	0.57818	0.0319317
GDAP1	0.57865	0.0362335
PSME3	0.57882	0.0165477
ZNF780B	0.57923	0.0421328
EHD4	0.58029	0.00499702
MEF2BNB	0.58093	0.0443654
NKIRAS2	0.58219	0.000470541
MGC72080	0.5834	0.032465
PPIP5K1	0.584	0.0140688
NMI	0.58467	0.0495928
FAM169A	0.58505	0.0117272
TSTD2	0.58529	0.0337962
TAF9B	0.58557	0.0479324
DNAJC30	0.58654	0.00294602
LRCH1	0.58667	0.00820181
IDE	0.58669	0.00202577
TTLL4	0.58767	0.0120027
BRD9	0.5885	0.000854643
ERBB2IP	0.5885	0.00198897
WDR41	0.58874	0.00150011
DUSP14	0.58918	0.02723
NPEPL1	0.58923	0.0278154
RCL1	0.59106	0.0478019
HEATR3	0.59109	0.00457096
MSTO2P	0.59133	0.0324386
HCP5	0.59153	0.00233186
NMRAL1	0.59504	0.0450278
G6PC3	0.59535	0.00855095
IRF9	0.59661	0.0302417
FANCC	0.59678	0.0171571
FKBP3	0.59727	5.42026e-05
SMURF2	0.59762	0.00018401
TRIM35	0.59803	0.0431008
NOP2	0.5983	0.0455999
C11orf80	0.60014	0.0259126
NOL9	0.60027	0.00294602
SNX19	0.60053	0.0226733
FAM50A	0.60229	0.00259235
PBDC1	0.60263	0.0043397
APBA2	0.60452	0.0462399
BCAP29	0.60512	0.00537155
DNAJC10	0.60585	0.000623973
NAT14	0.60707	0.0467002
TEX261	0.60721	0.000695468
PIP5K1C	0.60823	0.0359219
ADAT1	0.60883	0.0106974
GRN	0.61024	0.0136054
FUCA2	0.61321	0.00116328
ZNF747	0.61414	0.028667
TEF	0.61485	0.0377579
CTPS2	0.61522	0.0486776
VPS53	0.61589	0.000597127
ENOSF1	0.6164	0.00425553
POLR2L	0.61995	0.0232784
WDR34	0.6211	0.0102089
FER	0.6237	0.00342464
GPS2	0.62426	0.00828545
COMMD9	0.62433	0.000195573
MON1A	0.62473	0.00599341
ZFYVE21	0.62566	0.00186621
LRRC1	0.62593	0.037684
RALA	0.62739	0.000523022
ZDHHC16	0.628	0.00171399
SV2A	0.62888	0.00320551
DDX31	0.62892	0.0280397
IFT46	0.62912	0.00738589
HSPBP1	0.62922	0.0374828
VRK2	0.63075	0.00813683
L3MBTL2	0.63088	0.00175115
TOMM40L	0.6356	0.00383705
REEP3	0.63735	0.00125537
PRKACA	0.63897	0.0273514
MCOLN2	0.63897	0.0452222
HCN3	0.6434	0.0491546
FAM210B	0.64436	0.00549876
PGAP3	0.64491	0.00524669
ERMAP	0.64557	0.0445919
ZNF226	0.64661	0.0185436
GIPC1	0.64662	0.0169142
PARP4	0.65077	0.0359327
CCDC112	0.65135	0.00824911
ADAMTS6	0.65163	0.031956
PNPT1	0.65204	0.0193299
COQ7	0.65259	0.00333796
DVL3	0.65333	0.000626617
MAK16	0.65477	0.0266751
TCEAL3	0.66299	0.048494
COQ10A	0.66364	0.0430641
C19orf66	0.6672	0.000161793
TMEM199	0.66918	0.00128868
DYNLL1	0.67036	0.00429836
CAPN2	0.67054	0.0288842
TMEM165	0.67082	0.00664434
POLR3C	0.67149	0.0232394
ERC1	0.67263	0.0105349
UACA	0.67715	0.0215343
ATP6V0D1	0.6785	0.00259451
TAS2R8	0.67905	1.5985e-05
FAM69C	0.67905	0.0478822
GABPB2	0.6792	0.00215439
AAED1	0.68012	0.000399805
TIGD6	0.68026	0.0166492
ATPAF2	0.68602	7.85431e-05
ANXA5	0.68693	0.000775075
FNDC3B	0.68708	0.00657254
KDELC1	0.68924	0.0135695
B3GALTL	0.69029	0.0156858
NLN	0.69243	0.0315793
USB1	0.69345	0.0364573
POMT2	0.69416	0.0290521
PLAGL1	0.6953	0.0367293
SETD4	0.6957	0.000202446
CAMSAP2	0.696	0.0361689
TRIM44	0.69606	0.00886842
LTV1	0.69671	0.0369455
TRMT6	0.69711	0.0140688
ZNF778	0.69722	0.0251187
S100A11	0.69781	0.00609389
PEA15	0.7003	0.0376963
AP4M1	0.7025	0.0085556
ARHGEF37	0.70421	0.0491139
SCFD2	0.70831	0.0165877
C11orf49	0.70982	0.0445151
IFI35	0.71052	0.00598104
N6AMT2	0.711	0.0460966
MCAT	0.71128	0.0209087
PEX10	0.71158	0.0152943
SLC38A6	0.71221	0.0167724
FAM173B	0.71322	0.0254806
ZFP62	0.71363	0.0395019
CTSZ	0.71457	0.00665516
MBNL3	0.72071	0.0235973
PTPN9	0.72119	0.0378185
MSANTD3	0.7212	6.03264e-05
ANKRD42	0.72456	0.0222698
ENG	0.72588	0.0492931
MAP4K3	0.72736	0.00158097
C11orf74	0.72741	0.00484467
AAGAB	0.72806	0.000334538
MTG1	0.7282	0.0280397
HNRNPM	0.72983	0.00528747
CAMK1	0.73202	0.000588714
INTS9	0.73333	0.0137165
PHACTR2	0.73383	0.00117121
INO80	0.73463	0.000781227
MREG	0.73475	0.000603568
FAM206A	0.73652	0.000495151
IL2RB	0.73711	0.00104296
TNFRSF10A	0.73921	0.000608476
SEMA4F	0.74162	0.00344318
RUFY3	0.74163	9.78816e-05
ACTN1	0.74302	0.0256002
ZNF37BP	0.74352	0.038756
[truncated: 604 more rows]

## Sheet: Table S3
Table S3. List of 824 genes identified as Treg-specific CBP/p300 bromodomain-dependent geneset (P adjusted value <0.05). Data from 5 donors. See heatmap in Fig. 1E.
Gene	log2FC	AdjPvalue
ALPK2	-5.33903	0.000154753
ENTPD1	-5.01133	2.04132e-07
Ig_kappa	-4.72843	0.000300726
CCR8	-4.44853	0.0163023
SGIP1	-4.05551	0.00170832
CNR2	-3.96365	0.0251749
SMPD3	-3.89455	0.00516949
KLF2	-3.85466	0.000433126
CAMK2N1	-3.69336	0.000158337
CD24	-3.63319	5.49511e-06
XCL2	-3.58877	0.00589599
C5AR2	-3.56687	0.001232
NR5A2	-3.4462	7.19399e-05
B3GNT7	-3.22784	0.013762
UMODL1	-3.22784	0.00931042
GTSF1L	-3.21327	0.0123381
AMZ1	-3.19839	0.00022896
DRAXIN	-3.12646	0.0361997
ILDR1	-3.10207	0.00212941
CCR2	-3.06853	0.0224106
FUT7	-3.05023	0.00638188
DNAJC5B	-2.99087	0.0184153
TPSB2	-2.9342	0.020468
CXCR2	-2.90591	0.00402607
C2orf78	-2.85936	0.0153216
C20orf195	-2.79659	0.0267795
CXCR7	-2.76429	2.7271e-06
NOXO1	-2.74094	0.0204587
SNED1	-2.73739	0.0222267
MGAT5B	-2.72094	0.0204063
ISM1	-2.70636	0.0311456
XCL1	-2.70418	0.0227539
DMGDH	-2.69839	0.032377
FGFBP2	-2.69501	0.00120305
CLDN5	-2.67807	0.00609389
LHX1	-2.67117	0.0177343
HLA-DRB6	-2.66118	0.0490669
MGAT3	-2.64107	0.00229563
OR56B1	-2.6392	0.00191542
FCER2	-2.63563	0.00685764
ADORA2A	-2.62695	0.000493496
BFSP2	-2.62646	0.00576118
ZACN	-2.62646	0.0054706
CD160	-2.61343	0.00889708
ZNF541	-2.61092	0.0394015
CRYAB	-2.60207	0.0452722
CCDC42B	-2.56937	0.0494533
LHX5	-2.56687	0.00186621
PGLYRP3	-2.56687	0.00212941
UNC5C	-2.56687	0.015207
ECEL1	-2.55962	0.0395109
C9orf139	-2.54632	0.0235296
EPR-1	-2.51711	0.0267795
JN120857	-2.43536	0.0147014
TJP1	-2.42811	0.00232796
DIO2	-2.40591	0.0258147
GSG1L	-2.40591	0.00517905
JSRP1	-2.40591	0.0245102
LRRC10B	-2.40591	0.0408697
KCNA6	-2.382	0.000575121
SH2D5	-2.35936	0.0105349
HS3ST3B1	-2.3525	0.00175115
FXYD2	-2.35203	0.00419301
OSBP2	-2.35039	0.0189258
ADRA2B	-2.34507	0.0178822
CPAMD8	-2.34314	0.0488272
SDCBP2	-2.32561	0.000870183
ZAN	-2.30959	0.0481339
COL9A3	-2.27439	0.0479522
FGF14	-2.27439	0.00399474
FXYD1	-2.27439	0.0496559
MAFA	-2.27439	0.0269041
TTC34	-2.27439	0.00832527
CXCR3	-2.24789	0.00651473
LAIR2	-2.23237	0.0152932
BATF3	-2.21911	0.012947
HECW2	-2.20645	0.00454272
BMP7	-2.19839	0.0494322
KLF15	-2.19839	0.0193717
CILP2	-2.1895	0.0181369
RASGRP2	-2.18669	0.000259552
REG4	-2.1422	0.000493496
DDC	-2.1283	0.0236423
HORMAD2	-2.11343	0.024489
TBX1	-2.11343	0.000934864
ASXL3	-2.06687	3.25227e-05
CPA3	-2.06687	0.0135543
MVB12B	-2.06687	0.000355714
TNFRSF13B	-2.06687	0.000399603
ZSCAN10	-2.06687	0.0449233
KIT	-2.0536	0.0484614
ATP1A4	-2.05066	0.0475316
TTLL9	-2.01711	0.0167642
WDR49	-2.01711	0.0487065
RFX8	-1.9995	0.0207623
ICOSLG	-1.97527	0.000195385
C12orf39	-1.96365	0.0147014
LAMA2	-1.95752	0.0288842
NCALD	-1.92547	0.0123828
SELL	-1.92371	0.000958309
RAMP1	-1.92078	0.0328365
OR1F2P	-1.91445	0.0469039
COL16A1	-1.90591	0.0101858
FCER1A	-1.90591	0.0271634
LHX4	-1.90591	0.0432167
ARHGAP39	-1.89267	0.0160513
C3	-1.88559	0.0478568
ZC3H12D	-1.86233	0.000837846
HS3ST3A1	-1.85539	0.0396462
KLHL31	-1.83788	0.0441347
MT2A	-1.8126	6.3e-05
PIWIL2	-1.80959	0.0465144
CPA5	-1.7915	0.0139888
BHLHE22	-1.77439	0.0179196
CPZ	-1.77439	0.00993695
NXNL2	-1.77439	0.00611451
WNT10A	-1.72849	0.0057743
NTNG2	-1.72571	0.0137514
TMED6	-1.72094	0.0340524
ZBTB46	-1.71327	0.00550779
EFCAB4A	-1.71191	0.000580859
CCDC36	-1.69839	0.00503959
SOX1	-1.69839	0.00333933
TRPC5OS	-1.69839	0.0230805
KRT7	-1.6925	0.0489586
DEPTOR	-1.68685	0.032808
HHEX	-1.6673	0.00541453
HLA-DOA	-1.66583	0.0148485
HELZ2	-1.6525	0.0242489
MYRF	-1.6504	0.0165477
SRGAP3	-1.64907	0.0184158
SPINK2	-1.63905	0.0287739
AK5	-1.61343	0.00288801
C17orf99	-1.61343	0.00168404
GLP1R	-1.61343	0.0395276
MASP2	-1.61343	0.0463695
NKX6-1	-1.61343	0.000119534
ONECUT1	-1.61343	0.000779942
PRODH	-1.61343	0.0459201
SIM2	-1.61343	0.0497695
TEKT3	-1.61343	0.0198764
TMEM89	-1.61343	0.0491139
BID	-1.61326	0.0108819
CTSW	-1.60755	0.000141464
CHRNA6	-1.56778	0.0022578
DCLK3	-1.56687	0.0327969
EPSTI1	-1.56678	0.0157524
MEX3B	-1.52399	0.0161865
PIM2	-1.50422	0.000516007
SPON1	-1.49547	0.0191354
GJC2	-1.48864	0.0353217
DFNB31	-1.4823	0.0198776
MYO5C	-1.4757	0.00176056
CD84	-1.45937	0.000564719
GPR55	-1.44412	0.000581021
ADCY5	-1.40591	0.0165477
BTBD18	-1.40591	0.0221299
KIF12	-1.40591	2.97583e-05
KLK11	-1.40591	0.0431008
MDFI	-1.40591	0.00843966
MLPH	-1.40591	0.000198049
PCDH17	-1.40591	0.00272378
TRNA_Gly	-1.40591	0.030483
AV1S4A1N1T	-1.39912	5.62731e-06
SPON2	-1.38863	0.0277105
SPNS3	-1.38723	0.0105349
AV25S1	-1.37218	0.000387134
PITPNM2	-1.36403	0.00813683
AIM1	-1.35101	8.65408e-07
RNF125	-1.3495	0.000137609
CASS4	-1.34933	0.0232942
SLC25A53	-1.31519	0.00319988
TTC22	-1.30714	0.0217925
RGPD1	-1.30644	0.0113461
NOD2	-1.29882	0.0163023
MAL	-1.29719	0.00337774
HSD17B14	-1.29221	0.0139534
RAB43	-1.2888	0.00782809
NEURL1B	-1.27527	0.0397765
COL26A1	-1.27439	0.0498411
PLCG2	-1.27346	0.000198049
PDE6G	-1.2722	0.0265299
EVI2B	-1.2501	0.00606303
GBP5	-1.24915	0.00173094
XKRX	-1.24885	0.0410454
FGD6	-1.24738	0.00188596
IL4I1	-1.23519	0.0454642
LSP1	-1.22576	0.00791978
ACTG1P4	-1.22033	0.0331825
DLL1	-1.21738	0.0483644
EVL	-1.19666	0.0017412
FLT4	-1.19552	0.0349661
CHST2	-1.19528	0.00339904
CD28	-1.18887	0.0011301
PIK3R5	-1.18129	2.48487e-05
AHCYL2	-1.16457	0.0274256
IL16	-1.14961	0.00598058
RASA3	-1.13748	0.00116973
GPR18	-1.137	0.0489586
SESN3	-1.13578	0.00599859
ADCK3	-1.13414	0.000156425
LGALS9	-1.13399	0.0253833
LAT	-1.1173	7.91815e-05
TIAM1	-1.1146	3.11365e-05
ADAM33	-1.11343	0.0238582
ADCYAP1	-1.11343	0.0402487
DNAJC5G	-1.11343	0.018159
HYAL4	-1.11343	0.038171
KRT19	-1.11343	0.0421328
OR4F15	-1.11343	0.0309077
SPDYC	-1.11343	0.00693594
TUBA3C	-1.11343	0.00917523
ZFP57	-1.11343	0.00390842
MTSS1	-1.10306	0.0397039
MDS2	-1.10231	0.00975452
LYSMD2	-1.10192	1.24621e-05
CT45A2	-1.09517	0.0126259
JMY	-1.09224	0.00747485
PMS2L14	-1.08456	0.00539691
HCG4	-1.0722	0.0241715
ARHGAP9	-1.07099	4.81084e-06
X58749	-1.06726	0.0262625
HDAC4	-1.06042	0.0203246
WHAMM	-1.05579	0.00990541
RTN4IP1	-1.0527	0.00015427
C2CD2	-1.04819	0.000556265
RORA	-1.04594	0.00544159
LAX1	-1.0424	0.000355714
BATF	-1.04042	0.000870183
RFK	-1.03897	0.010713
ERP27	-1.03728	0.0101118
TMEM120A	-1.03666	0.0394443
PYHIN1	-1.03228	0.0402691
SCARNA6	-1.0194	0.00738589
HLA-DMA	-1.00856	0.000693468
ASPRV1	-1.0049	0.0136054
TIGD3	-1.0028	0.0393733
PDE4DIP	-1.00181	0.000241434
UBASH3A	-0.99058	0.037443
DBP	-0.97649	0.0196757
CMIP	-0.9576	0.0173062
GLCCI1	-0.95652	0.00874265
STAC3	-0.94806	0.0267846
TNIK	-0.94552	2.25827e-05
TMEM38B	-0.94013	0.00599859
ANXA2R	-0.93165	0.0342218
PGM2L1	-0.93052	0.000330274
INSIG1	-0.91905	0.00391874
VPS8	-0.91331	0.00564113
AKNAD1	-0.90591	0.0212537
C10orf107	-0.90591	0.0254806
CES5A	-0.90591	0.000286554
GNRHR	-0.90591	0.00904903
POU3F3	-0.90591	0.0426559
SPZ1	-0.90591	0.0118779
SUPT20HL2	-0.90591	0.000974492
S100A4	-0.90323	0.0192019
SLA	-0.89816	0.00823381
SCARNA22	-0.89731	0.0360781
LRP5L	-0.89219	0.00480878
2018-09-09	-0.88476	0.00136217
ANKEF1	-0.87985	0.0115854
PBXIP1	-0.87255	0.0459201
LMCD1	-0.87073	0.0100054
SNX20	-0.86597	0.0015146
RGS12	-0.86459	0.00077264
CDKN1B	-0.8643	0.00143424
PHLPP1	-0.86121	0.0121973
CD8B	-0.85679	0.0173797
CBX7	-0.85663	0.000456225
NMNAT3	-0.85655	0.0194726
FCHSD2	-0.85636	3.0721e-05
FAM159A	-0.85513	0.0419229
S1PR4	-0.85389	0.0372439
PMS2L2	-0.84733	0.000608122
ST3GAL5	-0.84513	0.0280611
RAB8B	-0.83594	0.032923
TNRC18	-0.83055	0.000695468
GPR113	-0.81401	0.0345042
STMN3	-0.80123	0.0390611
HCST	-0.79481	0.0137514
ITGAL	-0.79115	0.0133703
IL10RA	-0.78901	0.011681
SASH3	-0.78861	0.000809214
hADV38S2	-0.78663	0.0165877
ZNF280C	-0.78191	3.3043e-05
CNNM2	-0.77289	0.0240835
MCEE	-0.76816	0.0152397
ITGB2	-0.76369	0.00242508
ARRB1	-0.76234	0.0239029
CBX8	-0.76134	0.0255381
RRN3P1	-0.7521	0.0128926
GBP2	-0.75208	0.00283339
ZNF101	-0.74698	0.00202577
HIP1	-0.74513	0.0484457
IL21R	-0.73623	0.0257714
SNRK	-0.72996	0.000121681
ARHGAP26	-0.72796	0.0116174
HBP1	-0.71056	0.0395446
WDR74	-0.7072	0.00731164
GCNT1	-0.70718	0.0243015
TOM1	-0.70097	0.0148199
TVP23C-CDRT4	-0.6899	0.0219203
MBP	-0.67933	0.0267629
TRA	-0.67611	0.00172016
ITGA4	-0.66632	0.0215343
PNRC1	-0.6605	0.0424877
DOCK10	-0.65718	0.000588714
RHOH	-0.65628	0.0442528
CD96	-0.65519	0.0446459
ZNRF2	-0.65488	0.0026392
MXD3	-0.65099	0.0126155
PRKAG2	-0.65013	0.00230688
IKZF1	-0.64876	0.0190072
HIST1H2AD	-0.6454	0.0325603
SH3TC1	-0.64285	0.0278154
SLC12A6	-0.64111	0.029908
RFX5	-0.635	0.000475862
ISOC2	-0.6329	0.0182391
TBC1D4	-0.63271	0.0109144
PRKCB	-0.63055	0.000413404
RCOR1	-0.62888	0.0226326
LPXN	-0.62847	0.00258219
HMGCS1	-0.6195	0.00945163
AV8S2	-0.61875	0.00320945
ITM2C	-0.61757	0.00480535
PC	-0.61553	0.0212745
DNAJB1	-0.61535	0.0047762
A1CF	-0.61343	0.0282568
ACAN	-0.61343	0.0386366
CCL19	-0.61343	0.0481757
CHRM2	-0.61343	0.0494322
CTNND2	-0.61343	0.00937208
FAM25C	-0.61343	0.0280697
IQCJ	-0.61343	0.000381505
MRO	-0.61343	0.0494322
OTOG	-0.61343	0.0121091
MSL2	-0.61205	0.00540837
ARNTL	-0.61112	0.00471641
FAM117B	-0.6021	0.0117762
SLC9A3R1	-0.6018	0.0030895
MAD1L1	-0.60061	0.00232796
OCEL1	-0.59715	0.0485087
RUNX3	-0.59659	0.00345644
RNASEH2B	-0.59291	0.00084955
ITK	-0.59248	0.0079012
PPP1R12B	-0.5913	0.00622613
CLEC2D	-0.59037	0.0122331
CNIH	-0.58813	0.047426
DEAF1	-0.58344	0.00430181
PPP1R9B	-0.58073	0.00289162
AAK1	-0.57929	0.0343425
TAPT1	-0.57524	0.000971664
CSNK1G3	-0.57237	0.02845
STK38	-0.57207	0.0341072
WHAMMP1	-0.57044	0.0110868
LCORL	-0.56776	0.0263533
RTKN2	-0.56578	0.0293474
CBX4	-0.56488	0.00294602
RYK	-0.56125	0.00128868
PAK2	-0.55829	0.00247219
PRKD2	-0.55796	0.0138228
CMTM8	-0.55583	0.0370216
JARID2	-0.55523	0.00312954
CEP120	-0.55208	0.0150563
LAPTM4A	-0.5498	0.0443534
HSH2D	-0.54433	0.0114892
TERC	-0.5434	0.0472531
FDX1	-0.54106	0.045565
UNKL	-0.53989	0.0205861
GNB5	-0.53807	0.00409485
VIMP	-0.53728	0.0294056
ZNF581	-0.5348	0.0105349
HECA	-0.5347	0.046997
SCARNA12	-0.53023	0.00488836
PSMB10	-0.52582	0.0137165
RPS21	-0.52526	0.00296375
BTG1	-0.52405	0.0421598
HOOK1	-0.52097	0.00311336
GRK6	-0.5205	0.00163092
BIN1	-0.51803	0.0280168
PCSK7	-0.50919	0.00805246
HEIH	-0.50804	0.0196196
SYNGR2	-0.50772	0.00684869
CARHSP1	-0.50618	0.00560338
PGPEP1	-0.50404	0.0491744
CCM2	-0.50333	0.038756
RPTOR	-0.50162	0.0439168
CSK	-0.50101	0.0192902
ASF1A	-0.49863	0.00518257
Metazoa_SRP	-0.49757	0.00813683
APOL3	-0.49523	0.0240432
DENND1C	-0.4917	0.00519683
SACM1L	-0.48872	0.0118436
ICAM3	-0.48851	0.0102767
BACH1	-0.48639	0.0156858
FOXN3	-0.484	0.00721051
H2AFJ	-0.48352	0.0167264
QRSL1	-0.48007	0.00410166
SLC25A42	-0.47753	0.0416265
CDCA7L	-0.47599	0.0139688
DENND2D	-0.4758	0.0415861
TRMT2A	-0.46821	0.0250834
OXNAD1	-0.46704	0.039778
2018-09-06	-0.46556	0.0299926
UBE2R2	-0.46425	0.0148205
TBL1XR1	-0.46342	0.0334094
TMEM167A	-0.46238	0.0449902
LHPP	-0.46125	0.0479324
ZC3H12A	-0.45772	0.0347704
LAPTM5	-0.45611	0.0210634
PEX16	-0.45516	0.0168559
TBC1D23	-0.45081	0.0410592
BTD	-0.43685	0.0424263
GPSM2	-0.43583	0.0251749
EEF2	-0.43555	0.0260541
DGKZ	-0.43514	0.0273604
CDC42SE2	-0.42406	0.0312298
WDTC1	-0.42315	0.0293679
CEP128	-0.42195	0.0374888
ZBTB44	-0.41772	0.04499
WDR48	-0.41552	0.0216254
PAPD5	-0.41483	0.0473229
SERP1	-0.41433	0.0317342
WDR7	-0.41309	0.0477292
LIMD1	-0.40993	0.0265497
FDFT1	-0.40975	0.0146453
AIP	-0.40942	0.0365408
PPP2R4	-0.40886	0.0158171
TRAC	-0.40826	0.0128028
ERGIC1	-0.40774	0.0481177
STAG3L2	-0.40629	0.0186201
LDHB	-0.40057	0.0389228
RELB	-0.39987	0.0131871
ULK3	-0.39955	0.00715664
ASXL1	-0.399	0.0017552
NR3C1	-0.39661	0.0308928
PTPRC	-0.39385	0.00602478
ETFB	-0.39366	0.0260532
ATP6V1G1	-0.39122	0.0150629
RPL18A	-0.38992	0.00704924
ANAPC16	-0.38895	0.00945163
RAB24	-0.38831	0.0163588
CLINT1	-0.38756	0.00205175
NCK2	-0.38543	0.0327822
BRWD1	-0.3806	0.0488008
CREBL2	-0.38007	0.0137079
RPS2	-0.3786	0.0171001
PABPC4	-0.37712	0.0216254
MORC3	-0.37704	0.0407693
RPS5	-0.372	0.0148485
FAU	-0.36758	0.0151197
ABHD3	-0.36729	0.0283415
RILPL2	-0.36695	0.0407515
ABCC1	-0.36616	0.0256077
RPL3	-0.36206	0.0326486
TCF3	-0.35807	0.0395447
GCLC	-0.35428	0.0192084
ALDH9A1	-0.34319	0.0160964
RPS9	-0.34151	0.0349311
2018-09-01	-0.33891	0.04499
EIF3K	-0.3373	0.0302417
LPIN1	-0.33585	0.045169
MYSM1	-0.33385	0.0479522
RAPGEF6	-0.32406	0.0182391
STAT5A	-0.32326	0.0431008
TRIM4	-0.318	0.02723
GSTO1	-0.31085	0.049036
SLC10A7	-0.29375	0.037684
RPL7A	-0.27854	0.0452722
EIF2S3	-0.27292	0.0483136
SYS1	-0.27069	0.0320629
CNST	-0.24588	0.0409416
FBXW2	0.23412	0.0412802
PARG	0.25896	0.045169
AP3M1	0.2641	0.00657254
IKBKAP	0.26636	0.0198304
MRPS10	0.26754	0.048816
PRPF18	0.27126	0.0488485
VPS25	0.27597	0.0313972
THOC2	0.28613	0.0137165
COPS7B	0.28788	0.0386153
EXT2	0.29532	0.03154
SS18	0.30366	0.0478568
PPP1R8	0.30844	0.0240602
STK24	0.30872	0.0171614
BMS1	0.30933	0.0116707
CAP1	0.31156	0.0258478
NUPL2	0.31202	0.0442033
ECD	0.31602	0.0153864
POLK	0.31616	0.0113505
DDX42	0.32224	0.00414364
DNAJC8	0.32419	0.0479522
C10orf76	0.32684	0.0396796
CEP89	0.32828	0.016104
BTBD10	0.33121	0.0280611
RANBP2	0.33197	0.0243015
PWP1	0.33468	0.00701532
KXD1	0.33716	0.0272253
EIF2S1	0.34466	0.0494876
UBE2L3	0.34483	0.0338074
TPM3	0.34582	0.0243015
OSGEP	0.34602	0.0359219
MOCS2	0.34661	0.0352581
IAH1	0.3486	0.0154748
HAUS1	0.35017	0.0115854
TRMT11	0.35173	0.0443534
UBE2E1	0.35389	0.0280397
SMURF1	0.35427	0.0342804
MAP4	0.35546	0.00900249
RPL23AP82	0.3564	0.0491546
VWA8	0.3592	0.0095599
ADO	0.35987	0.027543
NOMO1	0.35995	0.0184939
EIF2B4	0.36185	0.0220596
MEF2A	0.36324	0.0361997
TRIP4	0.36352	0.0421328
DDX1	0.36457	0.0325603
BAZ1B	0.36778	0.0247552
LRRC57	0.36917	0.0176247
IWS1	0.36919	0.0442528
CCDC138	0.37103	0.0454965
FIP1L1	0.37139	0.0157524
OCIAD2	0.374	0.0112488
ARMCX2	0.3771	0.0450278
TOR3A	0.37806	0.0163358
KATNAL1	0.3824	0.0206092
AHSA2	0.38444	0.0496291
CYB5R3	0.3857	0.0296704
RPF1	0.38856	0.0360781
TOR1A	0.39065	0.0174915
EML4	0.39298	0.00242508
EIF2AK4	0.40038	0.00981945
XRCC4	0.40264	0.0395446
VPS29	0.40328	0.00510111
TMEM237	0.40436	0.0431673
BBS7	0.40672	0.00669946
GNG5	0.41013	0.04499
ZC3H8	0.41251	0.0151489
HMGB3	0.41523	0.0232942
ZNF398	0.41537	0.048969
OGFOD1	0.41698	0.0147014
ANKMY2	0.42158	0.00256174
CAMSAP1	0.42176	0.0107961
EXOSC10	0.42193	0.012947
KLC1	0.42406	0.00888223
MORC4	0.42707	0.0159221
TTC19	0.43348	0.00171399
SIPA1L1	0.44246	0.0362335
KIF1C	0.44281	0.0493272
RAP1B	0.44359	0.00283339
LITAF	0.44424	0.0191495
CD63	0.44459	0.029908
WRN	0.44896	0.0439056
RP9	0.44903	0.0333074
CCBL2	0.4499	0.0395446
PACSIN2	0.4536	0.00137082
HUS1	0.4615	0.0258188
CSTF3	0.46508	0.0150297
PIP4K2C	0.4711	0.0254819
AIG1	0.47253	0.0341072
SEPW1	0.47255	0.0229855
AGFG1	0.47317	0.00175998
ARL3	0.47361	0.00289729
PHF20L1	0.47576	0.0113614
E2F4	0.47916	0.0290224
C12orf4	0.48077	0.0255381
RAD50	0.48228	0.0104528
ALS2	0.48265	0.0392737
SNRPD3	0.48346	0.0280397
MYO19	0.48384	0.0263989
ACER3	0.48897	0.0254819
TBCE	0.49478	0.000834913
TM9SF1	0.49561	0.00985251
PCYT1A	0.49693	0.0230683
CD40	0.49735	0.046028
NSMCE4A	0.50353	0.025097
MAGOH	0.50564	0.0252434
NSRP1	0.5062	0.0154487
CTSB	0.5113	0.025565
MPZL1	0.51165	0.0111454
PFDN1	0.51258	0.00242508
FADS1	0.5165	0.046028
HN1L	0.51725	0.0293474
GTF2H2	0.52036	0.00781833
NCLN	0.5236	0.0190493
ANKRD52	0.52376	0.0423267
PTPLAD1	0.52386	0.00991331
DAG1	0.52903	0.0421328
MYH10	0.53206	0.000916267
ZNF584	0.53523	0.0364573
FASTKD1	0.53875	0.00183378
KLF3	0.53878	0.0448753
ZSWIM7	0.54414	0.0223655
ARL13B	0.54465	0.0314612
DYNLRB1	0.55019	0.00604784
SERPINH1	0.55167	0.0172936
GOLGA8B	0.55319	0.0492025
ICMT	0.55756	0.0491323
PTGR2	0.57573	0.0363515
MGC72080	0.5834	0.032465
TSTD2	0.58529	0.0337962
DUSP14	0.58918	0.02723
RCL1	0.59106	0.0478019
HEATR3	0.59109	0.00457096
NOP2	0.5983	0.0455999
NAT14	0.60707	0.0467002
ENOSF1	0.6164	0.00425553
ZFYVE21	0.62566	0.00186621
HSPBP1	0.62922	0.0374828
MCOLN2	0.63897	0.0452222
PNPT1	0.65204	0.0193299
MAK16	0.65477	0.0266751
UACA	0.67715	0.0215343
FAM69C	0.67905	0.0478822
AAED1	0.68012	0.000399805
ANXA5	0.68693	0.000775075
KDELC1	0.68924	0.0135695
NLN	0.69243	0.0315793
S100A11	0.69781	0.00609389
PEA15	0.7003	0.0376963
ARHGEF37	0.70421	0.0491139
ENG	0.72588	0.0492931
AAGAB	0.72806	0.000334538
SUMO1P3	0.74777	0.0234879
NXF2	0.74999	0.0461704
RRP1	0.77126	0.0479324
CHD7	0.78949	0.000306229
CYFIP1	0.79058	0.0287826
ARMCX4	0.79261	0.0279464
2018-09-08	0.7937	0.0243015
FER1L4	0.81463	0.0419205
RGPD5	0.82174	0.0241244
MAP4K5	0.8246	0.0082725
ZNF48	0.83459	0.00316445
ETV6	0.83839	0.0203657
RHBDF2	0.84844	0.0207021
ZNF215	0.85838	0.0417023
DHRS11	0.86588	0.0107806
NPL	0.8718	0.0203919
SELM	0.88202	0.0497578
CXADRP2	0.88657	0.00828545
NR0B2	0.88657	0.00412628
BMP1	0.8911	0.00721051
ECE1	0.90783	0.00231808
MAP7	0.91918	0.00872656
ZNF771	0.91943	0.0168559
MLLT11	0.9447	0.000639211
MFI2	0.94697	0.00625397
ILDR2	0.94791	0.0496291
SYT11	0.95838	0.000316466
FAM111B	1.00708	0.00833942
STARD5	1.01072	0.0110423
SETBP1	1.0162	0.0253266
NGS-17	1.01733	0.0158308
TRIM6	1.02699	0.0226213
CTIF	1.03655	0.0224556
NRBP2	1.04599	0.00391874
AGPHD1	1.05756	0.0345907
USP9Y	1.07935	0.00394234
RSPH3	1.11648	0.0359025
SMIM10	1.12396	0.0211855
FAM201A	1.14227	0.0260532
SLC2A6	1.1537	0.0221299
GNG12	1.16485	0.0432267
SOGA3	1.17806	0.0126313
C11orf70	1.17905	0.000195385
FOXI3	1.17905	0.0178424
PRDM6	1.17905	0.00863536
RASAL2	1.17905	0.0299207
C9orf3	1.1954	0.00476224
CCDC176	1.20494	0.00793842
RBFOX2	1.22441	0.0243015
TRGV3	1.26128	0.0226733
PTRF	1.2657	0.00485419
GOLM1	1.29458	0.0407693
IQCH	1.30078	0.0102089
KCTD11	1.30763	0.00465129
CHST10	1.30943	0.0255381
RPS6KL1	1.32226	0.0449376
FAM188B	1.33197	0.000289955
C10orf10	1.37697	0.0174725
MAATS1	1.38154	0.0345907
TUBB6	1.39083	0.000383058
CLIC3	1.39511	0.0262114
REP15	1.39553	0.0443534
PRKCDBP	1.42152	0.0027688
TGFB1I1	1.45624	0.0454642
CCNI2	1.48332	0.024504
CRMP1	1.49027	0.0356515
LCA5	1.52428	0.000416055
MB21D2	1.52916	0.00586234
ANKRD20A5P	1.54558	0.0148759
SGK1	1.54734	0.012155
SYP	1.54894	0.00116973
PCYT1B	1.55777	0.0199411
RP9P	1.56326	1.6194e-05
MARVELD1	1.56627	0.00178615
GAP43	1.57918	0.0073563
PNMA2	1.58688	0.0326517
VASH1	1.59473	0.013054
DNAJC6	1.60227	0.0117272
TMEM246	1.61629	0.00880692
WLS	1.61629	0.0295328
LTF	1.61771	0.0322806
GRIP1	1.62397	0.0408344
ANKRD7	1.62928	0.0362889
RHOV	1.646	0.00637007
CDK18	1.65076	0.00356096
SORT1	1.65676	0.000440077
OR52H1	1.67905	0.0480805
TAGLN3	1.68257	0.00173094
CT45A5	1.68991	1.03071e-06
KLHDC9	1.69936	0.0271715
GPR161	1.71327	0.0083164
PTGR1	1.72426	0.00474401
MARVELD2	1.72882	0.0278154
SNX7	1.73679	0.0192084
EPDR1	1.73906	0.00499702
C17orf64	1.76401	0.0252434
LIPH	1.76401	0.0449902
PPP1R36	1.78681	0.0156824
UNC13B	1.78928	8.01278e-05
PCDHB5	1.79025	0.0219203
TENC1	1.80646	0.00305052
SRSF12	1.82175	0.014656
CCNJL	1.84002	0.0413775
SLFN14	1.84002	0.038171
SAGE1	1.85402	0.00103245
CAMK1G	1.88657	0.0288842
FAM135B	1.91602	0.0408415
CD1E	1.95121	0.00100963
PAPOLB	1.95121	0.0278154
TMPRSS4	1.95121	0.00847211
ST5	1.95532	0.000475862
ENC1	1.96553	0.00675638
ZNF608	1.96651	0.00874265
CAMK2B	1.96917	0.0442445
GNG11	1.97153	0.0487142
GPR173	1.97153	0.0158294
MARVELD3	1.97153	0.0378244
SHROOM4	1.97153	0.0211097
SPRED1	1.98254	0.00598916
LRRC6	1.9913	0.00100734
TANC1	1.9976	0.000211944
ATP9A	2.0313	0.000161947
HTRA1	2.04754	0.0168559
MAFB	2.04754	0.0452416
MYOM3	2.04754	0.000226268
CATSPER1	2.08273	0.0225752
TRPC3	2.08273	0.0118389
FBXO16	2.08445	0.041945
IQCD	2.10804	0.0094636
CD276	2.11706	0.0167753
GFRA2	2.14205	0.0378244
TMEM37	2.15529	0.0401991
ALB	2.17905	0.0441888
TPTE2P1	2.17905	0.0328365
TPTE2P6	2.19393	0.0453161
BANK1	2.20125	0.0320629
CYTL1	2.20125	0.0113528
MYLPF	2.2085	0.0323023
TBC1D9	2.2085	0.0468435
CHRM4	2.22748	0.0288842
FXYD6	2.23719	0.0201462
GNMT	2.24025	0.0113029
C12orf68	2.25325	0.0212537
HOXD1	2.25505	0.0246544
TLL2	2.26401	0.028331
EPHA2	2.30302	0.00770455
X97876	2.3152	0.0361997
ITPRIPL2	2.32137	0.000483769
DOCK1	2.34302	0.000117999
ALPK3	2.36162	0.0278483
IL9	2.37521	0.0393016
ITGA2	2.38511	4.88105e-05
CHST1	2.39775	0.00295612
TMEM144	2.41495	0.00844634
KIF26B	2.42125	0.0479324
MB	2.4303	0.0357654
OPHN1	2.4303	0.0304633
SLC26A4	2.4303	0.0241244
TCEAL5	2.4519	0.0127706
SPRY2	2.48804	0.0229851
HOXB13	2.50098	0.0107806
MOB3B	2.50266	0.00367241
PRRX1	2.5415	0.0104622
ARHGEF40	2.54399	0.0282386
SPP1	2.54659	0.0280697
SH3RF1	2.57781	0.00283904
IL17RD	2.59204	0.000374963
BAALC	2.59409	0.00294602
CA12	2.64047	0.0294298
NACAD	2.64704	0.0331456
EFR3B	2.65858	0.0164913
NYAP1	2.66284	0.00436703
RAI14	2.69024	0.00158062
MAP6	2.7085	0.0211097
CDO1	2.72748	0.0203246
SALL4	2.74369	0.0415352
FN1	2.75152	0.0111351
CLEC18C	2.76159	0.0291267
PPIC	2.77725	0.000236726
GJA1	2.81556	0.0224556
FAM151B	2.82175	0.000330274
C15orf48	2.82381	0.0172311
PRR15	2.82544	0.00246307
FRAS1	2.84002	0.00219159
KLHL41	2.84255	0.0328507
SPATA32	2.87521	0.000433135
LAMB1	2.90877	0.000718614
GSTT2	2.9303	0.00333388
CR627148	3.05457	0.00113104
EPHB2	3.12928	0.00339904
HOXA7	3.2085	9.21219e-05
CAV2	3.35389	0.00240007
C1orf180	3.41602	0.000442112
CH25H	3.47653	0.000717665
PTPN20A	3.54428	0.0408697
MMP2	3.68642	1.0275e-05
MRAP2	3.95121	0.000294841
IL13RA1	4.00338	0.00465777
FCRL4	6.05119	1.40405e-08
SERF2-C15ORF63	7.12096	0.00850625

## Sheet: Table S4
Table S4. List of 959 Treg-specific genes identified by H3K27Ac ChIPseq that are directly acetylated by CBP/p300 during Treg differentiation. Data from 3 donors. See diagram in Fig. 2B (red track).
Gene	Active Region	Start	End	Treg cells: GNE-781 vs. DMSO Log2Ratio
CDK19	51766	110967858	110968535	-2.201
GNPTAB	14184	102176200	102177180	-2.136
CLEC17A	29583	14714362	14714958	-1.956
C2CD2	38852	43342008	43342917	-1.932
UBASH3B	11949	122570455	122573035	-1.918
ZKSCAN1	54558	99619276	99621529	-1.901
SLIT3	48893	168108434	168109228	-1.866
VPS8	44269	184528109	184529488	-1.861
LOC100505729	44269	184528109	184529488	-1.861
SNX33	19852	75944412	75944862	-1.791
CHRNB3	56689	42564228	42564627	-1.78
MT2A	22295	56648712	56649186	-1.766
UGP2	32783	64082285	64083947	-1.76
LRP5	10813	68108684	68109532	-1.752
C20orf4	37197	34818386	34819178	-1.73
EPB41L1	37197	34818386	34819178	-1.73
ST8SIA6	6848	17486328	17487885	-1.724
CYFIP2	48777	156779158	156780956	-1.667
C5orf40	48777	156779158	156780956	-1.667
EEFSEC	43568	128091304	128092614	-1.666
LOC100131510	32103	25603373	25604096	-1.655
HNRNPC	16418	21694567	21694962	-1.64
AHRR	46643	344903	345289	-1.606
EMID2	54685	101033766	101034707	-1.578
STK32C	8977	134045875	134047490	-1.568
RASSF2	36667	4786374	4786632	-1.547
LOC100507183	52044	130454110	130454835	-1.542
C10orf18	6395	5795662	5796234	-1.541
CARD9	60554	139276432	139278240	-1.53
SNAPC4	60554	139276432	139278240	-1.53
9-Sep	26630	75336686	75339081	-1.528
MYO1E	19240	59544447	59545342	-1.527
RPS6KA2	52941	166913464	166914062	-1.519
MIR1913	52941	166913464	166914062	-1.519
NCS1	60240	133005101	133005459	-1.518
DIMT1L	47253	61692090	61693113	-1.516
KIF2A	47253	61692090	61693113	-1.516
MIR1280	43567	128090056	128090853	-1.492
SCRIB	58122	144879255	144880129	-1.482
LOC642574	58122	144879255	144880129	-1.482
CAPN5	11106	76793097	76795260	-1.481
PDK3	61109	24530631	24531147	-1.468
ANKMY1	36306	241451069	241453469	-1.465
LOC643988	118	1541952	1543349	-1.425
HNRNPA1	13426	54668406	54668846	-1.417
LRRC20	7663	72123732	72124366	-1.408
SHISA5	42180	48518737	48521528	-1.401
TREX1	42180	48518737	48521528	-1.401
LOC494558	58804	72444283	72445314	-1.395
C9orf135	58804	72444283	72445314	-1.395
DMBX1	2394	46987569	46989072	-1.387
TBC1D17	31286	50397373	50397823	-1.382
SOAT2	13340	53496925	53497943	-1.37
IGFBP6	13340	53496925	53497943	-1.37
LOC100506458	55676	157068667	157070245	-1.368
NRARP	60700	140199136	140201806	-1.362
EXD3	60700	140199136	140201806	-1.362
RAB14	59765	123968959	123970843	-1.358
PECR	35573	216948934	216950228	-1.355
NR4A3	59417	102578914	102579391	-1.351
LOC100506501	24643	29122329	29122950	-1.348
SLC2A4RG	38289	62380942	62383018	-1.347
ZBTB46	38289	62380942	62383018	-1.347
ATP6V0A2	15022	124226427	124227433	-1.345
CLUAP1	20858	3558659	3560008	-1.342
ZCCHC24	7976	81147120	81149149	-1.337
LIPC	19215	58776555	58778166	-1.33
PDE9A	38918	44156666	44159596	-1.317
NRL	16571	24550138	24551244	-1.315
CPNE6	16571	24550138	24551244	-1.315
KLHL3	48181	137031240	137032076	-1.312
SLC1A2	9713	35303625	35304820	-1.308
ZC3H14	17757	89064884	89066281	-1.303
MIR2116	19237	59462105	59462781	-1.295
NOG	25707	54679646	54680758	-1.294
HS3ST3B1	24160	14241313	14241704	-1.288
UTP20	14176	101759731	101760061	-1.283
NR4A1	13307	52438921	52440313	-1.28
SHB	58758	37994919	37995645	-1.276
LOC100506862	21833	29128166	29128669	-1.272
FLT4	49251	180050499	180051087	-1.271
TSGA14	55059	130059511	130060142	-1.269
CYP1A1	19758	75020017	75020443	-1.259
MORC3	38734	37681734	37683118	-1.259
SASH3	62044	128903667	128904612	-1.259
ST7OT1	54924	116596229	116596667	-1.255
ST7	54924	116596229	116596667	-1.255
ST7OT4	54924	116596229	116596667	-1.255
ADAMTS14	7679	72500601	72501001	-1.248
TMEM92	25632	48357041	48357485	-1.239
LOC402382	60526	138998235	138998894	-1.239
C9orf69	60526	138998235	138998894	-1.239
LONRF3	61960	118108481	118109627	-1.234
FAM18A	21048	10914617	10915826	-1.233
POM121C	54276	75057338	75058343	-1.23
SMTNL1	9990	57314641	57315821	-1.226
CD8B	33367	87063751	87064244	-1.225
LOC100506022	476	9478754	9479226	-1.224
CA6	436	9001285	9001871	-1.223
CCDC153	11876	119050705	119051099	-1.223
HSF5	25778	56570655	56571256	-1.221
MTMR4	25778	56570655	56571256	-1.221
POLR1A	33331	86295792	86296213	-1.216
ACP5	29326	11685602	11686494	-1.212
PTPRA	36572	2973443	2973959	-1.21
SAFB2	28818	5587194	5588824	-1.198
LOC285484	45017	6200248	6202244	-1.198
MIR548O	54718	102055403	102058604	-1.195
KLHL11	25093	40026334	40027385	-1.194
H2AFY	48170	134713760	134714545	-1.193
NTSR1	38185	61358694	61360013	-1.191
ZBTB16	11633	113942848	113943531	-1.181
CYP2F1	30602	41641644	41642056	-1.18
SCAMP4	28461	1923767	1925170	-1.175
TECPR1	54484	97878245	97879283	-1.17
GATS	54599	99840704	99842002	-1.168
RSPH1	38906	43884142	43884697	-1.164
PRSS21	20778	2879195	2880958	-1.162
LAPTM5	1664	31205337	31205822	-1.161
PRSS27	20766	2771393	2771884	-1.16
CELSR1	40872	46827583	46828850	-1.16
CEACAM21	30657	42081920	42083553	-1.159
UNQ6493	28541	2289305	2289713	-1.157
LINGO3	28541	2289305	2289713	-1.157
MECP2	62362	153301520	153302120	-1.157
CTNND1	10023	57566457	57567137	-1.154
SH2B2	54711	101949669	101951582	-1.153
RPN2	37280	35821792	35824060	-1.151
IL32	20804	3119222	3122488	-1.146
MMP25	20804	3119222	3122488	-1.146
LOC100507419	20804	3119222	3122488	-1.146
FXYD6	11694	117701232	117702627	-1.143
HMGA1	50612	34194278	34195194	-1.141
COX7A2L	32474	42568400	42568843	-1.133
PYROXD2	8297	100174399	100175204	-1.131
HPS1	8297	100174399	100175204	-1.131
SF3B3	22778	70554809	70555657	-1.125
SNORD111B	22778	70554809	70555657	-1.125
LOC100289580	23326	88812244	88812855	-1.121
FLJ40448	23326	88812244	88812855	-1.121
AGK	55322	141358981	141360725	-1.119
TMEM90A	17566	74868314	74869937	-1.115
NEDD4L	27899	56016257	56016960	-1.115
GCNT1	58893	79058416	79060479	-1.115
LAX1	5158	203737297	203737990	-1.114
LOC442497	53031	421435	422073	-1.106
CD164L2	1506	27718246	27718935	-1.098
GPR3	1506	27718246	27718935	-1.098
SLC25A15	15638	41387494	41388427	-1.097
MIR621	15638	41387494	41388427	-1.097
PNPLA6	28991	7607368	7608115	-1.094
GTF3C1	21717	27475181	27475639	-1.093
TTBK1	51104	43222123	43222922	-1.088
BFSP2	43699	133167570	133168813	-1.085
KRT7	13315	52638873	52641349	-1.083
C10orf91	8997	134265681	134266535	-1.08
TMPRSS13	11700	117801074	117803071	-1.08
PRKAG1	13162	49413295	49413567	-1.078
MLL2	13162	49413295	49413567	-1.078
FGGY	2626	59799015	59800092	-1.074
SRGAP3	41177	9220269	9221026	-1.074
LOC100507417	9888	47414074	47414628	-1.073
C22orf39	39385	19443268	19443834	-1.065
UFD1L	39385	19443268	19443834	-1.065
LOC100506503	39385	19443268	19443834	-1.065
GTSF1L	37402	42348744	42351021	-1.062
PRDM10	12142	129830476	129830979	-1.056
LOC100507423	2399	46995161	46998630	-1.051
SETD4	38715	37425125	37425646	-1.05
C12orf32	12273	2977408	2978076	-1.048
FOXM1	12273	2977408	2978076	-1.048
LOC100507424	12273	2977408	2978076	-1.048
ALPK2	27901	56202797	56204219	-1.048
CALML6	154	1838449	1839103	-1.046
TMEM52	154	1838449	1839103	-1.046
JSRP1	28535	2257016	2259073	-1.046
SF3A2	28535	2257016	2259073	-1.046
AMH	28535	2257016	2259073	-1.046
MIR4321	28535	2257016	2259073	-1.046
SART1	10599	65723822	65725620	-1.043
TSGA10IP	10599	65723822	65725620	-1.043
GPR114	22397	57566639	57567313	-1.043
LASS4	29036	8278967	8279685	-1.043
SECISBP2	58995	91967821	91968571	-1.04
SEMA4D	58995	91967821	91968571	-1.04
TASP1	36754	13409788	13412710	-1.039
ACSS1	36865	25022296	25024706	-1.039
RNF130	49239	179433969	179434911	-1.038
MIR340	49239	179433969	179434911	-1.038
C1orf174	269	3819143	3820724	-1.036
LOC100133612	269	3819143	3820724	-1.036
ATP2A3	23777	3818364	3821207	-1.03
SPG11	19015	44926405	44927039	-1.024
PALB2	21565	23640775	23641462	-1.023
TMEM138	10142	61123910	61124455	-1.022
CYBASC3	10142	61123910	61124455	-1.022
DPF3	17504	73180863	73181412	-1.022
SLC25A12	34667	172654715	172656053	-1.022
CEBPE	16543	23588825	23589607	-1.021
SLC7A8	16543	23588825	23589607	-1.021
FAM105B	46826	14703478	14704439	-1.02
ANKH	46826	14703478	14704439	-1.02
BIN3	56151	22497410	22497912	-1.018
FLJ14107	56151	22497410	22497912	-1.018
IL6R	3967	154411850	154412785	-1.017
LOC100505735	38175	61273075	61276740	-1.015
PRPH2	51047	42661193	42662197	-1.015
IPO4	16596	24650534	24651075	-1.013
TM9SF1	16596	24650534	24651075	-1.013
LOC100506792	17807	90096329	90097840	-1.012
SAMD12	57437	119634494	119634736	-1.01
LOC100506402	36974	30921770	30922490	-1.009
DDIT4	7759	74045564	74046318	-1.007
PPIL6	51751	109770980	109771904	-1.007
MICAL1	51751	109770980	109771904	-1.007
SMPD2	51751	109770980	109771904	-1.007
TAPBPL	12375	6549902	6553752	-1.004
KIAA1609	23033	84545254	84545822	-1.003
CSF2RB	40181	37317527	37318664	-1.001
GLIPR2	58689	36142335	36145607	-0.995
RNLS	8085	90144978	90147156	-0.994
LIME1	38284	62367363	62370864	-0.994
ZGPAT	38284	62367363	62370864	-0.994
TNFRSF25	303	6527295	6527610	-0.993
PLEKHG5	303	6527295	6527610	-0.993
ESPN	303	6527295	6527610	-0.993
RUFY1	49207	179034966	179035671	-0.993
DIRC3	35628	218475108	218476763	-0.985
CRYGN	55581	151129034	151131363	-0.983
NOSIP	31236	50057887	50058309	-0.982
B3GNT2	32773	62449416	62450019	-0.981
TTC21B	34590	166777404	166777926	-0.981
SERPINB6	49423	2938872	2941353	-0.972
LRRC68	30854	45590423	45591108	-0.97
GEMIN7	30854	45590423	45591108	-0.97
PTP4A3	58024	142420588	142425730	-0.97
CD74	48541	149774539	149774954	-0.969
FTL	31177	49463918	49466270	-0.968
BAX	31177	49463918	49466270	-0.968
GYS1	31177	49463918	49466270	-0.968
GART	38587	34886241	34887923	-0.968
SLC1A4	32858	65213477	65213926	-0.965
LOC100506200	48162	134676783	134679586	-0.964
FHAD1	738	15672890	15673658	-0.961
COL20A1	38241	61956908	61958476	-0.957
KCTD13	21907	29925827	29926794	-0.956
ASPHD1	21907	29925827	29926794	-0.956
GNB1L	39403	19831694	19833317	-0.956
C22orf29	39403	19831694	19833317	-0.956
NSD1	49112	176703180	176703782	-0.954
INF2	18465	105153835	105154853	-0.951
PPM1F	39546	22299625	22300992	-0.95
LOC100286925	39546	22299625	22300992	-0.95
FLJ90757	27031	78991042	78993619	-0.949
NIPAL3	1175	24807229	24811943	-0.945
MGC12916	24154	14204336	14207939	-0.945
DNMT3B	37035	31363205	31364395	-0.944
ATRIP	42179	48516591	48518612	-0.938
TAF1C	23028	84227671	84228462	-0.937
ADAD2	23028	84227671	84228462	-0.937
LOC654780	23028	84227671	84228462	-0.937
SLC38A5	61419	48319521	48320237	-0.937
KCNQ1	9216	2466541	2469738	-0.936
RASA3	16362	114907319	114910568	-0.935
PSEN2	5703	227072734	227073502	-0.932
NKPD1	30870	45673086	45675267	-0.932
TBC1D22A	40940	47447439	47450185	-0.932
PLTP	37526	44539803	44540247	-0.93
ATAD1	8079	89521944	89522578	-0.929
THAP4	36382	242558036	242559082	-0.929
DDX41	49157	176947692	176949110	-0.929
WDR51A	42431	52120569	52121472	-0.928
CTSH	19968	79231866	79232410	-0.927
C17orf86	26600	75091406	75092350	-0.923
SCARNA16	26600	75091406	75092350	-0.923
SH2D4B	8035	82288605	82290674	-0.921
PGAM2	53866	44113212	44114235	-0.92
POLM	53866	44113212	44114235	-0.92
LOC100506936	53866	44113212	44114235	-0.92
RFX1	29486	14107768	14108381	-0.918
FLJ41733	38957	44772956	44774454	-0.918
LOC100505974	38957	44772956	44774454	-0.918
ANKRD6	51473	90305528	90306015	-0.914
CCT7	33081	73452971	73453707	-0.913
SMYD5	33081	73452971	73453707	-0.913
C2orf7	33081	73452971	73453707	-0.913
LUC7L3	25666	48806652	48807083	-0.911
SPNS1	21812	29002571	29004194	-0.909
LAT	21812	29002571	29004194	-0.909
LRP8	2493	53757400	53766585	-0.906
LOC100507545	27057	79454428	79456318	-0.905
HDAC1	1780	32787019	32788749	-0.903
NINJ1	59226	95905673	95907140	-0.903
PYGO2	4001	154920441	154921244	-0.899
ULK3	19774	75139474	75141196	-0.899
PRAM1	29062	8550687	8553318	-0.898
C7orf72	53998	50184299	50185024	-0.897
PTRF	25190	40545013	40545774	-0.894
SURF1	60429	136209084	136209794	-0.894
HMGXB3	48526	149431434	149433368	-0.893
CSF1R	48526	149431434	149433368	-0.893
SIN3B	29749	16986780	16988056	-0.892
FAM86A	20986	5147952	5148306	-0.891
LOC650177	20986	5147952	5148306	-0.891
LOC100505566	44148	177167184	177167760	-0.89
LOC100507303	20717	2210649	2211149	-0.888
SNORD60	20717	2210649	2211149	-0.888
TRAF7	20717	2210649	2211149	-0.888
RAB26	20717	2210649	2211149	-0.888
LOC100505775	56718	47829511	47830311	-0.887
TLR9	42446	52255041	52257413	-0.886
ALAS1	42446	52255041	52257413	-0.886
TWF2	42446	52255041	52257413	-0.886
C1orf66	4195	156690953	156691570	-0.885
ISG20L2	4195	156690953	156691570	-0.885
CD300C	26311	72543195	72544014	-0.885
SH3BP2	44914	2787758	2790757	-0.885
GIMAP1	55530	150417067	150418119	-0.884
KRI1	29189	10662729	10667358	-0.879
ATG4D	29189	10662729	10667358	-0.879
MIR1238	29189	10662729	10667358	-0.879
CDKN2D	29189	10662729	10667358	-0.879
LOC389607	55771	616355	617752	-0.877
ERICH1	55771	616355	617752	-0.877
TEX264	42402	51718478	51722691	-0.876
TTLL12	40773	43579172	43580945	-0.875
ZNF687	3804	151249472	151250711	-0.874
PSMD4	3804	151249472	151250711	-0.874
LOC100507670	3804	151249472	151250711	-0.874
WASF2	1526	27818815	27819289	-0.873
LOC100505621	10767	67378771	67379126	-0.873
NDUFV1	10767	67378771	67379126	-0.873
PPP4R4	18084	94639959	94640278	-0.867
CUL7	51086	43022007	43023040	-0.867
KLC4	51086	43022007	43023040	-0.867
MRPL2	51086	43022007	43023040	-0.867
DGKZ	9838	46389251	46389550	-0.866
IQGAP1	20259	90966425	90966868	-0.864
ORC2L	35217	201808618	201810216	-0.864
TGFB1I1	22102	31477507	31478908	-0.863
SCAP	42147	47462000	47464028	-0.862
PTPN23	42147	47462000	47464028	-0.862
LOC100505483	55606	151573210	151574067	-0.862
RARA	25029	38504126	38505770	-0.861
OR4D9	10048	59277965	59278461	-0.859
OR4D11	10048	59277965	59278461	-0.859
DIP2A	39290	47971500	47972038	-0.855
PIP5KL1	59946	130671898	130675778	-0.855
RNH1	9087	502364	503065	-0.852
PTK6	38247	62167780	62169694	-0.852
SRMS	38247	62167780	62169694	-0.852
C16orf53	21895	29826389	29826932	-0.85
MVP	21895	29826389	29826932	-0.85
PRRT2	21895	29826389	29826932	-0.85
KIF22	21895	29826389	29826932	-0.85
MAZ	21895	29826389	29826932	-0.85
LOC387723	8945	131904936	131906538	-0.845
C15orf52	18825	40626556	40627009	-0.844
LOC100505573	18825	40626556	40627009	-0.844
SPON2	44787	1160917	1161543	-0.841
LOC100506086	592	11779266	11779950	-0.839
C1orf187	592	11779266	11779950	-0.839
THEM4	3842	151877309	151879214	-0.839
HIRIP3	21920	30015850	30016550	-0.838
INO80E	21920	30015850	30016550	-0.838
DOC2A	21920	30015850	30016550	-0.838
KLHDC7B	41080	50981974	50985322	-0.838
C22orf41	41080	50981974	50985322	-0.838
LOC100507519	20930	4538027	4540074	-0.837
LOC100133985	33023	70346074	70346522	-0.836
ADD1	44931	2835142	2840346	-0.836
IGSF8	4254	160062722	160063148	-0.835
KCNJ9	4254	160062722	160063148	-0.835
LOC154449	53008	170581201	170582066	-0.835
DLL1	53008	170581201	170582066	-0.835
MUM1	28400	1362502	1362847	-0.834
LRRC33	44666	196370109	196371056	-0.827
FAM50B	49454	3849546	3850562	-0.827
KIAA0195	26418	73481814	73485498	-0.826
NUB1	55575	151045737	151046091	-0.826
SOX15	23993	7490454	7490967	-0.825
FXR2	23993	7490454	7490967	-0.825
ITPK1	18031	93507779	93508156	-0.824
RAB36	39563	23480144	23481188	-0.824
LOC644075	912	19685801	19687356	-0.823
C9orf142	60643	139885828	139886683	-0.82
PTGDS	60643	139885828	139886683	-0.82
LCNL1	60643	139885828	139886683	-0.82
CLIC3	60643	139885828	139886683	-0.82
MADD	9878	47286280	47286900	-0.819
NR1H3	9878	47286280	47286900	-0.819
MEOX1	25262	41740007	41741036	-0.819
TXNL4A	28251	77742364	77743012	-0.814
BFAR	21308	14751258	14752582	-0.813
SNX11	25513	46189320	46191528	-0.813
LOC100507321	20760	2723599	2724092	-0.81
KCTD5	20760	2723599	2724092	-0.81
LOC100129999	60527	138998975	139012146	-0.81
SLC25A26	42746	66271322	66272121	-0.809
ZFP37	59565	115818690	115819298	-0.808
LSS	39258	47649147	47650064	-0.807
ZNF710	20221	90602030	90607499	-0.802
CES3	22484	66995730	66996526	-0.802
SNORD103A	1680	31407815	31408222	-0.799
LTB	50417	31559304	31561104	-0.799
NCR3	50417	31559304	31561104	-0.799
LST1	50417	31559304	31561104	-0.799
ALDH1L2	14298	105431476	105432013	-0.798
NLRC3	20863	3631236	3631863	-0.798
BTBD12	20863	3631236	3631863	-0.798
AAK1	32977	69876047	69876383	-0.796
TIAM2	52619	155436425	155437291	-0.795
CLEC4F	33047	71053611	71054845	-0.793
CD207	33047	71053611	71054845	-0.793
GTF2H3	15016	124144049	124144273	-0.792
IFRD2	42333	50332080	50332714	-0.791
HYAL3	42333	50332080	50332714	-0.791
C3orf45	42333	50332080	50332714	-0.791
NAT6	42333	50332080	50332714	-0.791
HYAL1	42333	50332080	50332714	-0.791
SUMF1	41099	4508246	4509339	-0.79
SMPD4	34240	130915938	130916805	-0.787
GPR61	3295	110075108	110075663	-0.785
LOC90834	40948	50174579	50175969	-0.785
BRD1	40948	50174579	50175969	-0.785
LOC100506653	13427	54668871	54669716	-0.784
ZNF611	31401	53238430	53239258	-0.783
TACC3	44839	1752883	1758454	-0.782
FLT3LG	31215	49969069	49969881	-0.78
ALDH16A1	31215	49969069	49969881	-0.78
TOR3A	4713	179060251	179061445	-0.779
ABL2	4713	179060251	179061445	-0.779
CHST14	18838	40756989	40757663	-0.775
LOC100130109	28817	5585186	5587061	-0.775
BTN2A1	50140	26464758	26465310	-0.775
LOC285819	50140	26464758	26465310	-0.775
CDK12	24928	37616822	37617448	-0.774
ADAT3	28448	1895334	1896958	-0.773
EPRS	5494	220220149	220221304	-0.772
BPNT1	5494	220220149	220221304	-0.772
PI4K2B	45254	25240780	25241827	-0.771
AMZ1	53229	2748861	2751240	-0.77
RN5S13	5790	228782455	228784189	-0.766
RN5S14	5790	228782455	228784189	-0.766
RN5S15	5790	228782455	228784189	-0.766
RN5S16	5790	228782455	228784189	-0.766
RN5S17	5790	228782455	228784189	-0.766
C4orf52	45264	25938963	25942041	-0.765
IL12RB1	29850	18199310	18203250	-0.764
MAST3	29850	18199310	18203250	-0.764
SNAR-E	30994	47324006	47325812	-0.764
SAMD3	52046	130459371	130460682	-0.762
CELA3A	1071	22345021	22346419	-0.76
ZNF341	37087	32366063	32368209	-0.76
C19orf20	28266	509472	510131	-0.758
MADCAM1	28266	509472	510131	-0.758
TBL1XR1	44123	176859361	176860244	-0.758
CIITA	21056	10971015	10973403	-0.757
PAF1	30482	39887700	39889580	-0.757
ZFP36	30482	39887700	39889580	-0.757
MED29	30482	39887700	39889580	-0.757
C1orf38	1558	28190407	28191360	-0.756
IL1F7	34067	113673086	113674256	-0.753
ASXL1	36975	30941139	30946408	-0.753
PRR5L	9739	36424074	36424961	-0.752
SH3GLB2	60083	131798156	131798673	-0.751
ATG16L2	10959	72539097	72540155	-0.749
FCHSD2	10959	72539097	72540155	-0.749
IL27	21784	28524834	28526301	-0.749
MUC17	54665	100661785	100662601	-0.749
MUC12	54665	100661785	100662601	-0.749
RPL36AL	16784	50095754	50096518	-0.747
C14orf104	16784	50095754	50096518	-0.747
MGAT2	16784	50095754	50096518	-0.747
EMILIN2	27329	2882648	2884474	-0.744
ARPC4	41198	9828781	9829872	-0.742
GLT1D1	15120	129397548	129403007	-0.738
FLVCR2	17634	76031026	76035597	-0.734
PGLYRP4	3855	153315482	153317424	-0.733
SIRT7	27107	79881237	79882772	-0.73
ZBTB48	313	6651169	6652253	-0.727
PKN1	29557	14549704	14550556	-0.727
CCDC85C	18206	100070872	100071693	-0.726
LOC100507108	18206	100070872	100071693	-0.726
WDR85	60736	140458228	140459725	-0.726
NCRNA00203	18034	93532985	93533754	-0.725
EED	11251	85952673	85953421	-0.723
GJD3	25031	38507855	38508536	-0.723
FAM78A	60259	134153491	134154649	-0.723
C1orf57	5916	233078497	233082189	-0.722
C6orf204	51930	119001667	119002321	-0.722
SPATA13	15308	24832964	24833648	-0.721
FAM83G	24345	18908139	18909041	-0.721
SLC5A10	24345	18908139	18909041	-0.721
POU2F2	30690	42615609	42616636	-0.721
BCL11A	32722	60725278	60725712	-0.72
LOC100286932	32722	60725278	60725712	-0.72
GON4L	4081	155828545	155828808	-0.719
SYT11	4081	155828545	155828808	-0.719
C12orf66	13708	64615470	64616568	-0.717
PNKD	35655	219181238	219181977	-0.716
FSD1	28741	4298004	4299126	-0.715
TMIGD2	28741	4298004	4299126	-0.715
SHD	28741	4298004	4299126	-0.715
TSPAN15	7644	71224141	71225544	-0.713
SGSM3	40526	40810918	40813444	-0.711
FTSJ3	25928	61907531	61910373	-0.71
PSMC5	25928	61907531	61910373	-0.71
C20orf112	36983	31033399	31034639	-0.71
HTATIP2	9610	20384892	20386887	-0.707
GBAS	54094	56031584	56032164	-0.705
MRPS17	54094	56031584	56032164	-0.705
MED20	50951	41896450	41897425	-0.702
BYSL	50951	41896450	41897425	-0.702
NDE1	21345	15765096	15768196	-0.701
SERPINE1	54675	100784142	100784814	-0.701
CTU2	23319	88763572	88764328	-0.698
RNF166	23319	88763572	88764328	-0.698
MIR363	62118	133305653	133307386	-0.698
MIR92A2	62118	133305653	133307386	-0.698
MIR19B2	62118	133305653	133307386	-0.698
MIR20B	62118	133305653	133307386	-0.698
MIR18B	62118	133305653	133307386	-0.698
MIR106A	62118	133305653	133307386	-0.698
ADAMTS4	4406	161168686	161173722	-0.697
NDUFS2	4406	161168686	161173722	-0.697
DNASE1	20870	3705312	3706335	-0.697
TRAP1	20870	3705312	3706335	-0.697
AMT	42266	49456199	49457467	-0.697
TCTA	42266	49456199	49457467	-0.697
NICN1	42266	49456199	49457467	-0.697
SLMO1	27450	12419647	12420621	-0.694
IRAK1	62353	153277361	153279518	-0.694
MIR718	62353	153277361	153279518	-0.694
3-Mar	47850	126365116	126367173	-0.692
DUSP2	33471	96818544	96821299	-0.69
AVP	36582	3073226	3074458	-0.69
SYT8	9188	1865031	1866322	-0.688
PRR5	40799	45064019	45064410	-0.688
SGCD	48675	156180585	156181536	-0.688
MRPL44	35732	224813208	224816085	-0.687
UBXN11	1385	26626342	26628295	-0.686
FTSJ1	61428	48335879	48336640	-0.685
MAPKBP1	18908	42096462	42097067	-0.684
LOC100507373	29506	14259056	14261837	-0.684
LPHN1	29506	14259056	14261837	-0.684
CCR8	41877	39368457	39370558	-0.684
SDCCAG8	6134	243578748	243579984	-0.682
STK25	36376	242446748	242449023	-0.682
LMAN2	49126	176784872	176787148	-0.682
RGS14	49126	176784872	176787148	-0.682
LOC100288181	58048	143808633	143810276	-0.682
C8orf55	58048	143808633	143810276	-0.682
LOC100506647	49753	14275851	14277260	-0.68
MIR625	17254	65936401	65937767	-0.679
ISG20	20155	89191207	89191961	-0.679
PSD4	34079	113924480	113927145	-0.679
ZNF292	51447	87890147	87891912	-0.679
WDR89	17146	64118026	64118653	-0.678
DNLZ	60542	139256444	139257209	-0.678
GPSM1	60542	139256444	139257209	-0.678
DIXDC1	11613	111810511	111812541	-0.677
GSTK1	55363	142975985	142977709	-0.677
SIN3A	19831	75653248	75654131	-0.676
EIF3K	30400	39126342	39128319	-0.676
CLN3	21778	28504262	28508839	-0.675
APOB48R	21778	28504262	28508839	-0.675
GRB10	54068	50732850	50734048	-0.675
LOC100507442	39545	22293297	22299529	-0.674
MFSD10	44937	2924108	2925540	-0.674
UBOX5	36583	3101513	3103203	-0.673
HYOU1	11845	118922110	118923715	-0.672
GRAMD1A	30231	35504024	35506079	-0.672
EPN1	31529	56190470	56191085	-0.672
U2AF2	31529	56190470	56191085	-0.672
ZNF329	31609	58661579	58662244	-0.671
LOC100129931	45090	7053713	7055400	-0.671
CCDC96	45090	7053713	7055400	-0.671
TADA2B	45090	7053713	7055400	-0.671
GRPEL1	45090	7053713	7055400	-0.671
SPON1	9523	14095413	14096581	-0.669
C6orf225	51890	112408169	112408898	-0.669
TUBE1	51890	112408169	112408898	-0.669
RAB8A	29654	16230690	16231562	-0.668
LOC653479	25454	45569587	45570497	-0.667
LOC100506239	30243	35700890	35706216	-0.667
FAM187B	30243	35700890	35706216	-0.667
LOC100507153	44721	197383814	197384354	-0.667
TRAF2	60631	139808312	139808813	-0.665
PRSS16	50179	27218749	27219272	-0.663
C1orf69	5765	228349777	228352711	-0.662
LOC100506642	5765	228349777	228352711	-0.662
DDX27	37679	47847157	47847871	-0.661
B4GALT3	4399	161154969	161157481	-0.66
PSIP1	58390	15499108	15499868	-0.66
DHX58	25114	40267551	40268042	-0.659
HSPB9	25114	40267551	40268042	-0.659
KAT2A	25114	40267551	40268042	-0.659
RAB5C	25114	40267551	40268042	-0.659
CLN8	55798	1735904	1736550	-0.659
CDCA7	34701	174234724	174235901	-0.658
UTP6	24682	30204067	30208090	-0.656
COX6B1	30266	36132795	36135326	-0.656
ETV2	30266	36132795	36135326	-0.656
RBM42	30266	36132795	36135326	-0.656
ZNF180	30812	45003345	45005024	-0.656
CEACAM20	30812	45003345	45005024	-0.656
PPP5C	30949	46856094	46856716	-0.654
HIF3A	30949	46856094	46856716	-0.654
ARHGEF19	831	16533160	16534262	-0.653
DMTF1	54377	86811399	86811839	-0.653
ARID3A	28312	926121	926944	-0.652
KISS1R	28312	926121	926944	-0.652
ATAD3B	110	1406315	1407283	-0.647
ATAD3C	110	1406315	1407283	-0.647
PRDX5	10366	64079792	64082955	-0.646
ESRRA	10366	64079792	64082955	-0.646
C11orf20	10366	64079792	64082955	-0.646
TRMT112	10366	64079792	64082955	-0.646
UTF1	9015	135038204	135039499	-0.645
KNDC1	9015	135038204	135039499	-0.645
IFLTD1	12824	25742788	25744697	-0.645
LOC100506779	25770	56394655	56394942	-0.645
BZRAP1	25770	56394655	56394942	-0.645
ARMC7	26355	73119925	73122526	-0.645
LIMD1	42009	45717909	45719077	-0.645
LOC644714	42009	45717909	45719077	-0.645
EIF3L	40303	38293842	38295329	-0.643
SLMO2	38111	57618033	57618674	-0.641
SNAP47	5727	227935612	227936483	-0.64
MFSD11	26589	74768715	74769576	-0.639
PPP4C	21930	30102141	30104922	-0.638
AKNA	59624	117128017	117131225	-0.638
RHEBL1	13166	49462977	49464442	-0.635
PFDN5	13363	53683612	53684375	-0.635
C12orf10	13363	53683612	53684375	-0.635
ESPL1	13363	53683612	53684375	-0.635
TIGD7	20838	3354909	3356280	-0.635
ZNF75A	20838	3354909	3356280	-0.635
C2orf52	35972	232378647	232379916	-0.635
NMUR1	35972	232378647	232379916	-0.635
TMEM189-UBE2V1	37735	48702261	48703027	-0.635
UBE2V1	37735	48702261	48703027	-0.635
USP28	11630	113746394	113746871	-0.634
LOC285286	43001	72149161	72150612	-0.634
CAPSL	46927	35903378	35903998	-0.634
NACA	13591	57120235	57120725	-0.633
PRIM1	13591	57120235	57120725	-0.633
ZBED4	40970	50246380	50247345	-0.633
H2AFY2	7649	71851806	71852802	-0.632
SLA2	37233	35259658	35260984	-0.628
PATL2	19019	44967308	44970983	-0.627
TNRC18	53314	5435848	5438017	-0.624
ORAI2	54722	102063490	102073936	-0.624
RELT	10981	73092132	73093028	-0.623
LOC100506040	59929	130570493	130571151	-0.623
ENG	59929	130570493	130571151	-0.623
LOC100507333	58214	145732558	145736440	-0.622
MFSD3	58214	145732558	145736440	-0.622
LRRC14	58214	145732558	145736440	-0.622
PPP1R16A	58214	145732558	145736440	-0.622
GPT	58214	145732558	145736440	-0.622
RECQL4	58214	145732558	145736440	-0.622
NUDT19	30157	33187677	33188051	-0.619
LCK	1769	32727592	32728924	-0.618
LOC100507522	29739	16740664	16741481	-0.618
APOC1	30832	45417950	45418879	-0.618
APOE	30832	45417950	45418879	-0.618
GLI4	58066	144352057	144352974	-0.618
ZFP41	58066	144352057	144352974	-0.618
LOC100507316	58066	144352057	144352974	-0.618
PLA2G12A	46052	110651375	110651895	-0.617
CFI	46052	110651375	110651895	-0.617
LOC100506600	47283	66303646	66304451	-0.616
STK11	28367	1204945	1205912	-0.614
ACO2	40610	41919517	41922642	-0.614
POLR3H	40610	41919517	41922642	-0.614
ITPR3	50594	33650833	33652531	-0.614
tcag7.1196	55487	150105260	150106139	-0.614
LOC100506080	60049	131449963	131451298	-0.614
SET	60049	131449963	131451298	-0.614
PTRH2	25821	57780998	57781587	-0.613
CLTC	25821	57780998	57781587	-0.613
LPAR2	30032	19745603	19746515	-0.613
GMIP	30032	19745603	19746515	-0.613
MRPS5	33450	95738092	95743486	-0.613
PPP2R4	60095	131904276	131905002	-0.613
RPP14	42635	58310766	58311522	-0.612
TNKS1BP1	9968	57097568	57098189	-0.611
P2RX3	9968	57097568	57098189	-0.611
SSRP1	9968	57097568	57098189	-0.611
SELL	4578	169653833	169656192	-0.61
C16orf57	22421	58027442	58028425	-0.61
TEPP	22421	58027442	58028425	-0.61
ZNF319	22421	58027442	58028425	-0.61
ZRANB3	34311	136003043	136003379	-0.609
ZNF498	54539	99218716	99224468	-0.609
DOK1	33179	74775787	74776976	-0.607
LOXL3	33179	74775787	74776976	-0.607
RRM1	9311	4112525	4114074	-0.606
BCL2L14	12635	12223332	12225514	-0.606
CEACAM1	30752	43032259	43033700	-0.606
TCHP	14393	110364457	110364936	-0.605
ZNF256	31603	58458279	58459391	-0.605
LOC388588	255	3688279	3689012	-0.604
CCDC27	255	3688279	3689012	-0.604
PIK3R5	24098	8842186	8846101	-0.604
ZNF583	31555	56914993	56916320	-0.604
BC036928	31555	56914993	56916320	-0.604
FLJ44606	47851	126408484	126409394	-0.604
ODZ2	48885	167652072	167655743	0.601
CDV3	43709	133293170	133297278	0.602
LOC100129716	47551	90675100	90676014	0.603
ARRDC3	47551	90675100	90676014	0.603
ST7OT2	54930	116749982	116751517	0.603
LPIN1	31956	11917965	11919464	0.604
CTSL1	58964	90340480	90341947	0.604
TNRC6A	21593	24741420	24742035	0.605
REEP3	7550	65388311	65391554	0.607
CDH13	23015	82684999	82690216	0.608
ZNF323	50234	28302829	28304954	0.608
EIF2AK2	32345	37382444	37385233	0.61
SULT6B1	32345	37382444	37385233	0.61
VDAC1	48043	133297880	133299832	0.61
LOC100506687	864	17221861	17222531	0.611
RNU1-2	864	17221861	17222531	0.611
DDB2	9868	47239013	47240293	0.611
HSPA6	4422	161500428	161501068	0.612
PAG1	57100	81973264	81974199	0.614
PROC	34200	128167168	128168886	0.615
SLC25A37	56206	23396092	23397613	0.615
YWHAE	23547	1283368	1285431	0.618
IRF8	23120	85931884	85937749	0.62
CUL3	35746	225447846	225449457	0.62
MIR4312	19610	69081217	69086355	0.624
KDM6B	24003	7737025	7741451	0.631
DNAH2	24003	7737025	7741451	0.631
AMMECR1L	34224	128641970	128642898	0.631
ADAM19	48793	156967980	156969338	0.632
MIR623	16197	100005513	100014278	0.633
FKSG29	16197	100005513	100014278	0.633
WDR78	2748	67398717	67400748	0.634
MIER1	2748	67398717	67400748	0.634
TRAJ50	16492	22954141	22960172	0.636
TRAJ49	16492	22954141	22960172	0.636
TRAJ48	16492	22954141	22960172	0.636
TRAJ47	16492	22954141	22960172	0.636
TRAJ46	16492	22954141	22960172	0.636
TRAJ45	16492	22954141	22960172	0.636
TRAJ44	16492	22954141	22960172	0.636
TRAJ43	16492	22954141	22960172	0.636
TRAJ42	16492	22954141	22960172	0.636
TRAJ41	16492	22954141	22960172	0.636
TRAJ40	16492	22954141	22960172	0.636
TRA@	16492	22954141	22960172	0.636
TRAJ61	16492	22954141	22960172	0.636
TRAJ59	16492	22954141	22960172	0.636
TRAJ58	16492	22954141	22960172	0.636
TRAJ57	16492	22954141	22960172	0.636
TRAJ56	16492	22954141	22960172	0.636
TRAJ54	16492	22954141	22960172	0.636
TRAJ53	16492	22954141	22960172	0.636
TRAJ52	16492	22954141	22960172	0.636
USP49	50942	41782875	41784270	0.638
KLF6	6325	3820225	3829103	0.639
RIF1	34427	152278801	152281993	0.639
LOC100506525	40470	40353976	40358406	0.64
GRAP2	40470	40353976	40358406	0.64
RNF168	44652	196226607	196231097	0.641
C3orf43	44652	196226607	196231097	0.641
KCTD17	40195	37454689	37458463	0.644
LOC100287036	23375	89380582	89385268	0.645
ZNF490	29369	12723368	12725575	0.645
ZNF791	29369	12723368	12725575	0.645
C5orf15	48041	133295143	133296447	0.648
BCAR3	3136	94081815	94083271	0.649
RNF19A	57274	101324249	101326062	0.649
RAB7A	43593	128505695	128509103	0.65
SLC9A7	61360	46562231	46565515	0.659
PCNXL2	5925	233430419	233432013	0.66
C1QTNF6	40229	37577934	37586012	0.66
GPRIN3	45816	90226048	90229617	0.66
NID1	6090	236135197	236135812	0.665
MED12L	43895	150917574	150921267	0.665
GPR171	43895	150917574	150921267	0.665
P2RY14	43895	150917574	150921267	0.665
LOC100128059	48944	169718072	169740582	0.667
DDX10	11560	108724325	108725500	0.669
IFIT5	8131	91173593	91176398	0.678
IFIT1	8131	91173593	91176398	0.678
IL28RA	1160	24513162	24514760	0.68
LOC100506087	4684	174934171	174939278	0.68
LOC729467	2621	59606759	59607750	0.681
MIR1260B	11435	96070741	96076394	0.682
CCDC82	11435	96070741	96076394	0.682
RCC2	878	17762567	17764160	0.683
ZNF652	25576	47437231	47439519	0.683
EFHD2	748	15741871	15744455	0.685
CD70	28924	6592130	6593002	0.693
FRMD4A	6752	14050321	14052495	0.696
LOC100507614	55556	150734683	150738897	0.697
ACCN3	55556	150734683	150738897	0.697
ABCB8	55556	150734683	150738897	0.697
SFXN1	49060	174915559	174917496	0.699
LOC100506259	11197	82781247	82784726	0.701
FLJ13224	12903	31469704	31471657	0.702
FAM60A	12903	31469704	31471657	0.702
PAQR8	51271	52252957	52255820	0.706
RFC1	45405	39353361	39358045	0.711
MPP6	53564	24635347	24636012	0.714
GEM	57186	95253566	95255532	0.715
IQCH	19583	67545378	67547454	0.716
AAGAB	19583	67545378	67547454	0.716
RAPGEF3	13085	48147934	48150995	0.719
LOC100130476	52240	138188311	138197352	0.719
TNFAIP3	52240	138188311	138197352	0.719
FGR	1546	27957787	27958815	0.72
USP3	19372	63789254	63792087	0.721
LOC100289143	13910	76370808	76374093	0.722
GRHL3	1168	24678171	24679567	0.723
LOC100506860	55070	130586447	130588591	0.724
hCG_2038586	55070	130586447	130588591	0.724
GPR157	455	9186951	9189164	0.725
MRC2	25890	60703953	60708287	0.728
LPCAT4	18727	34657077	34659308	0.729
C15orf55	18727	34657077	34659308	0.729
PTCHD1	61074	23341420	23344783	0.73
RASGEF1B	45716	82391460	82393936	0.733
RAP1B	13839	69005049	69009022	0.739
CCDC64	14727	120427684	120429108	0.743
DDX60	46470	169239049	169240219	0.747
PPP2R2A	56222	26149038	26151396	0.748
LRRC16A	50062	25367163	25369089	0.749
LOC100507672	50658	35310117	35312903	0.749
KIAA0513	23091	85089032	85090318	0.75
LOC100129101	5325	207456359	207457888	0.753
RNF215	39930	30792525	30795560	0.755
SC4MOL	46467	166248751	166250633	0.756
ZNF771	21956	30407923	30412753	0.763
ZNF48	21956	30407923	30412753	0.763
TMPRSS6	40207	37507743	37514586	0.766
SUPT3H	51212	45131040	45133311	0.767
IL2RA	6441	6085797	6089557	0.769
SRFBP1	47791	121297360	121299284	0.773
LOC100506260	38583	34807426	34808775	0.774
UBTD1	8280	99301622	99303426	0.775
PGBD1	50233	28270936	28272392	0.779
CCDC6	7406	61638739	61641073	0.782
PEX26	39342	18574270	18575373	0.782
LOC100506261	39342	18574270	18575373	0.782
TRGV5	53776	38398063	38399303	0.783
TRGV4	53776	38398063	38399303	0.783
TRGV3	53776	38398063	38399303	0.783
TRG@	53776	38398063	38399303	0.783
LOC100506776	53776	38398063	38399303	0.783
TRGV2	53776	38398063	38399303	0.783
FAM49B	57797	130897292	130902033	0.79
MIR155	38447	26931954	26942738	0.791
MIR155HG	38447	26931954	26942738	0.791
TOX	56809	59711648	59715378	0.791
FAM190B	8046	86088307	86091791	0.798
CD6	10080	60758483	60759231	0.799
CD101	3574	117558944	117562032	0.803
B4GALT6	27674	29238564	29239767	0.803
CTNNB1	41902	41241581	41243018	0.805
SAPS3	10827	68236558	68241806	0.806
MRPS6	38607	35446310	35448936	0.808
SLC5A3	38607	35446310	35448936	0.808
INPP4A	33603	99085459	99091882	0.81
GABARAPL1	12566	10364911	10366853	0.818
NCOA7	51975	126238871	126242769	0.824
IFNGR2	38581	34775853	34777453	0.826
TNPO3	54991	128648893	128650710	0.826
RPS4Y2	62545	22907301	22909755	0.826
GPR183	16187	99966607	99969268	0.827
KLHL25	20144	86330391	86333744	0.828
NLRP1	23888	5430257	5431873	0.832
TOMM34	37475	43594148	43601081	0.833
LOC100505826	37475	43594148	43601081	0.833
IL18RAP	33800	103032990	103034802	0.838
SLC2A3	12479	8085927	8088793	0.847
NFATC4	16629	24834974	24837091	0.848
FLJ44006	33960	111878470	111880114	0.85
BCL2L11	33960	111878470	111880114	0.85
FAM55C	43141	101546063	101549121	0.851
LAMA2	52022	129810962	129812987	0.853
ARHGAP18	52027	130006965	130008125	0.868
TNFSF11	15719	43147950	43150593	0.879
TNFRSF9	354	7998181	8003523	0.896
CHGB	36724	5899508	5901501	0.9
TPM3	3917	154143219	154144995	0.906
LY9	4345	160765941	160770956	0.91
NR6A1	59824	127420764	127423131	0.914
LOC100289548	7035	27256166	27260489	0.916
LOC100507042	54030	50368717	50370622	0.916
PDE2A	10934	72395082	72399365	0.921
YPEL2	25801	57437564	57439883	0.93
ZNF516	28124	74086979	74088465	0.931
JMJD1C	7541	65025095	65029437	0.934
GOLGA8B	18735	34869819	34872094	0.939
TNIP3	46112	122058592	122062123	0.943
PHACTR2	52372	144126044	144127502	0.943
TNFRSF1B	654	12243918	12250163	0.945
SUFU	8424	104380042	104382241	0.953
ACAD11	43691	132266564	132270645	0.954
FSTL4	48030	132666091	132676146	0.956
IRF4	49328	397000	399472	0.957
RSAD2	31714	7020254	7020799	0.966
LOC100506254	31714	7020254	7020799	0.966
DAPK1	58962	90323599	90326341	0.966
FAM69A	3098	93342865	93344785	0.975
PRKD3	32348	37550309	37551634	0.983
BCL2A1	19983	80258688	80262019	0.989
GLIS3	58282	4297073	4299499	0.99
LOC100287493	58282	4297073	4299499	0.99
TNIP1	48570	150442507	150450572	0.991
NEK6	59814	127020506	127022602	0.993
LOC728730	32439	39738220	39741678	0.998
ZCCHC14	23177	87496836	87499767	1.001
WAPAL	8056	88200060	88202104	1.008
DNAJC13	43690	132261581	132264677	1.025
RGS16	4784	182568463	182574195	1.029
SKIL	44036	170073311	170074640	1.031
TMEM71	57839	133770429	133773544	1.04
CYTH3	53380	6260855	6262326	1.052
LOC284648	4797	182591828	182600846	1.063
SH2D4A	55986	19244882	19247929	1.063
LOC100506736	24783	33813823	33815624	1.072
ZNF238	6142	244212725	244214079	1.073
LOC339529	6142	244212725	244214079	1.073
KLRK1	12574	10515602	10518440	1.079
TEC	45515	48128704	48136919	1.092
TMEM212	44070	171564709	171566290	1.097
LOC100507568	18746	38364553	38365521	1.121
PACSIN2	40747	43329114	43330989	1.123
FLJ22447	17119	62127456	62130623	1.125
IER5	4751	181068831	181070501	1.135
PMEPA1	38057	56282621	56284268	1.142
LOC100505487	21039	9215915	9220356	1.194
BHLHE40	41148	5022921	5026564	1.219
SNTB1	57459	121723141	121727571	1.219
ZNF704	57089	81786638	81787334	1.227
LOC100506403	38708	36798549	36801670	1.273
C6orf124	52981	168232276	168234221	1.287
MLLT4	52981	168232276	168234221	1.287
YPEL5	32287	30378078	30383500	1.303
GPR25	5028	200834088	200835612	1.31
CAMSAP1L1	5028	200834088	200835612	1.31
ICOS	35388	204812410	204818011	1.313
ATP1B1	4555	169074791	169078443	1.358
SAMSN1	38379	15919109	15923353	1.394
CUBN	6835	17069807	17073110	1.426
LOC100506023	4663	173378760	173381119	1.429
MBNL2	16064	97908689	97916228	1.49
KIF26B	6181	245485621	245488393	1.509
FBXW11	48968	171386592	171391672	1.573
NCRNA00114	38792	40139324	40142177	1.631
ACOXL	33956	111799280	111802415	1.65
MAN1C1	1302	25998315	26004415	1.748

## Sheet: Table S5
Table S5. 57 Treg-specific gene signature identified by combined analysis of H3K27Ac ChIPseq and RNAseq as genes whose expression is directly regulated by CBP/p300 through histone acetylation. Data from 3 donors. See Diagram in Fig. 2E (red track).
Gene	Active Region	Start	End	Treg cells: GNE-781 vs. DMSO Log2Ratio
C2CD2	38852	43342008	43342917	-1.932
VPS8	44269	184528109	184529488	-1.861
MT2A	22295	56648712	56649186	-1.766
ZBTB46	38289	62380942	62383018	-1.347
HS3ST3B1	24160	14241313	14241704	-1.288
FLT4	49251	180050499	180051087	-1.271
MORC3	38734	37681734	37683118	-1.259
SASH3	62044	128903667	128904612	-1.259
CD8B	33367	87063751	87064244	-1.225
LAPTM5	1664	31205337	31205822	-1.161
FXYD6	11694	117701232	117702627	-1.143
GCNT1	58893	79058416	79060479	-1.115
LAX1	5158	203737297	203737990	-1.114
BFSP2	43699	133167570	133168813	-1.085
KRT7	13315	52638873	52641349	-1.083
SRGAP3	41177	9220269	9221026	-1.074
GTSF1L	37402	42348744	42351021	-1.062
ALPK2	27901	56202797	56204219	-1.048
JSRP1	28535	2257016	2259073	-1.046
TM9SF1	16596	24650534	24651075	-1.013
RASA3	16362	114907319	114910568	-0.935
LAT	21812	29002571	29004194	-0.909
ULK3	19774	75139474	75141196	-0.899
PTRF	25190	40545013	40545774	-0.894
DGKZ	9838	46389251	46389550	-0.866
TGFB1I1	22102	31477507	31478908	-0.863
SPON2	44787	1160917	1161543	-0.841
DLL1	53008	170581201	170582066	-0.835
CLIC3	60643	139885828	139886683	-0.82
AAK1	32977	69876047	69876383	-0.796
TOR3A	4713	179060251	179061445	-0.779
AMZ1	53229	2748861	2751240	-0.77
TBL1XR1	44123	176859361	176860244	-0.758
ASXL1	36975	30941139	30946408	-0.753
FCHSD2	10959	72539097	72540155	-0.749
SYT11	4081	155828545	155828808	-0.719
CCR8	41877	39368457	39370558	-0.684
EIF3K	30400	39126342	39128319	-0.676
SPON1	9523	14095413	14096581	-0.669
LIMD1	42009	45717909	45719077	-0.645
TNRC18	53314	5435848	5438017	-0.624
ENG	59929	130570493	130571151	-0.623
PPP2R4	60095	131904276	131905002	-0.613
SELL	4578	169653833	169656192	-0.61
PIK3R5	24098	8842186	8846101	-0.604
LPIN1	31956	11917965	11919464	0.604
IQCH	19583	67545378	67547454	0.716
AAGAB	19583	67545378	67547454	0.716
RAP1B	13839	69005049	69009022	0.739
ZNF771	21956	30407923	30412753	0.763
ZNF48	21956	30407923	30412753	0.763
TRGV3	53776	38398063	38399303	0.783
LAMA2	52022	129810962	129812987	0.853
TPM3	3917	154143219	154144995	0.906
GOLGA8B	18735	34869819	34872094	0.939
PACSIN2	40747	43329114	43330989	1.123
KIF26B	6181	245485621	245488393	1.509
